# Supplementary material for: Theoretical investigation of the reaction mechanism of THP oxidative rearrangement catalysed by BBOX
Source: Royal Society of Chemistry journal article supplement (doi:10.1039/d4cp01661k), 2024-01-01
Supplement: d4cp01661k1.pdf [file d4cp01661k1.pdf]

## Supporting Information

### Theoretical investigation of the reaction mechanism of THP oxidative rearrangement catalysed by BBOX

*Fanqi Meng, Lu Sun, Yueying Liu, Xiang Li, Hongwei Tan\*, Chang Yuan\*, Xichen Li*

*1. Key Laboratory of Theoretical and Computational Photochemistry, Ministry of Education, College of Chemistry, Beijing Normal University, Beijing 100875, China*

\*Authors to whom correspondence should be addressed.

E-mail address: hongwei.tan@bnu.edu.cn

yuanchang@bnu.edu.cn

#### Contents

|                                                                                 |     |
|---------------------------------------------------------------------------------|-----|
| Part I Supplementary Schemes.....                                               | S2  |
| Part II Supplementary Tables.....                                               | S2  |
| Part III Supplementary Figures .....                                            | S4  |
| Part IV DFT calculations of the BBOX-catalysed $\gamma$ -BB hydroxylation ..... | S13 |
| Part V Supplementary coordinates.....                                           | S16 |

## Part I Supplementary Schemes

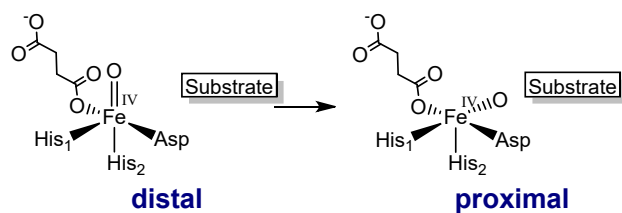

**Scheme S1.**  $\text{Fe}^{\text{IV}}=\text{O}$  species transition from distal to proximal type conformation.

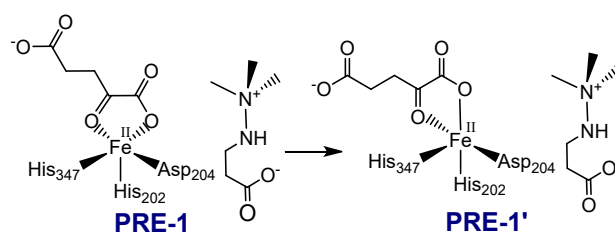

**Scheme S2.** A possible pathway of  $\text{Fe}^{\text{IV}}=\text{O}$  group isomerization in BBOX. 2OG rotates before  $\text{O}_2$  binding.

## Part II Supplementary Tables

**Table S1.** Spin populations on the key atoms of the stationary point structures along the reaction process of the  $\text{Fe}^{\text{IV}}=\text{O}$  group isomerization in the BBOX catalysed THP process.

| Compound                         | Fe   | O <sub>P</sub> | O <sub>W1</sub> | O <sub>W2</sub> |
|----------------------------------|------|----------------|-----------------|-----------------|
| <sup>5</sup> 1                   | 3.12 | 0.65           | —               | —               |
| <sup>5</sup> TS <sub>1-2</sub>   | 3.20 | 0.64           | —               | —               |
| <sup>5</sup> 1 <sub>W</sub>      | 3.19 | 0.60           | 0               | 0               |
| <sup>5</sup> TS <sub>1W</sub>    | 3.40 | 0.28           | 0               | 0               |
| <sup>5</sup> INT <sub>12W1</sub> | 3.50 | 0              | 0               | 0               |
| <sup>5</sup> TS <sub>2W</sub>    | 3.52 | 0              | 0               | 0               |
| <sup>5</sup> INT <sub>12W2</sub> | 3.44 | 0.19           | 0.12            | 0               |
| <sup>5</sup> TS <sub>3W</sub>    | 3.38 | 0              | 0.33            | 0               |
| <sup>5</sup> 2 <sub>W</sub>      | 3.20 | 0              | 0.58            | 0               |
| <sup>5</sup> 2                   | 3.12 | —              | 0.66            | —               |

**Table S2.** Spin populations on the key atoms in the stationary point structures along the BBOX-catalysed THP process.

| Compound                                     | Fe   | O    | C3    | N4    | N5    | C6    | C7    |
|----------------------------------------------|------|------|-------|-------|-------|-------|-------|
| <sup>5</sup> 2                               | 3.12 | 0.66 | 0     | 0     | 0     | 0     | 0     |
| <sup>5</sup> TS <sub>2-3</sub>               | 3.91 | 0.12 | -0.19 | -0.10 | 0     | 0     | 0     |
| <sup>5</sup> 3                               | 4.21 | 0.31 | -0.83 | -0.11 | 0     | 0     | 0     |
| <sup>5</sup> TS <sub>3-4</sub>               | 4.19 | 0.37 | -0.71 | -0.12 | -0.14 | 0     | 0     |
| <sup>5</sup> 4                               | 4.21 | 0.35 | 0     | 0     | -0.79 | 0     | 0     |
| <sup>5</sup> 4 <sub>2</sub>                  | 4.23 | 0.29 | 0     | 0     | -0.78 | 0     | 0     |
| <sup>5</sup> TS <sub>4-5</sub>               | 3.88 | 0.37 | 0     | 0     | -0.11 | 0     | 0     |
| <sup>5</sup> 5                               | 3.16 | 0.62 | 0     | 0     | 0     | 0     | 0     |
| <sup>5</sup> TS <sub>5-6</sub>               | 4.03 | 0    | 0     | 0     | 0     | 0     | -0.54 |
| <sup>5</sup> 6                               | 4.21 | 0.34 | 0     | 0     | 0     | 0     | -1.07 |
| <sup>5</sup> TS <sub>6-7</sub>               | 4.17 | 0.29 | 0     | 0     | 0     | 0     | -0.91 |
| <sup>5</sup> 7                               | 3.82 | 0    | 0     | 0     | 0     | 0     | 0     |
| <sup>5</sup> TS <sub>6-8</sub>               | 4.23 | 0.24 | 0.19  | -0.45 | 0     | 0     | -0.76 |
| <sup>5</sup> 8                               | 4.23 | 0.28 | 0     | -0.95 | 0     | 0     | 0     |
| <sup>5</sup> TS <sub>8-9</sub>               | 4.23 | 0.24 | 0     | -0.49 | 0     | -0.56 | 0     |
| <sup>5</sup> 9                               | 4.23 | 0.25 | 0     | 0     | 0     | -1.07 | 0     |
| <sup>5</sup> TS <sub>9-10</sub>              | 4.13 | 0.32 | 0     | 0     | 0     | -0.86 | 0     |
| <sup>5</sup> TS <sub>10-</sub>               | 3.76 | 0    | 0     | 0     | 0     | 0     | 0     |
| <sup>11</sup> (dehydrogenation)              | 3.82 | 0    | 0     | 0     | 0     | 0     | 0     |
| <sup>5</sup> 10 <sub>(dehydrogenation)</sub> | 3.82 | 0    | 0     | 0     | 0     | 0     | 0     |
| <sup>5</sup> 10                              |      |      |       |       |       |       |       |

**Table S3.** Spin populations on the key atoms in the stationary point structures along the reaction process of other possible pathways to proceed the first hydrogen atom abstraction from THP catalysed by BBOX.

| Compound                             | Fe   | O     | C3   | N4   | N5 | C6    | C7 |
|--------------------------------------|------|-------|------|------|----|-------|----|
| <sup>5</sup> TS <sub>2-3(C3,π)</sub> | 3.01 | 0.23  | 0.38 | 0.17 | 0  | 0     | 0  |
| <sup>5</sup> TS <sub>2-3(C6,σ)</sub> | 4.03 | 0     | 0    | 0    | 0  | -0.57 | 0  |
| <sup>5</sup> TS <sub>2-3(C6,π)</sub> | 3.05 | 0.36  | 0    | 0    | 0  | 0.53  | 0  |
| <sup>5</sup> 3 <sub>(C3,π)</sub>     | 3.19 | -0.11 | 0.69 | 0    | 0  | 0     | 0  |
| <sup>5</sup> 3 <sub>(C6,σ)</sub>     | 4.12 | 0.36  | 0    | 0    | 0  | -1.04 | 0  |

|                             |      |   |   |   |   |      |   |
|-----------------------------|------|---|---|---|---|------|---|
| ${}^5\mathbf{3}_{(C6,\pi)}$ | 2.86 | 0 | 0 | 0 | 0 | 1.04 | 0 |
|-----------------------------|------|---|---|---|---|------|---|

**Table S4.** Spin populations on the key atoms in the stationary point structures along the reaction process of other possible pathways to generate the C7 methylene radical species in the BBOX catalysed THP process.

| Compound                        | Fe   | O    | C3 | N4 | N5    | C6 | C7    |
|---------------------------------|------|------|----|----|-------|----|-------|
| ${}^5\mathbf{TS}_{4-6}$         | 4.20 | 0.36 | 0  | 0  | -0.32 | 0  | -0.73 |
| ${}^5\mathbf{TS}_{5-6(C7,\pi)}$ | 3.52 | 0.30 | 0  | 0  | 0     | 0  | 0     |
| ${}^5\mathbf{6}_{(C7,\pi)}$     | 2.88 | 0    | 0  | 0  | 0     | 0  | 1.07  |

### Part III Supplementary Figures

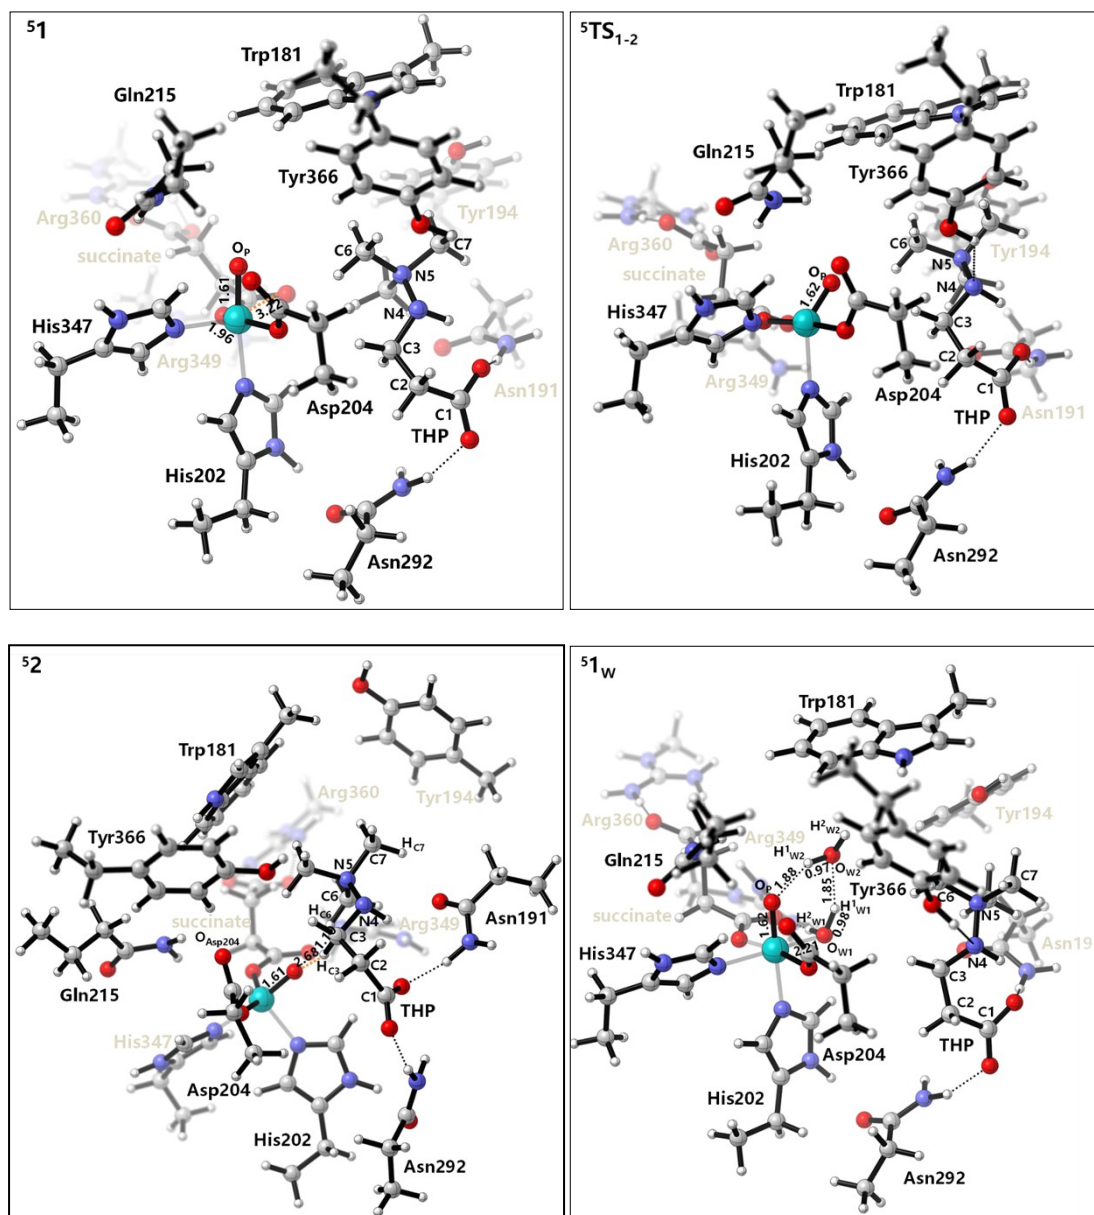

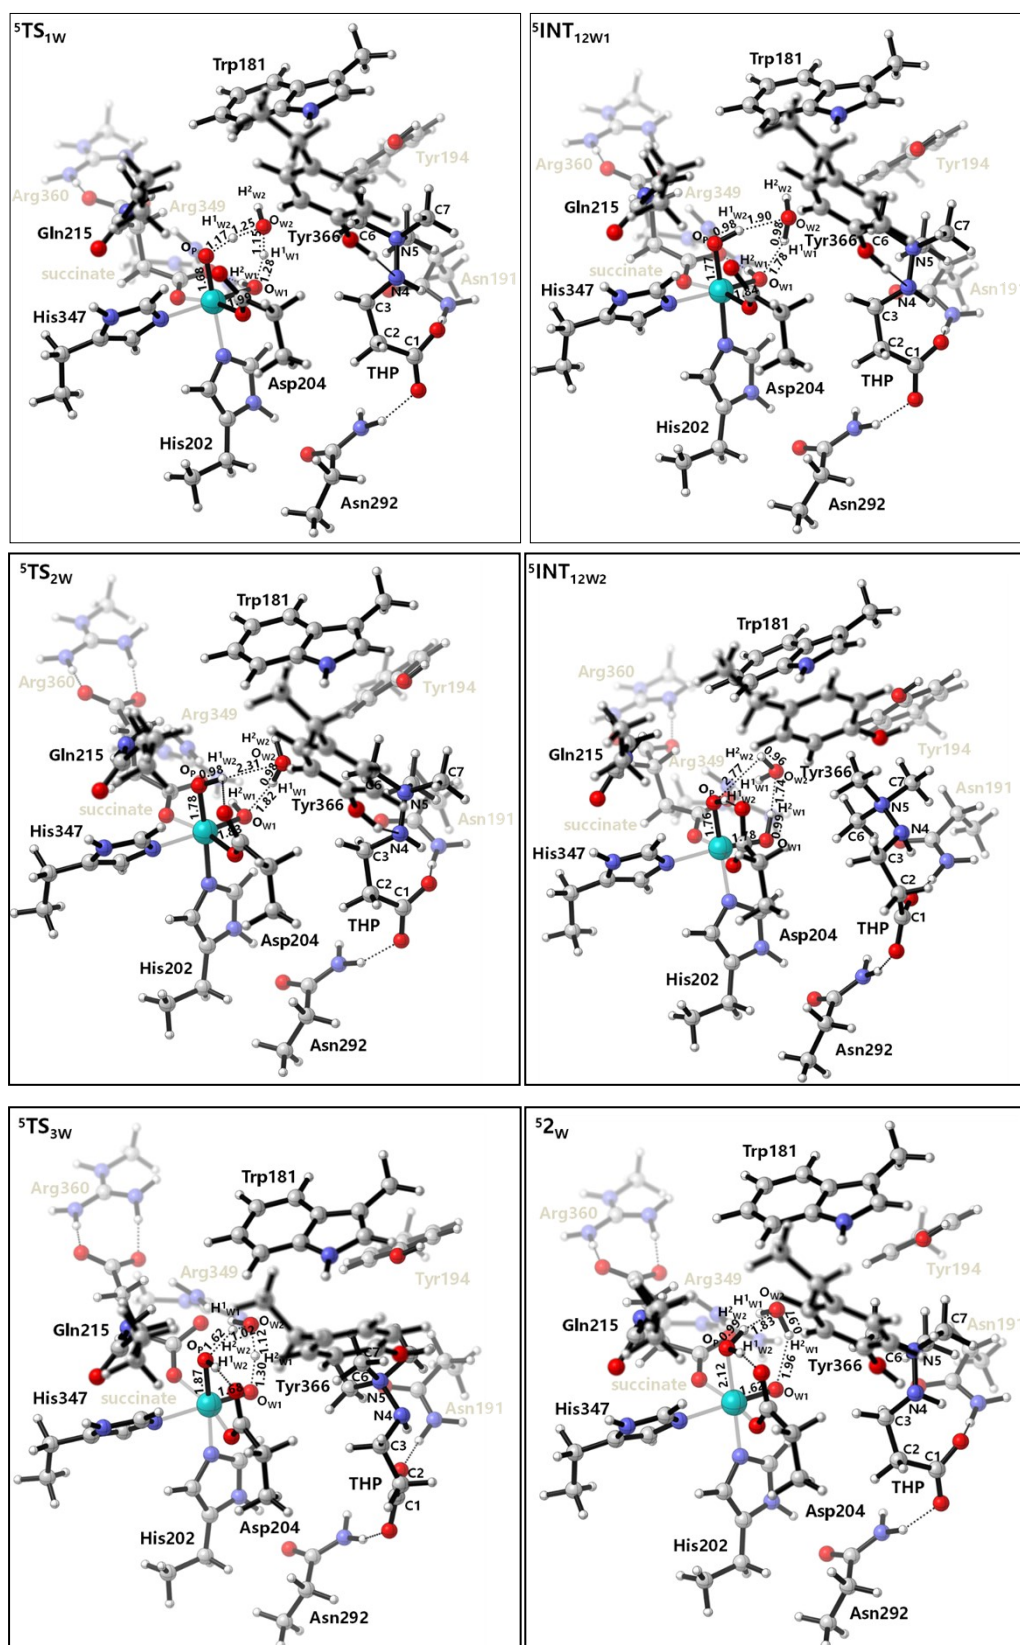

**Figure S1.** The optimized structures of the stationary points along the  $\text{Fe}^{\text{IV}}=\text{O}$  group isomerization process in the quintet spin state of BBOX. Bond lengths are given in Å.

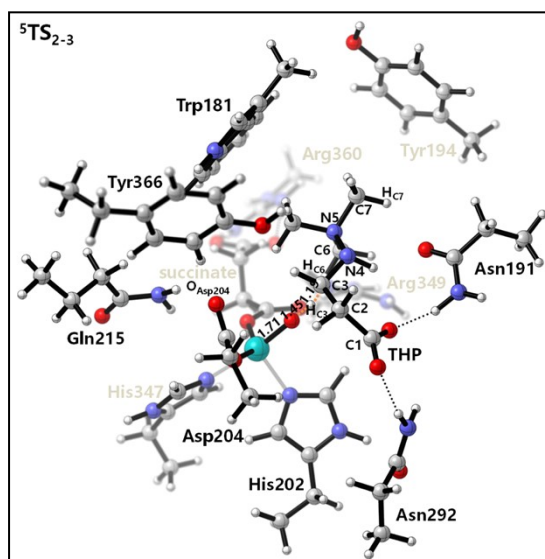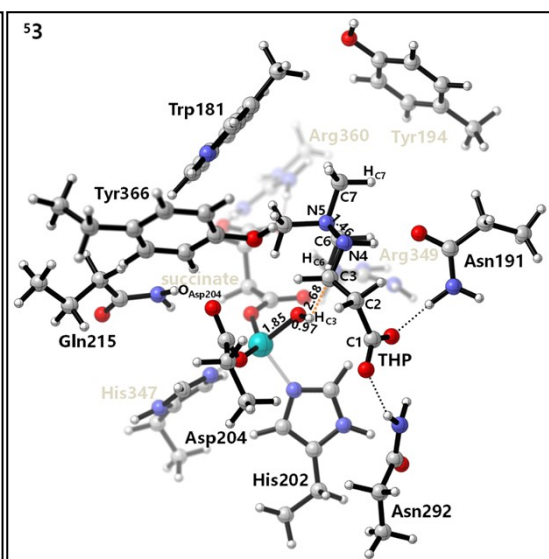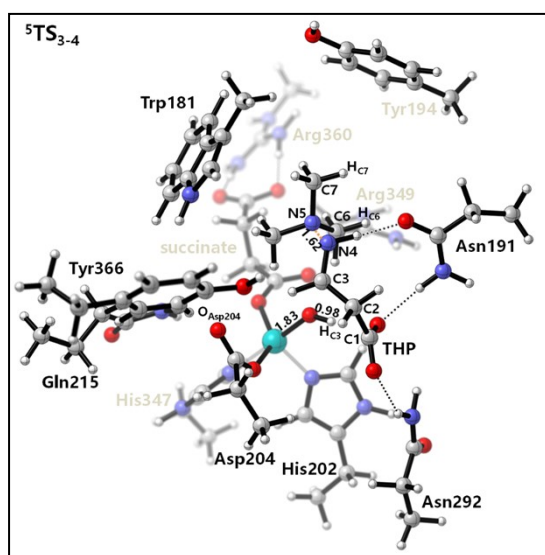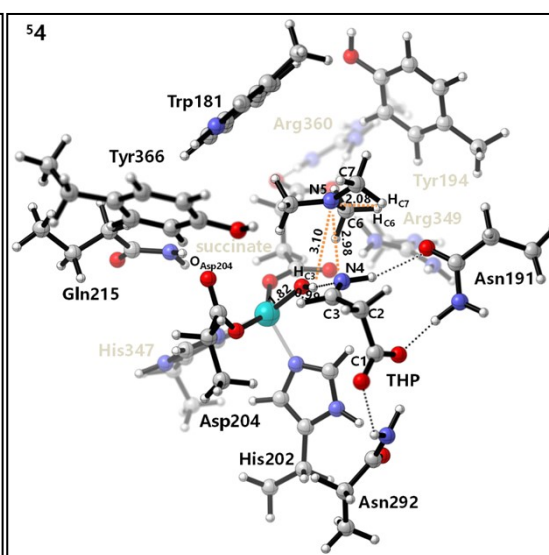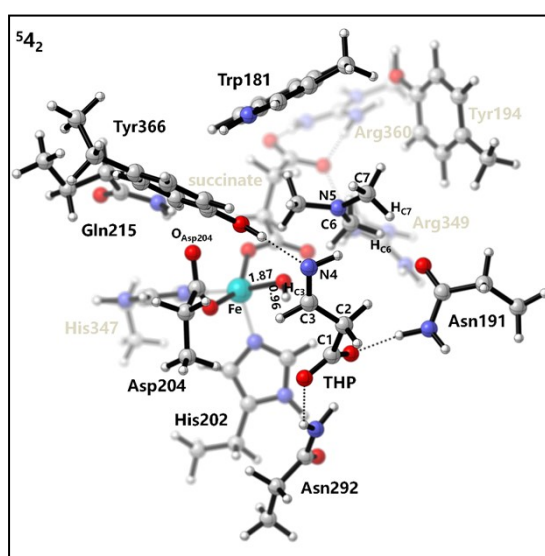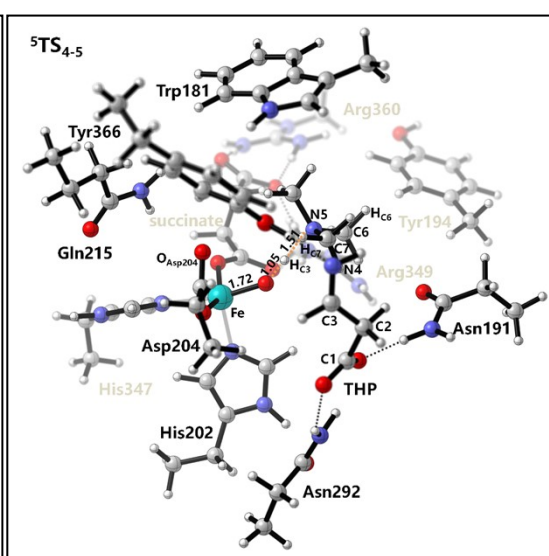

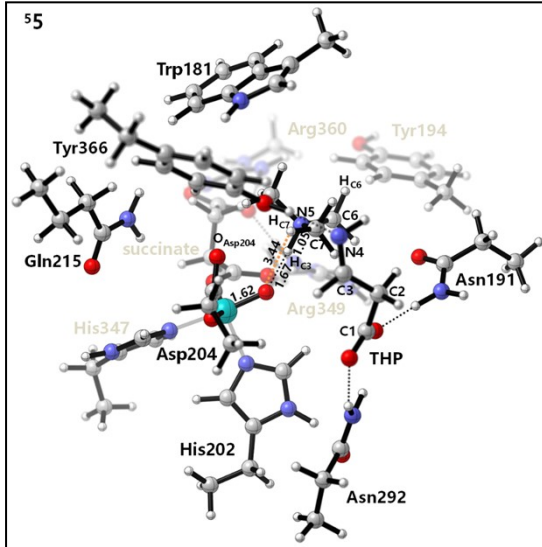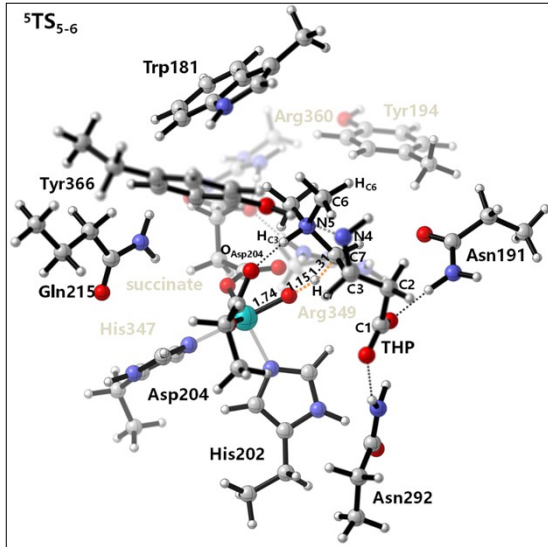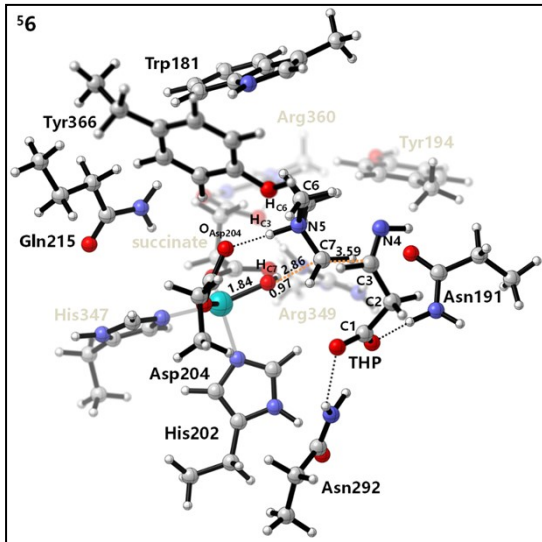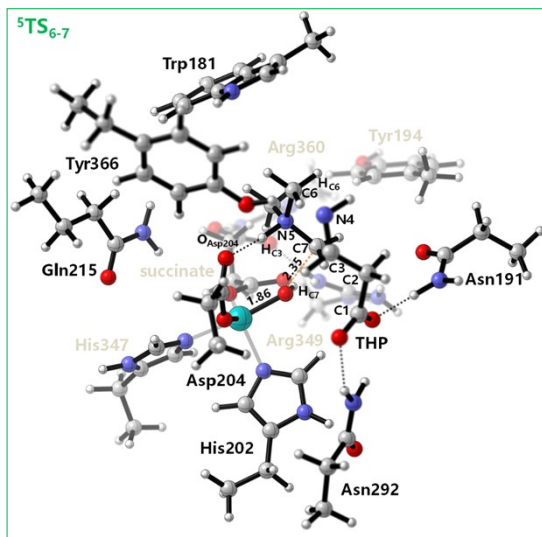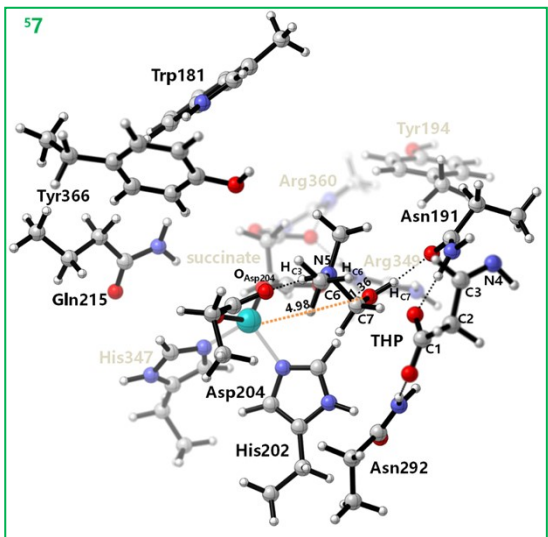

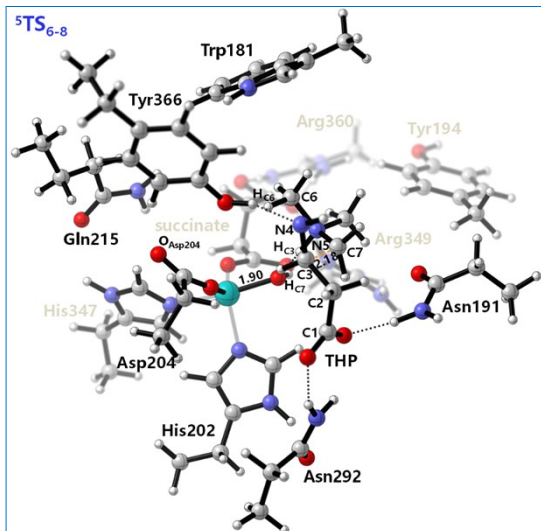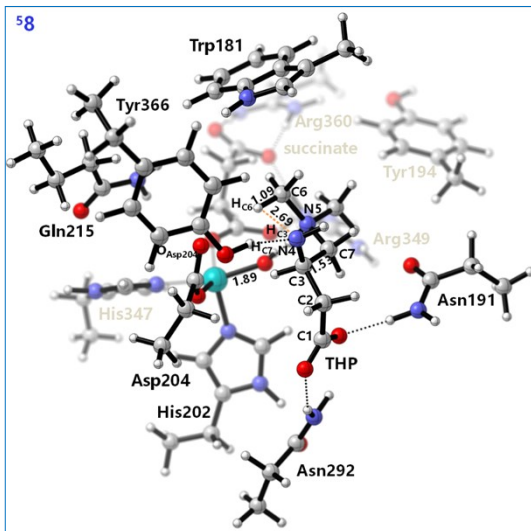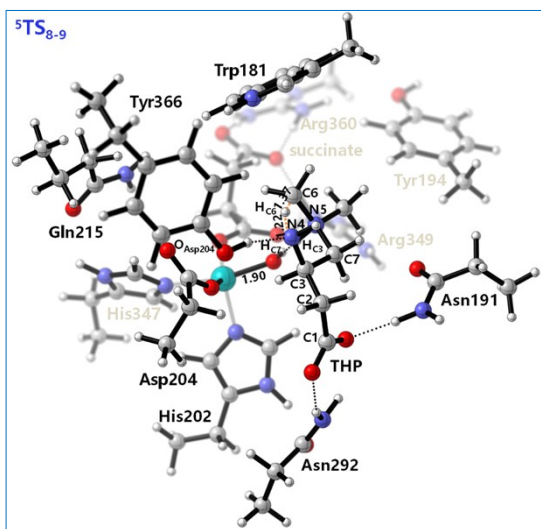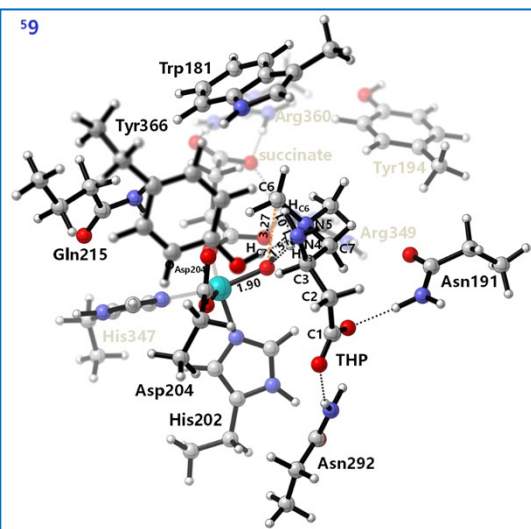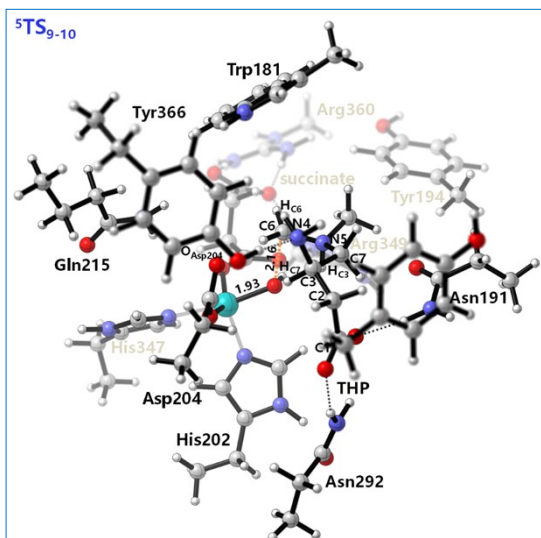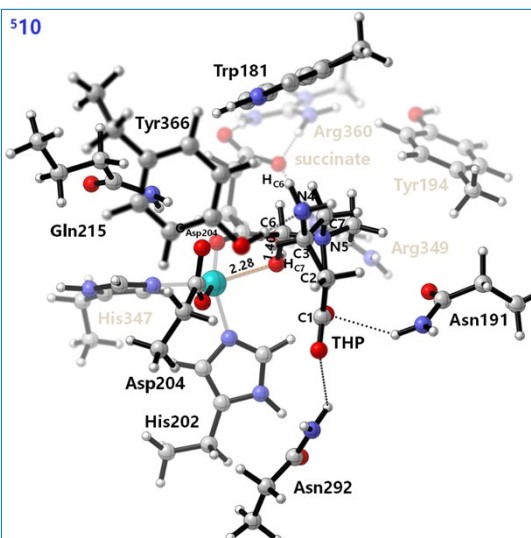



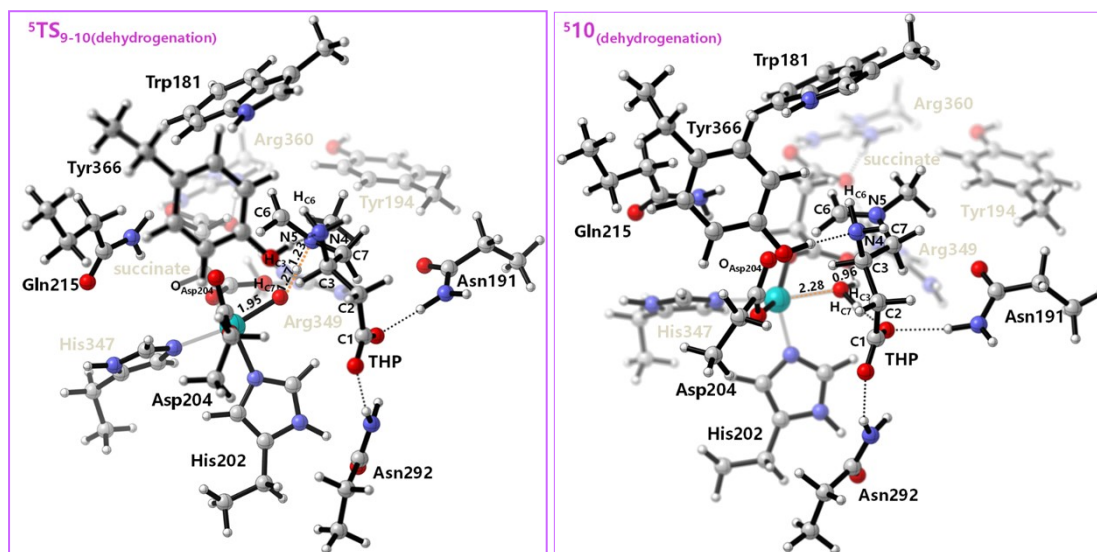

**Figure S2.** The optimized structures of the stationary points along the reaction process of the THP hydroxylation and rearrangement catalysed by BBOX. Bond lengths are given in Å.

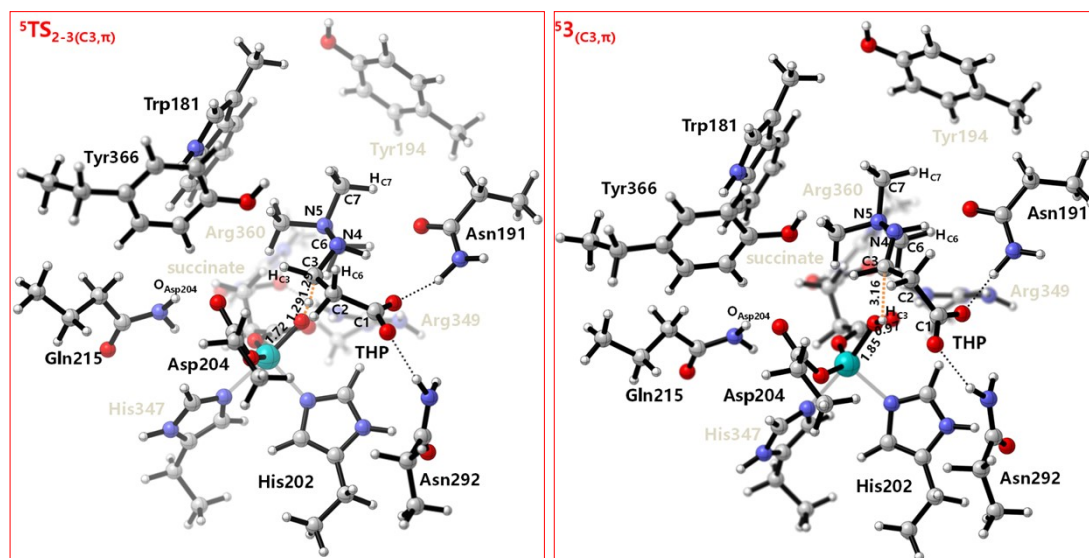

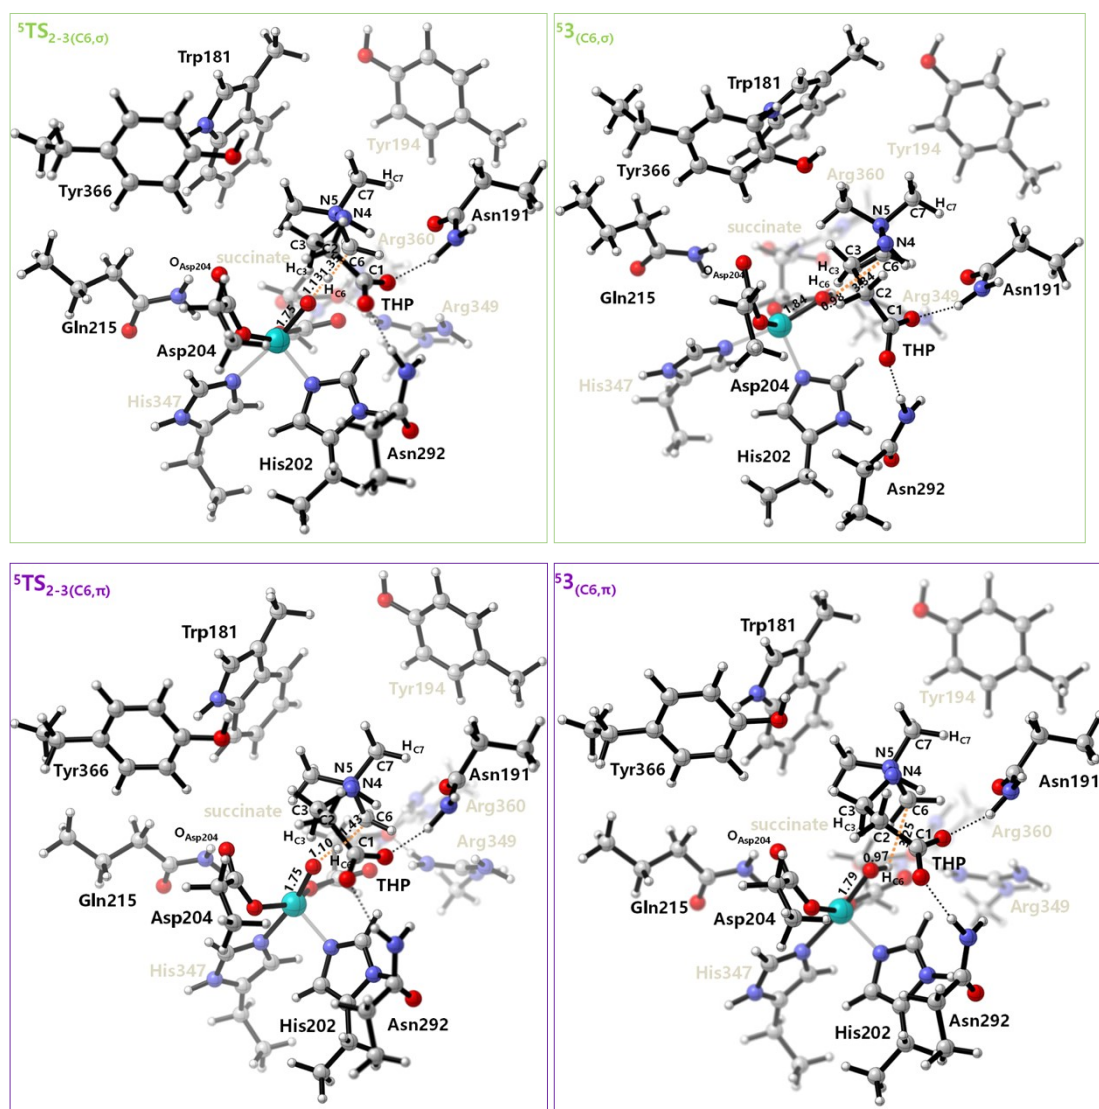

**Figure S3.** The optimized structures of the stationary points along the reaction process of other possible pathways to proceed the first hydrogen atom abstraction from THP catalysed by BBOX. Bond lengths are given in Å.

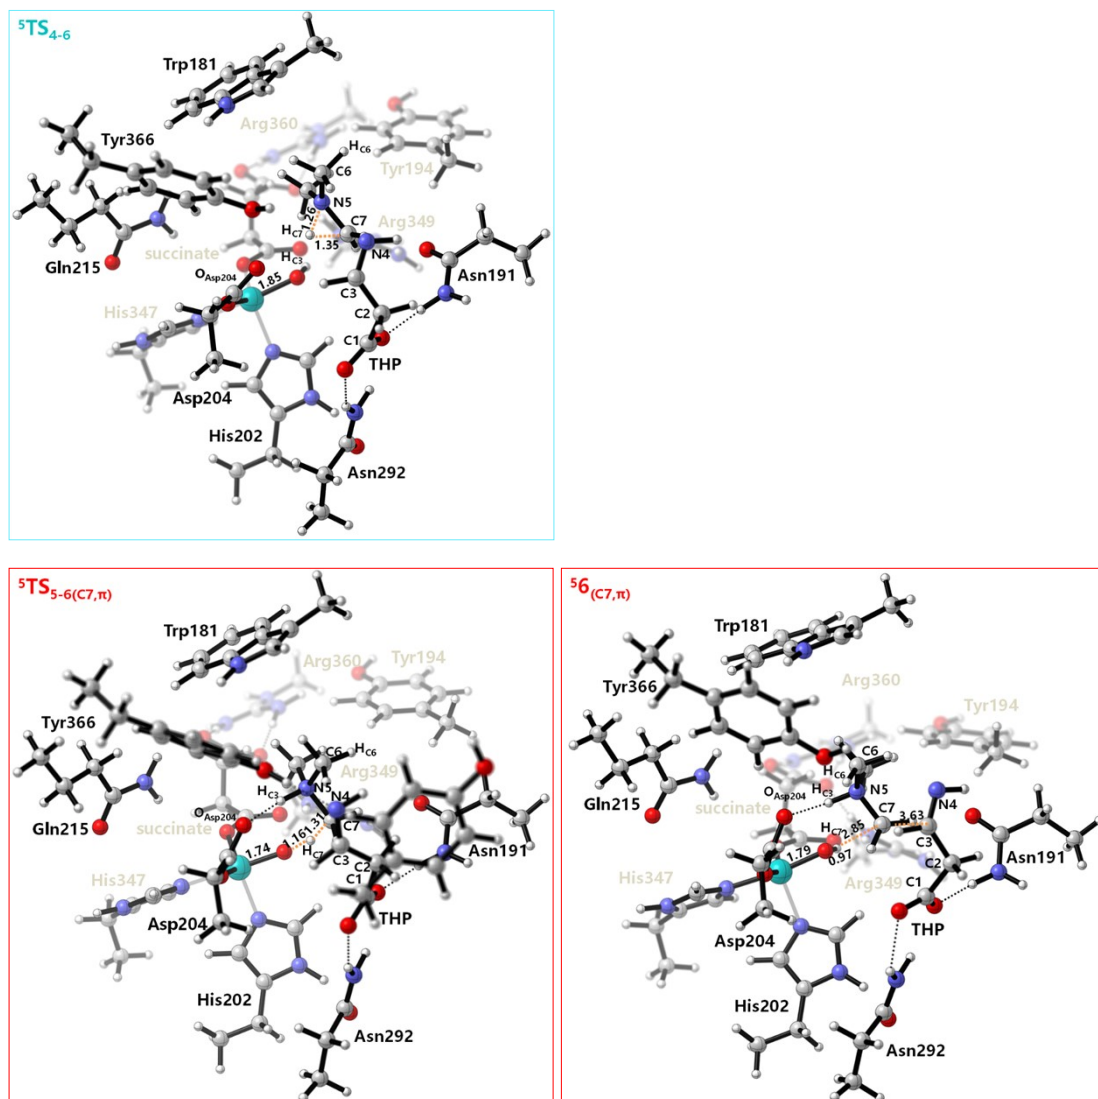

**Figure S4.** The optimized structures of the stationary points along the reaction process of other possible pathways to generate the C7 methylene radical species in BBOX. Bond lengths are given in Å.

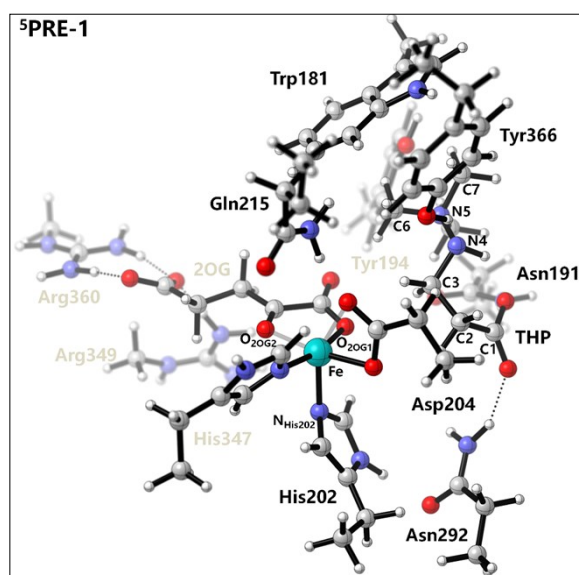

**Figure S5.** The optimized geometry of  $^5\text{PRE-1}$  in the quintet spin state of BBOX.

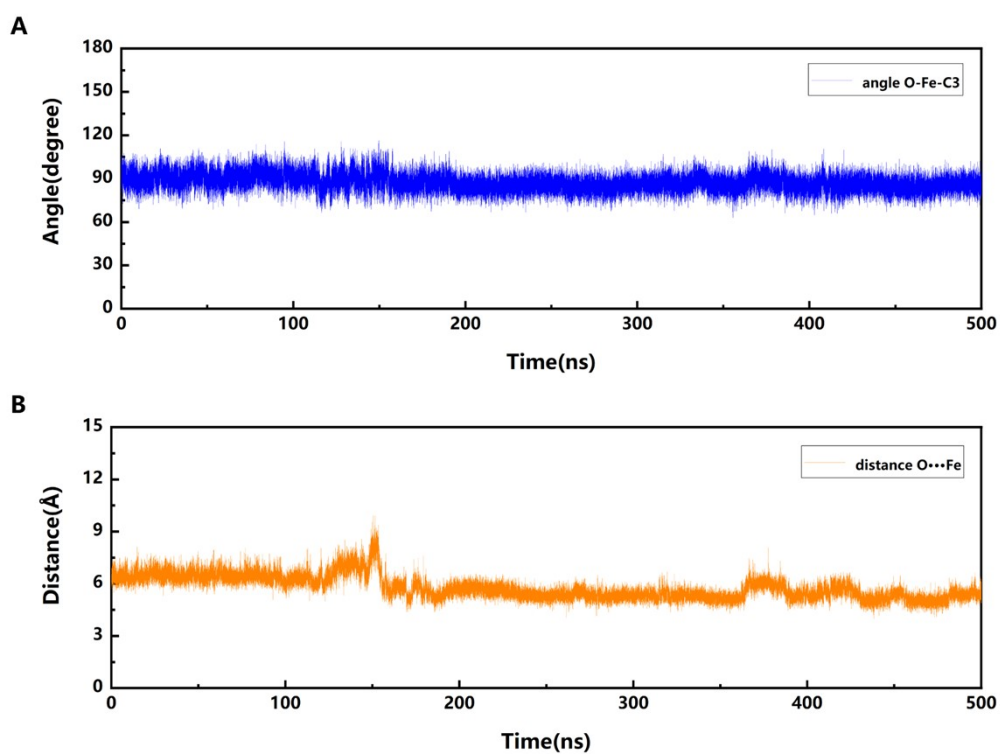

**Figure S6.** (A) Angle variations of O-Fe-C3 and (B) distance variations of O...C3 in 500 ns MD simulations of the BBOX-THP ferryl-oxo complex.

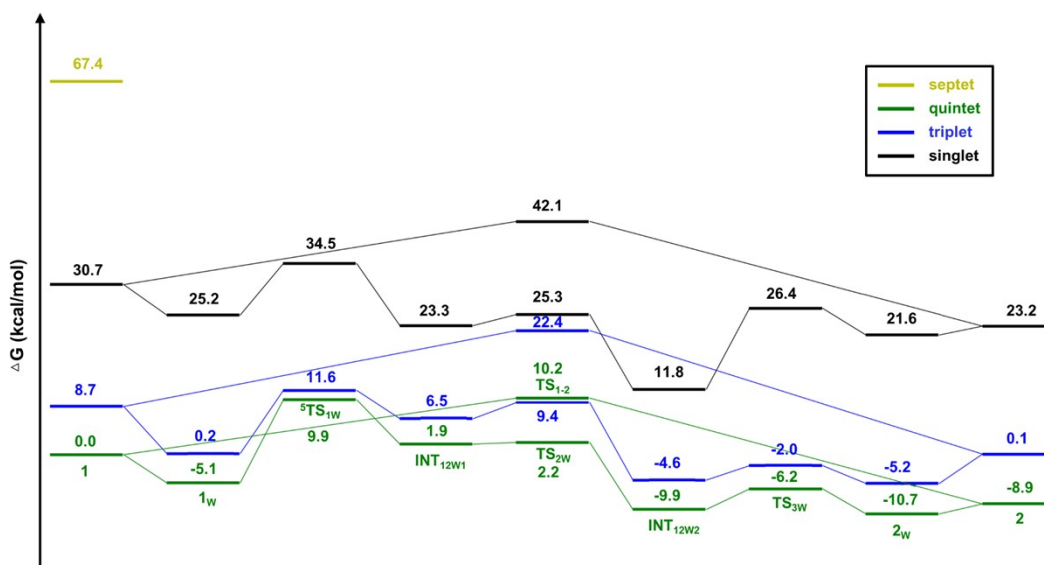

**Figure S7.** Free energy profile of the Fe<sup>IV</sup>=O group isomerization processes in BBOX in different spin states.

#### Part IV DFT calculations of the BBOX-catalysed $\gamma$ -BB hydroxylation

DFT calculations were performed to investigate the hydroxylation mechanism of  $\gamma$ -BB in BBOX. Similar to that of THP, in the first reaction step, the hydrogen atom at C3 position of  $\gamma$ -BB is abstracted by Fe<sup>IV</sup>=O moiety through the  $\sigma$ -channel with an energy barrier of 12.2 kcal/mol. After crossing over the transition state <sup>5</sup>TS<sub>2-3( $\gamma$ -BB)</sub>, it generates the intermediate <sup>5</sup>3<sub>( $\gamma$ -BB)</sub>, which is an exothermic process of 3.9 kcal/mol. In the intermediate <sup>5</sup>3<sub>( $\gamma$ -BB)</sub>, Fe<sup>III</sup>-OH moiety is in complexed with the substrate based C3 radical. In this step, an  $\alpha$  electron is completely transferred from  $\gamma$ -BB to Fe<sup>IV</sup>=O along with the hydrogen transfer, so that in <sup>5</sup>3<sub>( $\gamma$ -BB)</sub>, the spin population on the C3 site is -1.00. From <sup>5</sup>3<sub>( $\gamma$ -BB)</sub>, a very low energy barrier of 1.6 kcal/mol is required for the hydroxyl rebound from Fe<sup>III</sup>-OH to the C3 radical, which forms the hydroxylation product <sup>5</sup>4<sub>( $\gamma$ -BB)</sub>. After crossing over the transition state <sup>5</sup>TS<sub>3-4( $\gamma$ -BB)</sub>, the resulting hydroxylation product <sup>5</sup>4<sub>( $\gamma$ -BB)</sub> energy dropped dramatically by 30.8 kcal/mol from <sup>5</sup>3<sub>( $\gamma$ -BB)</sub>, in which the iron centre of <sup>5</sup>4<sub>( $\gamma$ -BB)</sub> is reduced to a ferrous state. These calculation results indicated that it is conventional for  $\gamma$ -BB to proceed hydroxylation reaction in BBOX, which is distinct from the reaction process of THP in BBOX. The

geometry structures of all the intermediates and transition structures are supplied in supporting information.

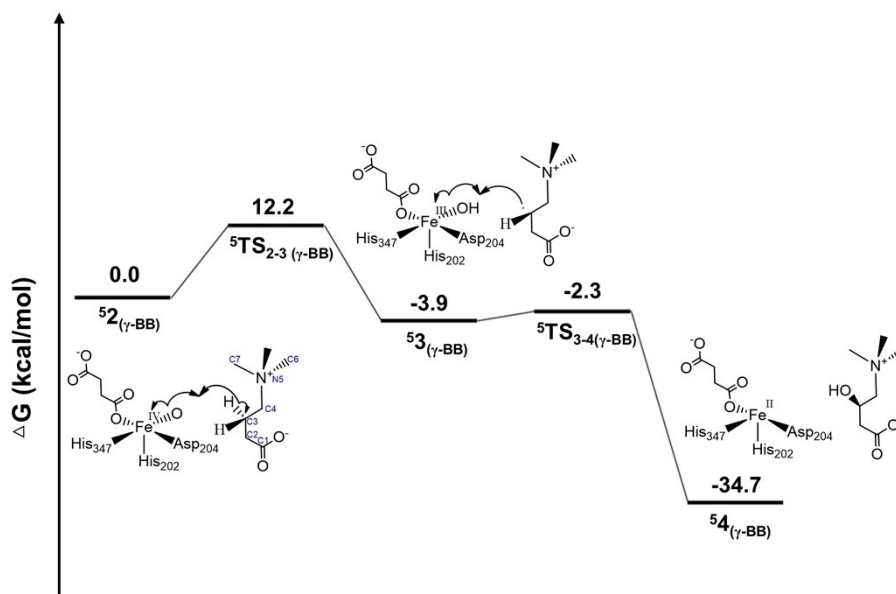

**Figure S8.** Free energy profile of the BBOX-catalysed  $\gamma$ -BB process in the quintet spin state.

**Table S5.** Spin populations on the key atoms in the stationary point structures along the BBOX-catalysed  $\gamma$ -BB process.

| Compound                             | Fe   | O    | C3    | N4 | N5 | C6 | C7 |
|--------------------------------------|------|------|-------|----|----|----|----|
| $52_{(\gamma\text{-BB})}$            | 3.12 | 0.66 | 0     | 0  | 0  | 0  | 0  |
| $5\text{TS}_{2-3(\gamma\text{-BB})}$ | 3.99 | 0    | -0.33 | 0  | 0  | 0  | 0  |
| $53_{(\gamma\text{-BB})}$            | 4.20 | 0.38 | -1.00 | 0  | 0  | 0  | 0  |
| $5\text{TS}_{3-4(\gamma\text{-BB})}$ | 4.13 | 0.32 | -0.81 | 0  | 0  | 0  | 0  |
| $54_{(\gamma\text{-BB})}$            | 3.83 | 0    | 0     | 0  | 0  | 0  | 0  |

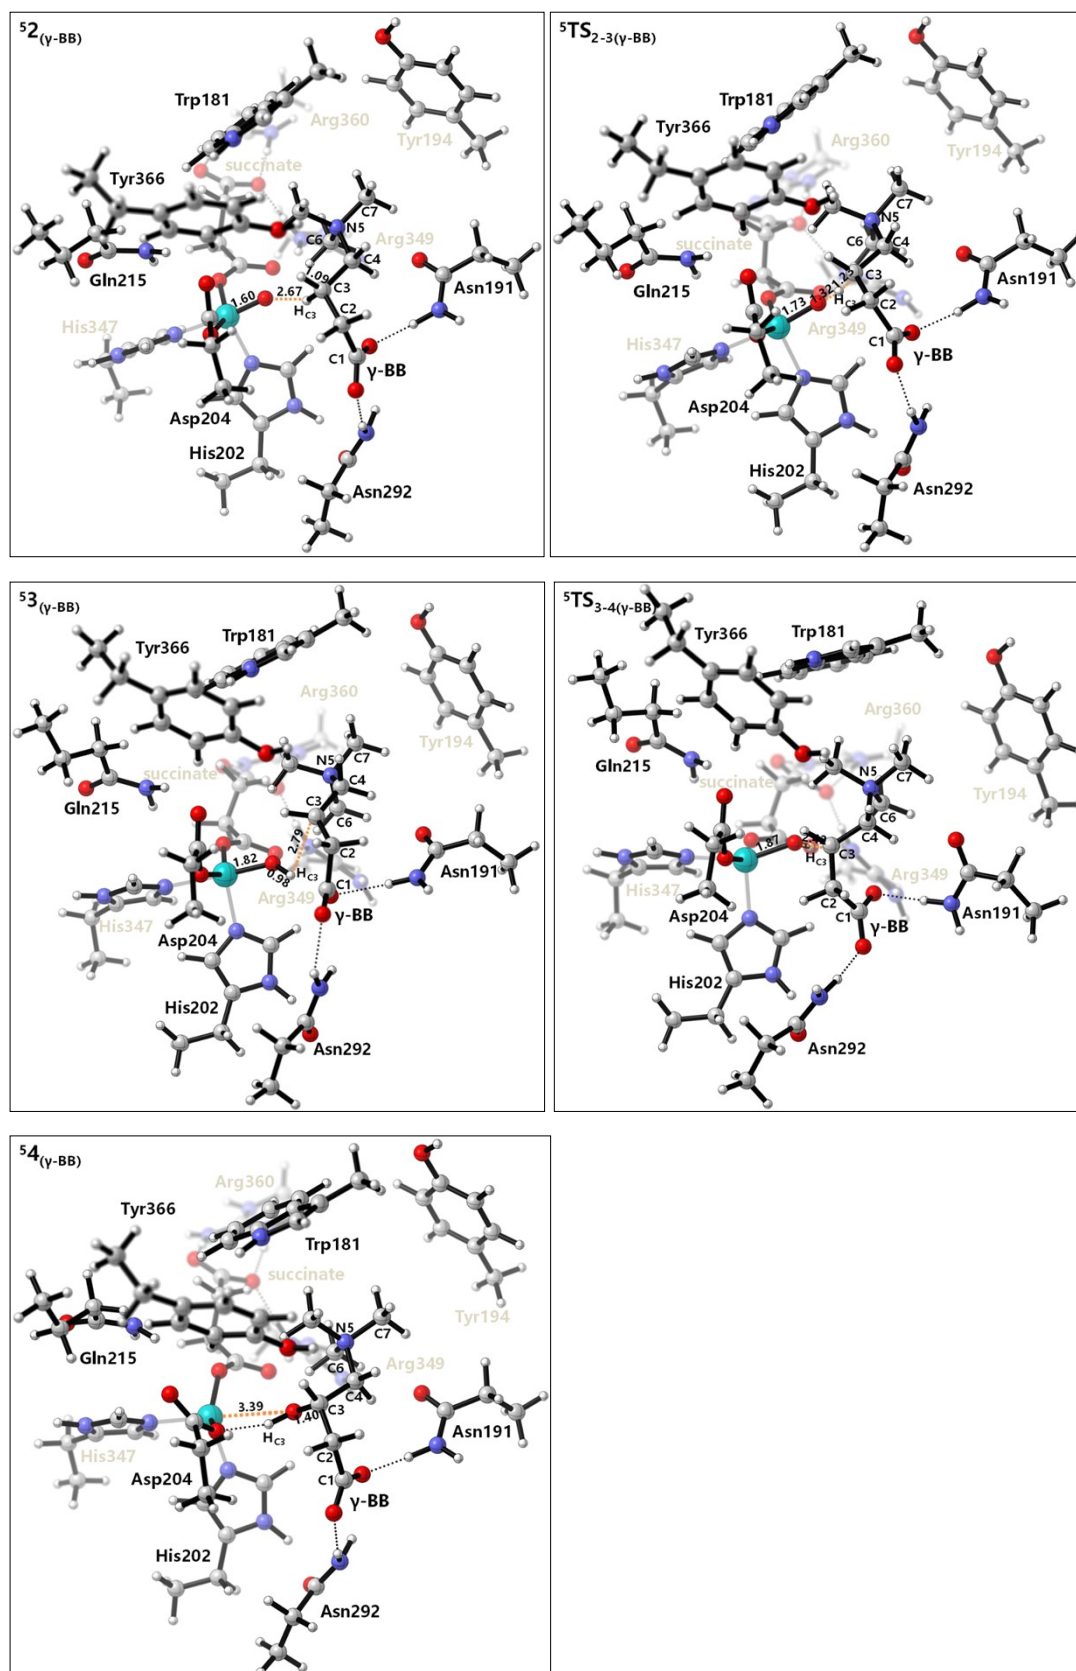

**Figure S9.** The optimized structures of the stationary points along the reaction process of the  $\gamma$ -BB hydroxylation catalysed by BBOX. Bond lengths are given in Å.

## Part V Supplementary coordinates

51

|   |            |            |            |   |            |           |            |
|---|------------|------------|------------|---|------------|-----------|------------|
| C | -1.814061  | 4.858490   | -4.443049  | C | -6.746560  | -8.979388 | -7.206325  |
| C | -3.225867  | 4.350845   | -4.376972  | C | -5.850022  | -8.253871 | -8.215902  |
| C | -3.845549  | 3.725587   | -3.318795  | O | -6.216355  | -8.076977 | -9.387925  |
| C | -4.228774  | 4.464521   | -5.411506  | N | -4.665588  | -7.809287 | -7.771956  |
| N | -5.162931  | 3.447461   | -3.627354  | C | -13.818883 | -3.246498 | -11.396974 |
| C | -5.429413  | 3.887970   | -4.902384  | C | -13.768816 | -1.873268 | -10.711053 |
| C | -4.230342  | 5.000150   | -6.715846  | C | -12.553052 | -1.669733 | -9.855494  |
| C | -6.610476  | 3.837824   | -5.659286  | N | -12.577237 | -1.083100 | -8.602005  |
| C | -5.399966  | 4.949887   | -7.468601  | C | -11.229597 | -1.975309 | -10.074274 |
| C | -6.579285  | 4.374788   | -6.943745  | C | -11.325105 | -1.053150 | -8.108828  |
| C | 1.831980   | -3.590540  | -9.242891  | N | -10.487998 | -1.590641 | -8.979187  |
| C | 0.979203   | -2.875070  | -8.187546  | C | -6.562851  | 0.537435  | -16.697928 |
| C | -0.284385  | -3.645365  | -7.806597  | N | -5.331752  | -0.217010 | -16.943759 |
| O | -1.236506  | -3.719503  | -8.580498  | C | -4.351657  | -0.456883 | -16.055887 |
| N | -0.272919  | -4.211618  | -6.579844  | N | -4.287337  | 0.163623  | -14.889176 |
| C | 1.905864   | 1.096413   | -11.405783 | N | -3.385295  | -1.339685 | -16.403400 |
| C | 1.266596   | 1.355731   | -10.064777 | C | -5.291868  | 5.777453  | -18.230937 |
| C | -0.108889  | 1.583142   | -9.906884  | N | -6.503306  | 5.277888  | -17.585936 |
| C | 2.067867   | 1.394309   | -8.911652  | C | -6.582927  | 4.535408  | -16.455540 |
| C | -0.671703  | 1.824676   | -8.651817  | N | -5.486178  | 4.158166  | -15.791257 |
| C | 1.522898   | 1.628053   | -7.649851  | N | -7.767138  | 4.128143  | -16.007188 |
| C | 0.143307   | 1.834173   | -7.512448  | C | -9.479514  | 3.657314  | 0.535551   |
| O | -0.450234  | 2.031816   | -6.304177  | C | -8.792281  | 2.364712  | 1.018644   |
| C | -10.829837 | -7.503467  | -9.603019  | C | -7.865344  | 1.623397  | 0.075961   |
| C | -9.315549  | -7.318417  | -9.557620  | C | -8.129422  | 1.472612  | -1.295253  |
| C | -8.803781  | -5.907069  | -9.545172  | C | -6.725083  | 0.980240  | 0.585251   |
| N | -7.476808  | -5.648939  | -9.822542  | C | -7.309737  | 0.699416  | -2.120248  |
| C | -9.343308  | -4.685115  | -9.211841  | C | -5.891633  | 0.205280  | -0.223776  |
| C | -7.252414  | -4.330954  | -9.660377  | C | -6.187930  | 0.051978  | -1.583745  |
| N | -8.365472  | -3.712581  | -9.293419  | O | -5.420280  | -0.697545 | -2.423668  |
| C | -8.604137  | -4.296451  | -4.577034  | C | -6.541409  | -0.830134 | -10.695383 |
| C | -8.434059  | -2.779206  | -4.481561  | C | -7.121982  | 1.281960  | -12.041760 |
| C | -8.807476  | -1.997240  | -5.747027  | C | -6.984437  | 2.108085  | -13.325349 |
| O | -8.266204  | -2.450755  | -6.852787  | O | -7.732160  | -1.265571 | -10.445406 |
| O | -9.562701  | -1.038535  | -5.670541  | O | -5.868507  | 2.083181  | -13.969470 |
| C | -12.518629 | 2.821325   | -2.817942  | O | -7.947608  | 2.811831  | -13.678655 |
| C | -12.381688 | 1.896784   | -4.043634  | C | -3.509834  | -5.749545 | -5.289501  |
| C | -11.566528 | 2.514906   | -5.185765  | N | -4.146538  | -2.800626 | -5.356199  |
| C | -11.905658 | 1.969836   | -6.574666  | O | -2.536521  | -4.941899 | -5.169986  |
| O | -12.962589 | 1.410374   | -6.835357  | C | -4.914793  | -5.088754 | -5.240357  |
| N | -10.971228 | 2.234337   | -7.534037  | N | -3.876746  | -1.564348 | -6.075682  |
| C | -7.557068  | -10.112212 | -7.849796  | O | -3.438535  | -6.980229 | -5.433614  |



|    |            |            |            |   |            |           |            |
|----|------------|------------|------------|---|------------|-----------|------------|
| C  | -4.996303  | -3.779936  | -6.039440  | H | 0.217241   | 2.079439  | -5.613622  |
| C  | -2.732416  | -0.927031  | -5.351066  | H | 2.171547   | 1.640938  | -6.770202  |
| C  | -3.513219  | -1.740765  | -7.526875  | H | -1.740842  | 2.005211  | -8.542160  |
| C  | -5.083622  | -0.681580  | -5.967598  | H | 3.144032   | 1.229584  | -8.996521  |
| O  | -8.248825  | -0.160649  | -8.160584  | H | -0.764277  | 1.570170  | -10.780646 |
| Fe | -8.417108  | -1.688907  | -8.647879  | H | 2.577490   | 0.226368  | -11.356273 |
| C  | -6.408202  | -0.078627  | -12.033238 | H | 2.530455   | 1.952228  | -11.710070 |
| H  | -6.822379  | -0.721356  | -12.825767 | H | -8.221340  | 2.603993  | 1.928760   |
| H  | -5.336006  | 0.056818   | -12.213977 | H | -9.574795  | 1.660195  | 1.352396   |
| H  | -9.888724  | 4.084888   | 1.427676   | H | -6.482012  | 1.076445  | 1.645625   |
| H  | -8.783497  | 4.342423   | 0.099195   | H | -9.007689  | 1.944544  | -1.734867  |
| H  | -10.291946 | 3.471825   | -0.174944  | H | -7.554785  | 0.561939  | -3.172368  |
| H  | -12.813459 | 3.777543   | -3.197589  | H | -5.014228  | -0.283391 | 0.207027   |
| H  | -13.292212 | 2.434608   | -2.187761  | H | -4.825458  | -1.262349 | -1.921557  |
| H  | -11.588797 | 2.929959   | -2.250925  | H | -7.482611  | 4.355050  | -7.555925  |
| H  | 2.831309   | -3.210873  | -9.194323  | H | -5.413136  | 5.366558  | -8.477449  |
| H  | 1.465170   | -3.501199  | -10.244141 | H | -7.519993  | 3.395708  | -5.253238  |
| H  | 1.902017   | -4.665571  | -9.017960  | H | -3.327322  | 5.451127  | -7.130337  |
| H  | -14.007776 | -4.045820  | -10.711194 | H | -3.444074  | 3.459804  | -2.344151  |
| H  | -12.927153 | -3.454700  | -11.950497 | H | -5.815557  | 2.979313  | -3.014918  |
| H  | -14.647056 | -3.256576  | -12.121178 | H | -1.286275  | 4.456622  | -5.316911  |
| H  | -11.305692 | -6.917644  | -8.844533  | H | -1.247878  | 4.575066  | -3.545267  |
| H  | -11.242015 | -7.253120  | -10.558175 | H | -7.413849  | -8.217666 | -6.768926  |
| H  | -11.075258 | -8.556457  | -9.410129  | H | -6.137454  | -9.357888 | -6.373424  |
| H  | -6.872641  | -10.810967 | -8.284578  | H | -4.092306  | -7.300074 | -8.434355  |
| H  | -8.191070  | -10.620667 | -7.153940  | H | -4.347439  | -7.755540 | -6.788536  |
| H  | -8.180203  | -9.736916  | -8.667399  | H | -8.926916  | -7.801905 | -8.651999  |
| H  | -8.372860  | -4.770397  | -3.645895  | H | -8.841037  | -7.853552 | -10.391826 |
| H  | -9.595881  | -4.563209  | -4.876553  | H | -10.356506 | -4.448619 | -8.909528  |
| H  | -7.928766  | -4.713763  | -5.332858  | H | -6.785483  | -6.405908 | -9.935305  |
| H  | -2.642892  | -1.571839  | -15.759189 | H | -6.287705  | -3.857489 | -9.807315  |
| H  | -3.477534  | -1.932253  | -17.215576 | H | -13.805366 | -1.081321 | -11.477590 |
| H  | -3.554610  | -0.099761  | -14.244201 | H | -14.670387 | -1.732720 | -10.096657 |
| H  | -4.978656  | 0.882120   | -14.517070 | H | -13.357157 | -0.625597 | -8.140425  |
| H  | -5.303833  | -0.761221  | -17.795652 | H | -10.766604 | -2.440316 | -10.937139 |
| H  | -6.365936  | 1.382212   | -16.034280 | H | -11.032661 | -0.683767 | -7.129347  |
| H  | -6.933133  | 0.913509   | -17.656724 | H | -5.662284  | -5.791335 | -5.624329  |
| H  | -7.851024  | 3.629378   | -15.066196 | H | -5.166165  | -4.891574 | -4.186483  |
| H  | -8.603653  | 4.307457   | -16.543731 | H | -4.661204  | -3.986709 | -7.069684  |
| H  | -4.601301  | 4.616227   | -15.944215 | H | -6.032560  | -3.422670 | -6.096095  |
| H  | -5.579563  | 3.453692   | -15.021835 | H | -3.247367  | -3.308854 | -5.225936  |
| H  | -7.375204  | 5.669252   | -17.917968 | H | -2.781595  | -2.548091 | -7.633492  |
| H  | -5.475707  | 5.862855   | -19.308055 | H | -4.414223  | -1.947713 | -8.105474  |
| H  | -4.465159  | 5.070663   | -18.095992 | H | -3.091902  | -0.800490 | -7.890678  |

|                                     |            |           |            |   |           |           |           |
|-------------------------------------|------------|-----------|------------|---|-----------|-----------|-----------|
| H                                   | -5.933127  | -1.188594 | -6.427515  | C | 2.744171  | 6.162914  | 0.703102  |
| H                                   | -5.276516  | -0.499236 | -4.909530  | C | 1.945000  | 8.345242  | 1.305664  |
| H                                   | -4.890112  | 0.251336  | -6.503961  | C | 1.538782  | 5.891684  | 0.051447  |
| H                                   | -2.566409  | 0.076221  | -5.748321  | C | 0.732327  | 8.089213  | 0.666445  |
| H                                   | -2.987699  | -0.881380 | -4.290238  | C | 0.519476  | 6.851544  | 0.044127  |
| H                                   | -1.841816  | -1.543991 | -5.500643  | O | -0.659534 | 6.530703  | -0.560542 |
| H                                   | -9.050174  | -2.368541 | -3.671730  | C | -0.423695 | -6.796501 | 4.786275  |
| H                                   | -7.389728  | -2.540385 | -4.236162  | C | -0.305128 | -5.338967 | 5.226873  |
| H                                   | -11.950112 | 0.922972  | -3.767622  | C | 0.088688  | -4.333522 | 4.185861  |
| H                                   | -13.387088 | 1.684312  | -4.434207  | N | 0.527168  | -3.076563 | 4.552843  |
| H                                   | -11.764109 | 3.599376  | -5.248698  | C | 0.023973  | -4.302775 | 2.812992  |
| H                                   | -10.486243 | 2.416598  | -5.005794  | C | 0.704901  | -2.341025 | 3.438274  |
| H                                   | -11.111546 | 1.831879  | -8.451336  | N | 0.412481  | -3.056325 | 2.362400  |
| H                                   | -10.012316 | 2.422370  | -7.279577  | C | -4.399729 | -2.842506 | 1.776793  |
| H                                   | -8.191266  | 1.160562  | -11.832784 | C | -4.113026 | -2.193136 | 0.422427  |
| H                                   | -6.716690  | 1.911036  | -11.231447 | C | -2.703344 | -2.373731 | -0.168038 |
| O                                   | -5.561873  | -0.994473 | -9.977046  | O | -1.735180 | -2.491909 | 0.704803  |
| H                                   | -5.023500  | 6.740182  | -17.848791 | O | -2.547791 | -2.386018 | -1.381367 |
| H                                   | -7.302972  | -0.089683 | -16.246516 | C | -4.776566 | -3.701392 | -6.481685 |
| H                                   | -1.800330  | 5.926205  | -4.511525  | C | -3.795813 | -4.052921 | -5.348771 |
| H                                   | 1.218941   | 0.915354  | -12.205932 | C | -2.527829 | -3.189422 | -5.347965 |
| H                                   | 1.593474   | -2.688633 | -7.293902  | C | -1.326420 | -3.844383 | -4.664044 |
| H                                   | 0.659254   | -1.893699 | -8.560557  | O | -1.170647 | -5.056253 | -4.621463 |
| H                                   | 0.544344   | -4.138645 | -5.992583  | N | -0.385919 | -2.974864 | -4.186665 |
| H                                   | -1.100744  | -4.686647 | -6.173943  | C | -2.473439 | -4.412508 | 8.058196  |
|                                     |            |           |            | C | -2.776644 | -3.162185 | 7.222597  |
|                                     |            |           |            | C | -1.563744 | -2.232004 | 7.114084  |
|                                     |            |           |            | O | -0.409130 | -2.685762 | 7.108557  |
|                                     |            |           |            | N | -1.804510 | -0.917547 | 7.003777  |
|                                     |            |           |            | C | 2.064024  | -8.348719 | 0.130356  |
|                                     |            |           |            | C | 1.682331  | -7.705415 | -1.214459 |
|                                     |            |           |            | C | 0.913676  | -6.420300 | -1.085492 |
|                                     |            |           |            | N | -0.270570 | -6.148511 | -1.748852 |
|                                     |            |           |            | C | 1.171362  | -5.283163 | -0.358648 |
|                                     |            |           |            | C | -0.682784 | -4.907420 | -1.418484 |
|                                     |            |           |            | N | 0.172727  | -4.356396 | -0.573941 |
|                                     |            |           |            | C | 8.624279  | -1.140026 | 0.388368  |
|                                     |            |           |            | N | 8.253483  | -0.075093 | 1.338578  |
|                                     |            |           |            | C | 6.967890  | 0.234927  | 1.635791  |
|                                     |            |           |            | N | 6.013740  | 0.079427  | 0.745702  |
|                                     |            |           |            | N | 6.696395  | 0.734614  | 2.864845  |
|                                     |            |           |            | C | 11.406483 | 1.628467  | -3.613864 |
|                                     |            |           |            | N | 10.750624 | 0.342592  | -3.837031 |
|                                     |            |           |            | C | 9.451045  | 0.051605  | -3.581490 |
| <b><sup>5</sup>TS<sub>1-2</sub></b> |            |           |            |   |           |           |           |
| C                                   | -1.922001  | 6.652263  | -4.024128  |   |           |           |           |
| C                                   | -2.226121  | 5.184562  | -4.114128  |   |           |           |           |
| C                                   | -3.459379  | 4.576412  | -4.048336  |   |           |           |           |
| C                                   | -1.272657  | 4.123992  | -4.349457  |   |           |           |           |
| N                                   | -3.332846  | 3.211946  | -4.226114  |   |           |           |           |
| C                                   | -2.005555  | 2.903617  | -4.415466  |   |           |           |           |
| C                                   | 0.127499   | 4.087650  | -4.515547  |   |           |           |           |
| C                                   | -1.377056  | 1.669010  | -4.639861  |   |           |           |           |
| C                                   | 0.752709   | 2.864069  | -4.735167  |   |           |           |           |
| C                                   | 0.006281   | 1.665732  | -4.797875  |   |           |           |           |
| C                                   | 1.081719   | 6.327760  | 5.905001   |   |           |           |           |
| C                                   | 0.176388   | 5.927694  | 4.733022   |   |           |           |           |
| C                                   | -0.452927  | 4.542029  | 4.898300   |   |           |           |           |
| O                                   | 0.180002   | 3.516884  | 4.667658   |   |           |           |           |
| N                                   | -1.749166  | 4.549638  | 5.296734   |   |           |           |           |
| C                                   | 4.258089   | 7.699412  | 2.073052   |   |           |           |           |
| C                                   | 2.971377   | 7.387068  | 1.350004   |   |           |           |           |

|    |           |           |           |   |           |           |           |
|----|-----------|-----------|-----------|---|-----------|-----------|-----------|
| N  | 8.634159  | 0.947766  | -3.031063 | H | -1.061989 | -6.914321 | 3.935566  |
| N  | 8.973196  | -1.164621 | -3.846331 | H | 0.529306  | -7.237507 | 4.580877  |
| C  | -7.609787 | -0.082550 | -6.722895 | H | -0.870954 | -7.378778 | 5.603813  |
| C  | -8.328029 | 0.171693  | -5.386210 | H | -2.159394 | -4.091268 | 9.029689  |
| C  | -7.512359 | 0.479458  | -4.146149 | H | -3.313152 | -5.068549 | 8.154163  |
| C  | -6.167345 | 0.110270  | -3.995964 | H | -1.640274 | -4.980436 | 7.634931  |
| C  | -8.137711 | 1.101559  | -3.051250 | H | -5.394240 | -2.650442 | 2.122028  |
| C  | -5.476344 | 0.330670  | -2.801380 | H | -4.245215 | -3.898487 | 1.703221  |
| C  | -7.461791 | 1.338748  | -1.853967 | H | -3.706131 | -2.474157 | 2.541179  |
| C  | -6.124706 | 0.943783  | -1.723895 | H | 5.764962  | 1.074421  | 3.065629  |
| O  | -5.404284 | 1.149564  | -0.581707 | H | 7.287338  | 0.520842  | 3.655979  |
| C  | 3.136419  | -1.760580 | 0.107054  | H | 5.010881  | -0.030201 | 0.985539  |
| C  | 4.368576  | -1.284029 | -2.105396 | H | 6.227280  | -0.019814 | -0.281930 |
| C  | 5.816353  | -1.043752 | -2.557382 | H | 8.962981  | 0.264105  | 1.973669  |
| O  | 2.092061  | -2.510061 | 0.067266  | H | 8.486449  | -0.826596 | -0.649736 |
| O  | 6.476670  | -0.169340 | -1.882312 | H | 9.668483  | -1.413680 | 0.566611  |
| O  | 6.293708  | -1.668006 | -3.517845 | H | 7.938347  | -1.372215 | -3.749203 |
| C  | -3.701075 | 1.333921  | 5.107652  | H | 9.591922  | -1.901133 | -4.152503 |
| N  | -3.457310 | 1.919412  | 2.152721  | H | 8.886619  | 1.921576  | -2.975492 |
| O  | -3.656514 | 2.554575  | 4.755843  | H | 7.721801  | 0.602454  | -2.625585 |
| C  | -3.674134 | 0.306210  | 3.942667  | H | 11.244841 | -0.311423 | -4.429920 |
| N  | -2.621709 | 2.717878  | 1.261687  | H | 12.477804 | 1.455428  | -3.460943 |
| O  | -3.772330 | 0.898179  | 6.266169  | H | 11.020876 | 2.105824  | -2.705848 |
| C  | -2.813226 | 0.741713  | 2.750016  | H | -1.239005 | 7.297917  | -0.571941 |
| C  | -3.534116 | 3.763678  | 0.695187  | H | -0.051253 | 8.851008  | 0.659637  |
| C  | -1.482737 | 3.390578  | 1.970896  | H | 1.379804  | 4.939615  | -0.454868 |
| C  | -2.106335 | 1.863229  | 0.142876  | H | 2.088567  | 9.313481  | 1.789899  |
| O  | 0.051965  | -0.973962 | -0.439091 | H | 3.521961  | 5.396551  | 0.706793  |
| Fe | 0.162309  | -2.389029 | 0.333769  | H | 4.056859  | 8.023402  | 3.105259  |
| C  | 4.262553  | -2.199626 | -0.850493 | H | 4.789868  | 8.530570  | 1.583269  |
| H  | 4.107268  | -3.239200 | -1.160649 | H | -9.042414 | 0.997219  | -5.534290 |
| H  | 5.197206  | -2.169506 | -0.274340 | H | -8.957045 | -0.707990 | -5.161461 |
| H  | -8.408976 | -0.173454 | -7.429463 | H | -9.184122 | 1.404281  | -3.130676 |
| H  | -6.976919 | 0.732656  | -7.004206 | H | -5.644467 | -0.381534 | -4.815595 |
| H  | -7.030857 | -1.012386 | -6.728629 | H | -4.447526 | -0.004085 | -2.681273 |
| H  | -4.211985 | -3.698477 | -7.390685 | H | -7.975907 | 1.825989  | -1.021909 |
| H  | -5.535425 | -4.453998 | -6.536167 | H | -5.982847 | 1.321673  | 0.167099  |
| H  | -5.244542 | -2.720049 | -6.351018 | H | 0.522866  | 0.721718  | -4.978123 |
| H  | 1.197101  | 7.391420  | 5.925328  | H | 1.835292  | 2.824751  | -4.868329 |
| H  | 2.046041  | 5.865224  | 5.871583  | H | -1.952635 | 0.746002  | -4.695500 |
| H  | 0.618401  | 6.050977  | 6.863964  | H | 0.713376  | 5.007195  | -4.475419 |
| H  | 1.201279  | -8.696457 | 0.659257  | H | -4.440286 | 5.020674  | -3.897691 |
| H  | 2.621176  | -7.682804 | 0.755744  | H | -4.096091 | 2.551316  | -4.214015 |
| H  | 2.701470  | -9.225570 | -0.054868 | H | -1.118170 | 6.851612  | -3.304697 |

|   |           |           |           |           |             |             |             |
|---|-----------|-----------|-----------|-----------|-------------|-------------|-------------|
| H | -2.806807 | 7.225015  | -3.714166 | H         | -0.612504   | 6.685200    | 4.609888    |
| H | -3.064754 | -3.431089 | 6.192012  | H         | 0.750548    | 5.914752    | 3.798441    |
| H | -3.632188 | -2.610706 | 7.637795  | H         | -2.220822   | 5.423065    | 5.478665    |
| H | -0.998298 | -0.311255 | 6.909771  | H         | -2.336440   | 3.700430    | 5.320896    |
| H | -2.718716 | -0.453952 | 6.867921  |           |             |             |             |
| H | -1.273348 | -5.012991 | 5.628601  | <b>52</b> |             |             |             |
| H | 0.396090  | -5.260852 | 6.069458  | C         | 1.55018600  | 7.69905900  | -0.06100900 |
| H | -0.291566 | -5.080470 | 2.127906  | C         | 0.63749600  | 6.72348300  | -0.74866600 |
| H | 0.499914  | -2.749098 | 5.531712  | C         | -0.73270400 | 6.79948800  | -0.85528900 |
| H | 1.042822  | -1.309542 | 3.438633  | C         | 1.03033800  | 5.56184300  | -1.51466600 |
| H | 2.595716  | -7.514419 | -1.801057 | N         | -1.21356300 | 5.76637100  | -1.63347600 |
| H | 1.092403  | -8.418348 | -1.809138 | C         | -0.16018900 | 4.98784800  | -2.05092700 |
| H | -0.700457 | -6.706791 | -2.476613 | C         | 2.26940400  | 4.94963600  | -1.79865600 |
| H | 2.006253  | -5.067077 | 0.296919  | C         | -0.13857000 | 3.83144400  | -2.84568300 |
| H | -1.576636 | -4.427602 | -1.802561 | C         | 2.29161800  | 3.79937500  | -2.58352900 |
| H | -3.301314 | -0.653307 | 4.317352  | C         | 1.09830800  | 3.24567100  | -3.10159500 |
| H | -4.710187 | 0.137250  | 3.608953  | C         | 3.25643600  | 1.40356400  | 8.01089200  |
| H | -1.793610 | 0.950742  | 3.118301  | C         | 2.40646900  | 2.09695300  | 6.93854800  |
| H | -2.741192 | -0.069762 | 2.017305  | C         | 1.58577600  | 1.14476500  | 6.07286000  |
| H | -3.658215 | 2.514807  | 2.987848  | O         | 1.93577100  | 0.90178100  | 4.91398900  |
| H | -1.901890 | 4.031151  | 2.750287  | N         | 0.49219900  | 0.59340600  | 6.62936800  |
| H | -0.836488 | 2.645803  | 2.437515  | C         | 6.96295700  | 2.72245500  | 4.66861400  |
| H | -0.912055 | 3.981973  | 1.252553  | C         | 6.64991400  | 3.74739700  | 3.60016800  |
| H | -1.383890 | 1.142736  | 0.529769  | C         | 6.50898300  | 3.38270300  | 2.25062100  |
| H | -2.959035 | 1.350233  | -0.304900 | C         | 6.48826800  | 5.10603300  | 3.91797300  |
| H | -1.618063 | 2.509524  | -0.591345 | C         | 6.22460400  | 4.32167300  | 1.25763400  |
| H | -2.956686 | 4.425317  | 0.044334  | C         | 6.20117100  | 6.05948100  | 2.93828400  |
| H | -4.319309 | 3.253724  | 0.134139  | C         | 6.06912000  | 5.67313000  | 1.59559200  |
| H | -3.966377 | 4.330843  | 1.525308  | O         | 5.79144900  | 6.55063100  | 0.59489800  |
| H | -4.808447 | -2.560715 | -0.344235 | C         | -4.50425600 | -7.18423400 | 1.54680200  |
| H | -4.280033 | -1.107618 | 0.469804  | C         | -3.68897000 | -6.37365900 | 2.54584400  |
| H | -4.286231 | -3.986785 | -4.365120 | C         | -2.77661300 | -5.33607000 | 1.97171900  |
| H | -3.483019 | -5.100177 | -5.467903 | N         | -1.89386100 | -4.64605500 | 2.78040700  |
| H | -2.197474 | -3.009003 | -6.385914 | C         | -2.67569800 | -4.74386200 | 0.73851600  |
| H | -2.718582 | -2.198378 | -4.914239 | C         | -1.32296900 | -3.66826600 | 2.06189500  |
| H | 0.391691  | -3.373125 | -3.675958 | N         | -1.76719100 | -3.70284500 | 0.80892300  |
| H | -0.647366 | -2.036161 | -3.920611 | C         | -5.74805800 | -0.94675400 | 1.33410500  |
| H | 3.801198  | -1.723095 | -2.934697 | C         | -5.15391200 | 0.13011000  | 0.41134700  |
| H | 3.934315  | -0.298684 | -1.885478 | C         | -3.83393600 | -0.13218800 | -0.32850200 |
| O | 3.296047  | -0.777037 | 0.836358  | O         | -3.42711700 | -1.36732900 | -0.35498400 |
| H | 11.275994 | 2.271949  | -4.458727 | O         | -3.25441700 | 0.79468300  | -0.88795900 |
| H | 7.986613  | -1.973349 | 0.597729  | C         | -5.89840800 | 2.44456600  | -6.25253200 |
| H | -1.610046 | 7.026771  | -4.976742 | C         | -5.32987400 | 1.20975700  | -5.53312900 |
| H | 4.940990  | 6.877594  | 2.129131  | C         | -3.87674500 | 1.36946900  | -5.06330600 |

|   |             |             |             |    |             |             |             |
|---|-------------|-------------|-------------|----|-------------|-------------|-------------|
| C | -3.15920200 | 0.03757900  | -4.82310100 | N  | 0.39018200  | 2.24120600  | 2.20931900  |
| O | -3.24940700 | -0.89378800 | -5.60952200 | O  | -3.60893000 | -0.41285200 | 5.38547700  |
| N | -2.34842000 | -0.00911900 | -3.72636400 | C  | -1.94007800 | 1.63262100  | 2.86721200  |
| C | -5.32559000 | -5.96250500 | 5.83909300  | C  | 1.43815600  | 3.16503200  | 2.75830700  |
| C | -4.92496900 | -4.48915000 | 5.68591900  | C  | 1.02415400  | 0.92764000  | 1.84026400  |
| C | -3.40890700 | -4.26841300 | 5.65128600  | C  | -0.22282300 | 2.87073400  | 0.99705200  |
| O | -2.63497400 | -5.19425700 | 5.34837600  | Fe | -1.64330100 | -2.11232600 | -0.52012800 |
| N | -2.95796100 | -3.03877700 | 5.92786700  | C  | 2.04602800  | -2.74443700 | -2.72723500 |
| C | -2.78888300 | -7.34386200 | -3.67879100 | H  | 1.38034300  | -3.00044200 | -3.55903900 |
| C | -2.68341900 | -6.04631900 | -4.49605800 | H  | 2.64295000  | -3.64145500 | -2.50309200 |
| C | -2.79053700 | -4.82837600 | -3.63208500 | H  | -7.20801700 | 7.23914800  | -4.89598700 |
| N | -3.91086000 | -4.02143000 | -3.55761500 | H  | -5.55042800 | 7.04350400  | -4.37960700 |
| C | -1.93475100 | -4.32533400 | -2.68539800 | H  | -6.46285800 | 5.63842800  | -4.89581600 |
| C | -3.71211300 | -3.08479400 | -2.60867300 | H  | -5.34241500 | 2.60563900  | -7.15263100 |
| N | -2.52110200 | -3.24948500 | -2.05741100 | H  | -6.92489700 | 2.26505800  | -6.49478100 |
| C | 6.45246000  | -5.16218500 | -1.46363700 | H  | -5.83747000 | 3.34888200  | -5.63555700 |
| N | 6.49720500  | -4.49694800 | -0.14721400 | H  | 3.88490300  | 2.13560000  | 8.47386900  |
| C | 5.42730800  | -3.85017900 | 0.38014500  | H  | 3.86137700  | 0.61869800  | 7.60711000  |
| N | 4.54742500  | -3.27258400 | -0.40768000 | H  | 2.62902100  | 0.96024000  | 8.79734100  |
| N | 5.30014300  | -3.80650300 | 1.72671800  | H  | -3.74612000 | -7.44436500 | -3.21131700 |
| C | 10.52821600 | -2.53292300 | -4.27399800 | H  | -2.02133500 | -7.40001700 | -2.93534600 |
| N | 9.33399500  | -3.06710000 | -4.92416000 | H  | -2.66343800 | -8.21218200 | -4.34266700 |
| C | 8.05470300  | -2.72646400 | -4.62793000 | H  | -5.05222600 | -6.57432200 | 0.85933600  |
| N | 7.76810900  | -1.96443600 | -3.57467700 | H  | -3.88587200 | -7.86747000 | 1.00309700  |
| N | 7.04718300  | -3.18504600 | -5.37074800 | H  | -5.23982000 | -7.79144200 | 2.09226600  |
| C | -6.52415200 | 6.60038400  | -4.37609600 | H  | -4.96516400 | -6.32385400 | 6.77990700  |
| C | -7.10750500 | 6.46499700  | -2.94676600 | H  | -6.38500400 | -6.10242400 | 5.78598400  |
| C | -6.15725400 | 6.13193800  | -1.81335900 | H  | -4.86061000 | -6.58431900 | 5.06853500  |
| C | -5.51747500 | 4.88383900  | -1.70625200 | H  | -6.53648400 | -0.49545900 | 1.89969600  |
| C | -5.92988600 | 7.05855800  | -0.78416400 | H  | -6.13553400 | -1.77520700 | 0.77948200  |
| C | -4.70282800 | 4.56371200  | -0.61862000 | H  | -5.00162300 | -1.32102300 | 2.04489000  |
| C | -5.12186800 | 6.75606700  | 0.31568100  | H  | 4.57910700  | -3.22945500 | 2.13967100  |
| C | -4.51151300 | 5.49941800  | 0.41030600  | H  | 5.71128100  | -4.51882000 | 2.31363500  |
| O | -3.72755500 | 5.14032800  | 1.46477400  | H  | 3.60408800  | -2.96938300 | -0.11045100 |
| C | 1.22276800  | -2.46571500 | -1.45233100 | H  | 4.82601800  | -2.93412500 | -1.36963600 |
| C | 2.97492900  | -1.56710500 | -3.13651300 | H  | 7.25076100  | -4.73024800 | 0.48488400  |
| C | 4.33457400  | -2.03764200 | -3.67047100 | H  | 6.61425300  | -4.45990100 | -2.28595200 |
| O | -0.04166400 | -2.30888900 | -1.66362000 | H  | 7.20631500  | -5.95498000 | -1.48342400 |
| O | 5.23481700  | -2.27272700 | -2.77973500 | H  | 6.06527100  | -2.81924900 | -5.21887300 |
| O | 4.52865000  | -2.17740400 | -4.88726500 | H  | 7.22087000  | -3.82060200 | -6.13537800 |
| C | -2.59970100 | 0.08788700  | 4.85326900  | H  | 8.49366000  | -1.49785000 | -3.05493000 |
| N | -0.60489500 | 2.09236700  | 3.27929300  | H  | 6.77039400  | -1.96804900 | -3.22609700 |
| O | -1.41905100 | -0.37654500 | 4.85712200  | H  | 9.48045300  | -3.48383500 | -5.83449800 |
| C | -2.80892700 | 1.43117800  | 4.11501000  | H  | 11.35063200 | -3.24411200 | -4.41017700 |

|   |             |             |             |                       |             |             |             |
|---|-------------|-------------|-------------|-----------------------|-------------|-------------|-------------|
| H | 10.37050400 | -2.42199800 | -3.19538900 | H                     | 1.77911500  | 1.10636900  | 1.06741000  |
| H | 5.75112800  | 7.44583000  | 0.94441700  | H                     | -0.90803100 | 2.16703100  | 0.52344800  |
| H | 6.08393900  | 7.10911600  | 3.21986000  | H                     | -0.74850900 | 3.77875200  | 1.29809400  |
| H | 6.12597800  | 4.02338700  | 0.21355000  | H                     | 0.58016100  | 3.12204900  | 0.29978900  |
| H | 6.59244500  | 5.43578400  | 4.95410200  | H                     | 2.19825400  | 3.33684300  | 1.98965500  |
| H | 6.62999900  | 2.33590000  | 1.96184500  | H                     | 0.94997700  | 4.10251600  | 3.03601300  |
| H | 6.13545200  | 2.62281000  | 5.38582100  | H                     | 1.88227000  | 2.68015500  | 3.63179400  |
| H | 7.85766300  | 3.00484500  | 5.24333200  | H                     | -5.88191300 | 0.40694100  | -0.36960100 |
| H | -7.60232300 | 7.41329400  | -2.69130100 | H                     | -4.98667500 | 1.05835900  | 0.97364400  |
| H | -7.91625100 | 5.71594200  | -2.96591100 | H                     | -5.96220300 | 0.94785200  | -4.66811600 |
| H | -6.40765200 | 8.03963000  | -0.82664100 | H                     | -5.37261300 | 0.34997300  | -6.21787700 |
| H | -5.67637800 | 4.12762900  | -2.47678400 | H                     | -3.28748900 | 1.86790900  | -5.85193300 |
| H | -4.23492400 | 3.58337700  | -0.54610800 | H                     | -3.81582500 | 2.01665600  | -4.17729000 |
| H | -4.98016000 | 7.49832200  | 1.10572600  | H                     | -1.86577500 | -0.88385400 | -3.56279400 |
| H | -3.75017500 | 5.82904200  | 2.13567300  | H                     | -2.51197200 | 0.56616100  | -2.90328700 |
| H | 1.14314800  | 2.34610600  | -3.71746800 | H                     | 2.47983900  | -0.95540200 | -3.90045900 |
| H | 3.24553600  | 3.32053200  | -2.81277300 | H                     | 3.17313200  | -0.92720800 | -2.26581800 |
| H | -1.05523000 | 3.40414700  | -3.24940600 | O                     | 1.78973200  | -2.44705000 | -0.35711100 |
| H | 3.19760600  | 5.37382200  | -1.41433100 | H                     | 10.79815200 | -1.59548700 | -4.71354300 |
| H | -1.41693200 | 7.53244300  | -0.43758000 | H                     | 5.47100800  | -5.58303700 | -1.53048300 |
| H | -2.19076900 | 5.58697500  | -1.81450300 | H                     | 2.07428900  | 8.27655000  | -0.79372900 |
| H | 2.29531200  | 7.19135900  | 0.56702000  | H                     | 7.14099800  | 1.75972100  | 4.23672800  |
| H | 0.98617000  | 8.39240700  | 0.57688200  | H                     | 1.73597800  | 2.82893500  | 7.41674800  |
| H | -5.32462500 | -4.06345300 | 4.74920000  | H                     | 3.05689400  | 2.65449200  | 6.25396800  |
| H | -5.36161600 | -3.87805200 | 6.48964500  | H                     | 0.18703700  | 0.87890300  | 7.54875000  |
| H | -1.96577100 | -2.87393500 | 5.79716100  | H                     | -0.18552300 | 0.08397100  | 6.02883400  |
| H | -3.49052200 | -2.15011300 | 5.89432500  | O                     | -0.97721400 | -1.10617600 | 0.54082500  |
| H | -4.37280600 | -5.84499600 | 3.22194100  |                       |             |             |             |
| H | -3.10717500 | -7.04587600 | 3.19252000  |                       |             |             |             |
| H | -3.20645300 | -4.97775900 | -0.17526400 |                       |             |             |             |
| H | -1.84752000 | -4.80841700 | 3.80496500  |                       |             |             |             |
| H | -0.63224800 | -2.93465700 | 2.46200600  |                       |             |             |             |
| H | -1.72228600 | -6.01898100 | -5.03007100 |                       |             |             |             |
| H | -3.46044400 | -6.01960300 | -5.27371900 |                       |             |             |             |
| H | -4.70945800 | -4.05706900 | -4.17807400 |                       |             |             |             |
| H | -0.94472800 | -4.67070600 | -2.41511400 |                       |             |             |             |
| H | -4.42770000 | -2.31735200 | -2.34340100 |                       |             |             |             |
| H | -3.86618500 | 1.51135700  | 3.83453500  |                       |             |             |             |
| H | -2.61530700 | 2.25085300  | 4.82651200  |                       |             |             |             |
| H | -1.90857600 | 0.70058900  | 2.28197000  |                       |             |             |             |
| H | -2.40361500 | 2.41047900  | 2.25316600  |                       |             |             |             |
| H | -0.21660500 | 1.38063800  | 3.90823400  |                       |             |             |             |
| H | 1.47999700  | 0.51946200  | 2.74655600  |                       |             |             |             |
| H | 0.25565100  | 0.25374700  | 1.45281400  |                       |             |             |             |
|   |             |             |             | <b>51<sub>w</sub></b> |             |             |             |
|   |             |             |             | C                     | -1.81307200 | 4.85847600  | -4.44308700 |
|   |             |             |             | C                     | -3.21617500 | 4.36515500  | -4.23234000 |
|   |             |             |             | C                     | -3.73628400 | 3.75179800  | -3.11462800 |
|   |             |             |             | C                     | -4.31974700 | 4.50874600  | -5.15512600 |
|   |             |             |             | N                     | -5.08443900 | 3.50173000  | -3.28644100 |
|   |             |             |             | C                     | -5.47419800 | 3.96143100  | -4.52301000 |
|   |             |             |             | C                     | -4.44738600 | 5.06380100  | -6.44555000 |
|   |             |             |             | C                     | -6.73406300 | 3.96325800  | -5.14289700 |
|   |             |             |             | C                     | -5.69492700 | 5.06746100  | -7.06171500 |
|   |             |             |             | C                     | -6.82796600 | 4.52458600  | -6.41403800 |
|   |             |             |             | C                     | 1.83200100  | -3.59051400 | -9.24292100 |
|   |             |             |             | C                     | 0.94783700  | -2.87015400 | -8.21425900 |
|   |             |             |             | C                     | -0.29467300 | -3.65547300 | -7.78072000 |
|   |             |             |             | O                     | -1.40016300 | -3.43189600 | -8.26554000 |
|   |             |             |             | N                     | -0.08214400 | -4.57849800 | -6.81005700 |

|   |              |              |              |    |              |             |              |
|---|--------------|--------------|--------------|----|--------------|-------------|--------------|
| C | 1.90586900   | 1.09655700   | -11.40579700 | N  | -6.63893100  | 5.40135700  | -17.81668900 |
| C | 1.22235300   | 1.28705800   | -10.07176000 | C  | -6.97016300  | 4.76711500  | -16.66507800 |
| C | -0.15649500  | 1.08606800   | -9.89987100  | N  | -6.04202100  | 4.42307300  | -15.77492000 |
| C | 1.96877300   | 1.65513000   | -8.94013500  | N  | -8.24073700  | 4.44783100  | -16.41934300 |
| C | -0.77211400  | 1.22851700   | -8.65402900  | C  | -9.47984800  | 3.65731300  | 0.53547800   |
| C | 1.37245500   | 1.79673300   | -7.68662200  | C  | -8.80281500  | 2.37825200  | 1.06270400   |
| C | -0.00314900  | 1.57405300   | -7.53723800  | C  | -8.00115900  | 1.48893900  | 0.13345600   |
| O | -0.62918200  | 1.66400000   | -6.32470600  | C  | -8.14781300  | 1.48317400  | -1.26137800  |
| C | -10.82986500 | -7.50366900  | -9.60299200  | C  | -7.11021900  | 0.55551900  | 0.69318000   |
| C | -9.31270800  | -7.34156500  | -9.56680800  | C  | -7.45215800  | 0.57680700  | -2.06826300  |
| C | -8.76495400  | -5.94411900  | -9.55703600  | C  | -6.40345000  | -0.35187000 | -0.09502300  |
| N | -7.41763400  | -5.73324500  | -9.76796400  | C  | -6.58096100  | -0.34876000 | -1.48430700  |
| C | -9.27819900  | -4.70290000  | -9.26048700  | O  | -5.91119400  | -1.21083200 | -2.30750700  |
| C | -7.15296200  | -4.42667500  | -9.59028600  | C  | -7.71072800  | -0.72115900 | -11.61495300 |
| N | -8.26201600  | -3.76511700  | -9.29122500  | C  | -8.22870100  | 1.67113200  | -12.35658700 |
| C | -8.60422900  | -4.29638400  | -4.57712300  | C  | -7.99491500  | 2.54194400  | -13.59715500 |
| C | -8.45807400  | -2.77570300  | -4.47760600  | O  | -8.46516300  | -1.22024100 | -10.74116500 |
| C | -8.73872100  | -1.95378900  | -5.75002700  | O  | -6.82166300  | 2.47058000  | -14.11989100 |
| O | -8.26180700  | -2.45588400  | -6.85642500  | O  | -8.89958200  | 3.26661400  | -14.04204400 |
| O | -9.35951100  | -0.90196000  | -5.65160700  | C  | -3.15730500  | -5.88848100 | -5.15880800  |
| C | -12.51896100 | 2.82123700   | -2.81796400  | N  | -3.46215800  | -3.01905500 | -4.29176400  |
| C | -12.39578500 | 1.88338200   | -4.03611700  | O  | -2.08687300  | -5.25193500 | -4.89884100  |
| C | -11.61309800 | 2.48720500   | -5.20719600  | C  | -4.46584200  | -5.04919600 | -5.12794300  |
| C | -11.94594400 | 1.87384100   | -6.56923800  | N  | -2.83269600  | -1.72127300 | -4.52904000  |
| O | -12.99659600 | 1.28994200   | -6.79905100  | O  | -3.25561300  | -7.09662500 | -5.41718700  |
| N | -11.01812900 | 2.10832900   | -7.54326500  | C  | -4.26266700  | -3.55557500 | -5.40619000  |
| C | -7.55702200  | -10.11224600 | -7.84979500  | C  | -2.23178500  | -1.33028900 | -3.21423700  |
| C | -6.73547300  | -8.99712400  | -7.18798100  | C  | -1.75440200  | -1.76739700 | -5.57239700  |
| C | -5.81252100  | -8.28758400  | -8.18198300  | C  | -3.87171500  | -0.71235800 | -4.91186200  |
| O | -6.14383000  | -8.14192400  | -9.36824100  | O  | -8.26073300  | -0.17235900 | -8.27485600  |
| N | -4.64898800  | -7.81135400  | -7.71500100  | Fe | -8.32122000  | -1.73598800 | -8.69239600  |
| C | -13.81906400 | -3.24656400  | -11.39713000 | C  | -8.38296400  | 0.15497700  | -12.68172600 |
| C | -13.73514200 | -1.89551800  | -10.66517300 | H  | -9.44548900  | -0.10482900 | -12.75172500 |
| C | -12.52649400 | -1.76417400  | -9.78117600  | H  | -7.92394200  | -0.07982800 | -13.64967000 |
| N | -12.53600600 | -1.18896500  | -8.52086600  | H  | -9.88853900  | 4.08495300  | 1.42772900   |
| C | -11.21485100 | -2.11935500  | -9.99155400  | H  | -8.78344100  | 4.34239700  | 0.09924400   |
| C | -11.28246000 | -1.21364600  | -8.02315600  | H  | -10.29288900 | 3.45707700  | -0.16995800  |
| N | -10.46110000 | -1.77489900  | -8.89192700  | H  | -12.81326500 | 3.77758800  | -3.19762700  |
| C | -6.56285500  | 0.53748100   | -16.69789400 | H  | -13.29215300 | 2.43461100  | -2.18768800  |
| N | -5.24352000  | -0.01941500  | -16.35076300 | H  | -11.58638900 | 2.92619600  | -2.25471900  |
| C | -4.91612000  | -0.41555000  | -15.09722100 | H  | 2.83131500   | -3.21089300 | -9.19429300  |
| N | -5.43240500  | 0.17071500   | -14.04112300 | H  | 1.46514100   | -3.50120500 | -10.24413100 |
| N | -4.00932500  | -1.41344400  | -14.95802200 | H  | 1.90197600   | -4.66532900 | -9.01810100  |
| C | -5.29194900  | 5.77743700   | -18.23093300 | H  | -14.00771000 | -4.04579600 | -10.71114800 |

|   |              |              |              |   |              |             |              |
|---|--------------|--------------|--------------|---|--------------|-------------|--------------|
| H | -12.92709400 | -3.45465000  | -11.95041900 | H | -5.68922500  | 3.07088400  | -2.60249900  |
| H | -14.65172700 | -3.22791500  | -12.11471200 | H | -1.38391000  | 4.46310800  | -5.37314600  |
| H | -11.30566200 | -6.91753700  | -8.84459600  | H | -1.15567100  | 4.56754700  | -3.61258200  |
| H | -11.24204200 | -7.25307400  | -10.55815000 | H | -7.39191900  | -8.22288000 | -6.75536400  |
| H | -11.08470100 | -8.55492400  | -9.41125800  | H | -6.14545600  | -9.39195700 | -6.34848700  |
| H | -6.87263700  | -10.81096600 | -8.28457500  | H | -4.05845100  | -7.32453400 | -8.37874600  |
| H | -8.19109900  | -10.62062900 | -7.15394100  | H | -4.32097500  | -7.77879400 | -6.73590400  |
| H | -8.17386100  | -9.72520600  | -8.66541100  | H | -8.92911400  | -7.83096300 | -8.66211700  |
| H | -8.37278700  | -4.77036900  | -3.64589800  | H | -8.85614100  | -7.88881000 | -10.40397300 |
| H | -9.59587300  | -4.56325000  | -4.87654400  | H | -10.29562000 | -4.43215500 | -9.00819900  |
| H | -7.92282200  | -4.70146000  | -5.33456700  | H | -6.74343000  | -6.50870700 | -9.86256700  |
| H | -3.68820800  | -1.65740900  | -14.03028300 | H | -6.16301300  | -3.99091900 | -9.65614900  |
| H | -3.89707800  | -2.11423400  | -15.67727300 | H | -13.73086100 | -1.07658000 | -11.40405900 |
| H | -5.55033800  | -0.30482900  | -13.12288000 | H | -14.64288900 | -1.74574900 | -10.06178400 |
| H | -5.95584500  | 1.08069000   | -14.11048800 | H | -13.29357000 | -0.68907300 | -8.06438500  |
| H | -4.66174400  | -0.36247100  | -17.10294500 | H | -10.76414600 | -2.58108400 | -10.86150300 |
| H | -6.68104500  | 1.56034700   | -16.33133500 | H | -10.98018400 | -0.83037300 | -7.05188800  |
| H | -6.67137100  | 0.51302100   | -17.78643100 | H | -5.16704200  | -5.45226500 | -5.86757900  |
| H | -8.52124000  | 4.02014000   | -15.49005800 | H | -4.93861900  | -5.18558100 | -4.14224400  |
| H | -8.94397500  | 4.56824600   | -17.13344400 | H | -3.76069700  | -3.45008600 | -6.38268300  |
| H | -5.10692200  | 4.79476400   | -15.82760600 | H | -5.23230800  | -3.04915800 | -5.46285000  |
| H | -6.30103500  | 3.71475900   | -15.03276700 | H | -2.68050900  | -3.71131600 | -4.23998700  |
| H | -7.40187900  | 5.81228000   | -18.33843700 | H | -1.00057000  | -2.49153500 | -5.25296400  |
| H | -5.25655200  | 5.81249700   | -19.32605400 | H | -2.17683800  | -2.09733700 | -6.52425600  |
| H | -4.56500100  | 5.02365600   | -17.90718900 | H | -1.32101000  | -0.77004800 | -5.68489500  |
| H | -0.01474800  | 2.01447400   | -5.67345100  | H | -4.26310900  | -0.95862200 | -5.89997000  |
| H | 1.98223500   | 2.07536900   | -6.82305100  | H | -4.66685800  | -0.74466300 | -4.16301200  |
| H | -1.84426500  | 1.06820100   | -8.54014000  | H | -3.40080300  | 0.27370200  | -4.94442100  |
| H | 3.04288000   | 1.82851600   | -9.03358400  | H | -1.72025600  | -0.36874000 | -3.32529400  |
| H | -0.77251800  | 0.80406000   | -10.75630200 | H | -3.03509200  | -1.25753900 | -2.47921400  |
| H | 2.60292100   | 0.24497200   | -11.37082900 | H | -1.51886800  | -2.10399600 | -2.91342800  |
| H | 2.50139500   | 1.98175300   | -11.67545600 | H | -9.12804200  | -2.37335200 | -3.70662000  |
| H | -8.14505500  | 2.66717100   | 1.89823500   | H | -7.43943200  | -2.51792100 | -4.15724800  |
| H | -9.58407000  | 1.74955600   | 1.52532100   | H | -11.94838000 | 0.91840100  | -3.75376200  |
| H | -6.96894500  | 0.52861600   | 1.77589700   | H | -13.40673900 | 1.65383300  | -4.40186200  |
| H | -8.83691800  | 2.17985300   | -1.73818200  | H | -11.85177900 | 3.56039800  | -5.30982300  |
| H | -7.61149300  | 0.55388500   | -3.14526200  | H | -10.52857700 | 2.43390800  | -5.03417100  |
| H | -5.71920500  | -1.06476700  | 0.37151500   | H | -11.15120300 | 1.64980800  | -8.43534700  |
| H | -5.59982600  | -1.97874300  | -1.81892400  | H | -10.05855500 | 2.29796500  | -7.29284800  |
| H | -7.79593800  | 4.55468100   | -6.91691400  | H | -9.11822500  | 2.03027700  | -11.82635000 |
| H | -5.80678700  | 5.50269600   | -8.05609700  | H | -7.36166000  | 1.82244600  | -11.69770300 |
| H | -7.61074700  | 3.55300900   | -4.64286700  | O | -6.45688500  | -0.86323800 | -11.65149500 |
| H | -3.58161200  | 5.49300100   | -6.95200100  | H | -5.02345500  | 6.74015500  | -17.84875400 |
| H | -3.24451700  | 3.48376400   | -2.18258200  | H | -7.30296300  | -0.08972200 | -16.24655400 |



|                                    |             |             |              |   |             |             |             |
|------------------------------------|-------------|-------------|--------------|---|-------------|-------------|-------------|
| H                                  | -1.80102500 | 5.92621700  | -4.51149000  | C | -4.04867400 | -3.00869900 | 2.21165000  |
| H                                  | 1.21891500  | 0.91523700  | -12.20588500 | C | -3.79511600 | -2.61369900 | 0.75586200  |
| H                                  | 1.54837100  | -2.64353700 | -7.31925500  | C | -2.34849800 | -2.73711500 | 0.24635500  |
| H                                  | 0.59891500  | -1.91288100 | -8.61613900  | O | -1.42488700 | -2.36759800 | 1.09060500  |
| H                                  | 0.83928600  | -4.70003100 | -6.41566200  | O | -2.15122500 | -3.15078700 | -0.89052100 |
| H                                  | -0.86014300 | -5.01486000 | -6.29120400  | C | -3.83735700 | -5.63793500 | -5.67018800 |
| O                                  | -6.14979500 | -1.72508100 | -9.10237300  | C | -2.88629900 | -5.65855100 | -4.45555300 |
| H                                  | -6.11442200 | -1.48143900 | -10.06424600 | C | -1.64388300 | -4.77786300 | -4.62401000 |
| H                                  | -5.77029300 | -0.94005700 | -8.66017900  | C | -0.46211900 | -5.17465000 | -3.73691400 |
| O                                  | -5.66927800 | 0.85201200  | -8.20612000  | O | -0.34751900 | -6.28296300 | -3.22953900 |
| H                                  | -5.43282100 | 1.41404600  | -7.46392300  | N | 0.50965700  | -4.22276500 | -3.62355600 |
| H                                  | -6.64137000 | 0.78588200  | -8.16979200  | C | -2.29914800 | -2.93300800 | 8.73582800  |
|                                    |             |             |              | C | -2.72677400 | -1.94489900 | 7.64181400  |
|                                    |             |             |              | C | -1.64877000 | -0.89793600 | 7.34846900  |
|                                    |             |             |              | O | -0.44372400 | -1.17715600 | 7.45029300  |
|                                    |             |             |              | N | -2.05587100 | 0.31672900  | 6.95431200  |
|                                    |             |             |              | C | 3.15610100  | -7.78873900 | 1.98330900  |
|                                    |             |             |              | C | 2.74786100  | -7.46571300 | 0.53369500  |
|                                    |             |             |              | C | 1.86470700  | -6.25400200 | 0.41098400  |
|                                    |             |             |              | N | 0.78521900  | -6.15691200 | -0.45378100 |
|                                    |             |             |              | C | 1.92044800  | -5.03138700 | 1.03763000  |
|                                    |             |             |              | C | 0.23543600  | -4.93348700 | -0.32858200 |
|                                    |             |             |              | N | 0.90127500  | -4.23007200 | 0.57099400  |
|                                    |             |             |              | C | 8.70397800  | 0.14946200  | 0.85393100  |
|                                    |             |             |              | N | 8.13116100  | 1.34381200  | 1.49915600  |
|                                    |             |             |              | C | 6.79702700  | 1.56233100  | 1.59131700  |
|                                    |             |             |              | N | 5.96931000  | 1.12800800  | 0.66821300  |
|                                    |             |             |              | N | 6.33736100  | 2.27685800  | 2.64755800  |
|                                    |             |             |              | C | 11.33000000 | 2.36750900  | -3.57409700 |
|                                    |             |             |              | N | 10.96701100 | 0.95582300  | -3.54510500 |
|                                    |             |             |              | C | 9.73269600  | 0.46156800  | -3.28217900 |
|                                    |             |             |              | N | 8.70445300  | 1.27270400  | -3.04456400 |
|                                    |             |             |              | N | 9.53587700  | -0.85543600 | -3.22609400 |
|                                    |             |             |              | C | -7.09596600 | -2.57996700 | -6.77164900 |
|                                    |             |             |              | C | -7.94093500 | -2.15265000 | -5.55757200 |
|                                    |             |             |              | C | -7.28379700 | -1.50611900 | -4.35414600 |
|                                    |             |             |              | C | -5.91912800 | -1.62339800 | -4.05210200 |
|                                    |             |             |              | C | -8.09078700 | -0.80844700 | -3.43781100 |
|                                    |             |             |              | C | -5.37858400 | -1.08792900 | -2.87841800 |
|                                    |             |             |              | C | -7.56957900 | -0.26225100 | -2.26544800 |
|                                    |             |             |              | C | -6.20685400 | -0.40962600 | -1.97740700 |
|                                    |             |             |              | O | -5.63964000 | 0.10629700  | -0.84681200 |
|                                    |             |             |              | C | 3.60857300  | -1.34538700 | 0.60296900  |
|                                    |             |             |              | C | 4.94475800  | -1.50254900 | -1.58086200 |
| <b><sup>5</sup>TS<sub>1w</sub></b> |             |             |              |   |             |             |             |
| C                                  | -2.49004200 | 5.29545500  | -5.44093100  |   |             |             |             |
| C                                  | -2.61780000 | 3.81530600  | -5.22061600  |   |             |             |             |
| C                                  | -3.77052100 | 3.09466100  | -5.00324900  |   |             |             |             |
| C                                  | -1.54556200 | 2.84652700  | -5.25547200  |   |             |             |             |
| N                                  | -3.48320600 | 1.74748200  | -4.89886800  |   |             |             |             |
| C                                  | -2.12931000 | 1.56175800  | -5.05530000  |   |             |             |             |
| C                                  | -0.15137700 | 2.93978500  | -5.44549800  |   |             |             |             |
| C                                  | -1.36119800 | 0.38705600  | -5.04846000  |   |             |             |             |
| C                                  | 0.61278900  | 1.77647600  | -5.43817600  |   |             |             |             |
| C                                  | 0.01159000  | 0.51190900  | -5.24509100  |   |             |             |             |
| C                                  | -0.04415600 | 7.49597400  | 4.40220000   |   |             |             |             |
| C                                  | -0.81120100 | 6.73239300  | 3.31216700   |   |             |             |             |
| C                                  | -1.33207200 | 5.35685800  | 3.74261500   |   |             |             |             |
| O                                  | -0.73970500 | 4.32298100  | 3.44732700   |   |             |             |             |
| N                                  | -2.49700000 | 5.37461000  | 4.43654400   |   |             |             |             |
| C                                  | 3.14273300  | 8.45321700  | 0.45521000   |   |             |             |             |
| C                                  | 1.92135200  | 7.81808200  | -0.16517900  |   |             |             |             |
| C                                  | 1.75791100  | 6.42866200  | -0.27596900  |   |             |             |             |
| C                                  | 0.87700700  | 8.63269700  | -0.63440800  |   |             |             |             |
| C                                  | 0.59776300  | 5.86706700  | -0.81541800  |   |             |             |             |
| C                                  | -0.29032500 | 8.08963100  | -1.17064600  |   |             |             |             |
| C                                  | -0.43878000 | 6.69860500  | -1.25425200  |   |             |             |             |
| O                                  | -1.57578700 | 6.11337400  | -1.73505900  |   |             |             |             |
| C                                  | 0.22564300  | -5.64731300 | 6.11902400   |   |             |             |             |
| C                                  | 0.12759500  | -4.12896500 | 6.21457200   |   |             |             |             |
| C                                  | 0.41837400  | -3.34509700 | 4.96998800   |   |             |             |             |
| N                                  | 0.60348300  | -1.97877700 | 5.04388100   |   |             |             |             |
| C                                  | 0.44726900  | -3.64017200 | 3.62801600   |   |             |             |             |
| C                                  | 0.72254100  | -1.48925700 | 3.79958400   |   |             |             |             |
| N                                  | 0.64540600  | -2.47334000 | 2.91298500   |   |             |             |             |

|    |             |             |             |   |             |             |             |
|----|-------------|-------------|-------------|---|-------------|-------------|-------------|
| C  | 6.32990800  | -1.06794600 | -2.07361400 | H | 8.72325300  | 1.87347400  | 2.12426300  |
| O  | 2.72943200  | -2.21164100 | 0.83996000  | H | 8.61120000  | 0.19404700  | -0.23441100 |
| O  | 6.71002500  | 0.10609400  | -1.71062600 | H | 9.75815800  | 0.07561100  | 1.13751400  |
| O  | 7.01527000  | -1.82104700 | -2.78382600 | H | 8.56116200  | -1.25082900 | -3.09228600 |
| C  | -4.18373800 | 2.06974900  | 4.72838900  | H | 10.32052400 | -1.48994500 | -3.25539000 |
| N  | -4.37283500 | 2.29880900  | 1.72547000  | H | 8.75760800  | 2.25611200  | -3.25776200 |
| O  | -4.36938200 | 3.23487600  | 4.25411300  | H | 7.83961100  | 0.86266600  | -2.59207900 |
| C  | -3.94136800 | 0.94631600  | 3.68130800  | H | 11.64500400 | 0.30453200  | -3.91800100 |
| N  | -3.89315400 | 3.17374000  | 0.65701200  | H | 12.39372700 | 2.46359100  | -3.32703300 |
| O  | -4.19202700 | 1.74985800  | 5.92652400  | H | 10.76893300 | 2.92419000  | -2.81437000 |
| C  | -3.35435800 | 1.43897400  | 2.35310800  | H | -2.15608400 | 6.78893100  | -2.09785200 |
| C  | -5.12571600 | 3.79259000  | 0.07466400  | H | -1.08842600 | 8.75129100  | -1.51718000 |
| C  | -2.98026600 | 4.25817300  | 1.14909500  | H | 0.48348600  | 4.78607600  | -0.89384000 |
| C  | -3.20151100 | 2.36598200  | -0.40056400 | H | 0.96995900  | 9.71897000  | -0.57162100 |
| O  | 0.48832300  | -1.83170500 | -0.78545500 | H | 2.54835600  | 5.76097400  | 0.07295600  |
| Fe | 0.54814600  | -2.15285400 | 0.86748600  | H | 2.87304600  | 8.98532000  | 1.38095400  |
| C  | 4.90230200  | -1.84545400 | -0.06233600 | H | 3.57869500  | 9.20442000  | -0.22080600 |
| H  | 4.98913900  | -2.92877700 | 0.07885900  | H | -8.72613300 | -1.46861400 | -5.91780600 |
| H  | 5.74849000  | -1.38069000 | 0.45858300  | H | -8.48682800 | -3.04188000 | -5.19573000 |
| H  | -7.83476400 | -2.92774100 | -7.46375300 | H | -9.15832200 | -0.69420400 | -3.63827500 |
| H  | -6.55851100 | -1.76281900 | -7.20514500 | H | -5.25750300 | -2.16516900 | -4.72771800 |
| H  | -6.40417400 | -3.39900200 | -6.54869300 | H | -4.32583100 | -1.22624300 | -2.63607500 |
| H  | -3.22657700 | -5.74848700 | -6.54200100 | H | -8.22423000 | 0.27354100  | -1.57378500 |
| H  | -4.48817400 | -6.48242600 | -5.58149200 | H | -6.30847800 | 0.29458500  | -0.18178900 |
| H  | -4.41977900 | -4.71493400 | -5.75042600 | H | 0.63568800  | -0.38364000 | -5.25688200 |
| H  | -0.06857200 | 8.54534800  | 4.19417000  | H | 1.69135400  | 1.83720700  | -5.59478000 |
| H  | 0.97215500  | 7.17493800  | 4.49714500  | H | -1.82413100 | -0.58791600 | -4.89871200 |
| H  | -0.52080400 | 7.36490900  | 5.38505100  | H | 0.32337800  | 3.90939300  | -5.60350400 |
| H  | 2.31653100  | -8.13279300 | 2.55051000  | H | -4.79769000 | 3.44311500  | -4.92587000 |
| H  | 3.58560800  | -6.93489100 | 2.46444100  | H | -4.16315200 | 1.01909700  | -4.73824900 |
| H  | 3.90986300  | -8.58829900 | 1.98911800  | H | -1.74861100 | 5.73925300  | -4.76369300 |
| H  | -0.34209100 | -6.02948700 | 5.29639300  | H | -3.44839600 | 5.80784400  | -5.28097400 |
| H  | 1.23792000  | -5.98532300 | 6.04106500  | H | -2.92748700 | -2.46675100 | 6.69053100  |
| H  | -0.18900400 | -6.09405000 | 7.03307900  | H | -3.66762500 | -1.44409300 | 7.91144200  |
| H  | -2.08541800 | -2.37335700 | 9.62279200  | H | -1.33017800 | 0.99073500  | 6.74126100  |
| H  | -3.05114400 | -3.66379700 | 8.94829100  | H | -3.01554800 | 0.62615600  | 6.72404600  |
| H  | -1.37663900 | -3.45412600 | 8.46479700  | H | -0.89140300 | -3.86031100 | 6.52183200  |
| H  | -5.07791900 | -2.88763000 | 2.47877300  | H | 0.77775300  | -3.75926600 | 7.02003900  |
| H  | -3.75519300 | -4.02452800 | 2.37362600  | H | 0.31477900  | -4.59537000 | 3.13719000  |
| H  | -3.45138400 | -2.38985100 | 2.89113500  | H | 0.46864300  | -1.45165000 | 5.92236100  |
| H  | 5.35595300  | 2.51920200  | 2.68392600  | H | 0.82957500  | -0.43988700 | 3.55128500  |
| H  | 6.84058900  | 2.28603400  | 3.52380400  | H | 3.65327700  | -7.31176900 | -0.07730800 |
| H  | 4.96909800  | 0.89417700  | 0.85401300  | H | 2.23467200  | -8.33222200 | 0.09065900  |
| H  | 6.30992900  | 0.75476000  | -0.25296800 | H | 0.49520100  | -6.80486700 | -1.18276000 |

|                                       |             |             |             |   |              |              |              |
|---------------------------------------|-------------|-------------|-------------|---|--------------|--------------|--------------|
| H                                     | 2.63068700  | -4.67010600 | 1.77070300  | C | -3.22648200  | 4.36470300   | -4.32309600  |
| H                                     | -0.62864000 | -4.56469000 | -0.87848600 | C | -3.81798400  | 3.75706400   | -3.23857900  |
| H                                     | -3.26326700 | 0.19904600  | 4.10900700  | C | -4.26635700  | 4.49924300   | -5.31813300  |
| H                                     | -4.89936200 | 0.43307700  | 3.50106500  | N | -5.15107500  | 3.50383400   | -3.49730200  |
| H                                     | -2.41456000 | 1.97481900  | 2.56770700  | C | -5.45837600  | 3.95174400   | -4.76094600  |
| H                                     | -3.11990100 | 0.58757400  | 1.70548800  | C | -4.30890300  | 5.04190200   | -6.61913300  |
| H                                     | -4.63421300 | 2.93079500  | 2.51460400  | C | -6.67274700  | 3.93997000   | -5.46422700  |
| H                                     | -3.51865800 | 4.84790800  | 1.89552100  | C | -5.51222900  | 5.03256500   | -7.31826700  |
| H                                     | -2.10051800 | 3.81290100  | 1.61915400  | C | -6.68346600  | 4.48833400   | -6.74382400  |
| H                                     | -2.67451200 | 4.87927600  | 0.30308300  | C | 1.83201400   | -3.59049800  | -9.24293100  |
| H                                     | -2.26540400 | 1.96982000  | -0.00521600 | C | 0.95053100   | -2.85597500  | -8.22130400  |
| H                                     | -3.86606400 | 1.54972100  | -0.69292600 | C | -0.30610300  | -3.61886700  | -7.78793000  |
| H                                     | -2.98589800 | 3.01982300  | -1.24932000 | O | -1.41306900  | -3.35178700  | -8.24694700  |
| H                                     | -4.83642700 | 4.49696200  | -0.71187400 | N | -0.10226800  | -4.57284600  | -6.84595300  |
| H                                     | -5.74969400 | 2.99522100  | -0.33233700 | C | 1.90589900   | 1.09646900   | -11.40583900 |
| H                                     | -5.66243100 | 4.31675100  | 0.87151300  | C | 1.24991300   | 1.29684600   | -10.06048500 |
| H                                     | -4.40770600 | -3.22096000 | 0.07676600  | C | -0.11523900  | 1.05689800   | -9.83971600  |
| H                                     | -4.09690000 | -1.57194900 | 0.58422300  | C | 2.02111700   | 1.70783900   | -8.96033600  |
| H                                     | -3.41363400 | -5.37913700 | -3.53103300 | C | -0.69186800  | 1.20266000   | -8.57556000  |
| H                                     | -2.53841800 | -6.69027500 | -4.30368500 | C | 1.46342200   | 1.85345300   | -7.69002600  |
| H                                     | -1.26532000 | -4.85241800 | -5.65872900 | C | 0.10145900   | 1.59095100   | -7.48997700  |
| H                                     | -1.87953800 | -3.71543800 | -4.46470300 | O | -0.48649100  | 1.68198000   | -6.26034000  |
| H                                     | 1.26680000  | -4.39689100 | -2.97565300 | C | -10.82985900 | -7.50374900  | -9.60298300  |
| H                                     | 0.29209800  | -3.25125200 | -3.79068200 | C | -9.31412800  | -7.35645200  | -9.56847700  |
| H                                     | 4.60511900  | -2.36348400 | -2.16846900 | C | -8.77473000  | -5.95960100  | -9.57214600  |
| H                                     | 4.26433600  | -0.66431300 | -1.78890800 | N | -7.43041700  | -5.73149300  | -9.79066300  |
| O                                     | 3.49238900  | -0.11108300 | 0.84294400  | C | -9.31081300  | -4.72782800  | -9.28585300  |
| H                                     | 11.16612200 | 2.79342700  | -4.54188600 | C | -7.18216400  | -4.42340400  | -9.62878500  |
| H                                     | 8.16847300  | -0.70091400 | 1.22129200  | N | -8.30545000  | -3.78122400  | -9.33368200  |
| H                                     | -2.17549600 | 5.49864500  | -6.44317600 | C | -8.60413100  | -4.29641000  | -4.57714900  |
| H                                     | 3.92187300  | 7.76438600  | 0.70685500  | C | -8.47039200  | -2.77496300  | -4.48420900  |
| H                                     | -1.66662700 | 7.34216500  | 2.98120300  | C | -8.79008200  | -1.97172200  | -5.75662400  |
| H                                     | -0.17304700 | 6.57549200  | 2.43597100  | O | -8.35427000  | -2.48117000  | -6.87482100  |
| H                                     | -2.96743900 | 6.24953300  | 4.61710200  | O | -9.40620900  | -0.91550000  | -5.65323000  |
| H                                     | -3.05372000 | 4.51898700  | 4.58909600  | C | -12.51901800 | 2.82125300   | -2.81805300  |
| O                                     | 0.72285200  | -0.20578400 | 1.25163200  | C | -12.40664800 | 1.87969800   | -4.03647100  |
| H                                     | 1.69259200  | -0.03560000 | 1.24022600  | C | -11.67124300 | 2.49796100   | -5.22956800  |
| H                                     | 0.27800900  | 0.34506100  | 0.18693600  | C | -11.97650000 | 1.83802900   | -6.57551100  |
| O                                     | -0.11010500 | 0.48651600  | -0.88481100 | O | -12.97051500 | 1.15052900   | -6.77495400  |
| H                                     | 0.55332700  | 0.96526200  | -1.39262000 | N | -11.09845300 | 2.14741800   | -7.57242800  |
| H                                     | 0.12993800  | -0.73603900 | -1.00022700 | C | -7.55704100  | -10.11229400 | -7.84978400  |
|                                       |             |             |             | C | -6.74171900  | -8.99300300  | -7.18746700  |
|                                       |             |             |             | C | -5.83585000  | -8.25947400  | -8.17966200  |
| <b><sup>5</sup>INT<sub>12w1</sub></b> |             |             |             | O | -6.17103500  | -8.11832900  | -9.36685400  |
| C                                     | -1.81312500 | 4.85855900  | -4.44308400 |   |              |              |              |

|   |              |             |              |    |              |              |              |
|---|--------------|-------------|--------------|----|--------------|--------------|--------------|
| N | -4.68641600  | -7.75475500 | -7.71145600  | Fe | -8.30769900  | -1.79689900  | -8.77375600  |
| C | -13.81908500 | -3.24653400 | -11.39713800 | C  | -8.49438600  | 0.21259400   | -12.78933400 |
| C | -13.70848500 | -1.90296700 | -10.64995900 | H  | -9.53655500  | -0.10646900  | -12.90537100 |
| C | -12.47328100 | -1.78344200 | -9.79810900  | H  | -7.98429200  | 0.00364700   | -13.73790100 |
| N | -12.43617200 | -1.17875300 | -8.54918700  | H  | -9.88864700  | 4.08493200   | 1.42769000   |
| C | -11.17550600 | -2.16488800 | -10.04010200 | H  | -8.78346000  | 4.34234500   | 0.09913400   |
| C | -11.17430900 | -1.21289500 | -8.08358100  | H  | -10.29252700 | 3.45614200   | -0.16982100  |
| N | -10.38810300 | -1.80792800 | -8.96597900  | H  | -12.81325400 | 3.77758400   | -3.19764700  |
| C | -6.56286900  | 0.53748300  | -16.69791600 | H  | -13.29210600 | 2.43458500   | -2.18764600  |
| N | -5.24215800  | 0.02837200  | -16.28887500 | H  | -11.58380300 | 2.92344000   | -2.25928900  |
| C | -4.94065500  | -0.30325200 | -15.00983300 | H  | 2.83131600   | -3.21089500  | -9.19428400  |
| N | -5.49614200  | 0.31634200  | -13.99413400 | H  | 1.46512700   | -3.50121900  | -10.24412600 |
| N | -4.01429200  | -1.27213700 | -14.80396100 | H  | 1.89678200   | -4.66423100  | -9.01276500  |
| C | -5.29190200  | 5.77748300  | -18.23095100 | H  | -14.00770300 | -4.04580300  | -10.71115400 |
| N | -6.66067800  | 5.42691800  | -17.87350000 | H  | -12.92706900 | -3.45466000  | -11.95037500 |
| C | -7.04300900  | 4.82125500  | -16.72270100 | H  | -14.65512500 | -3.21222300  | -12.10908000 |
| N | -6.15204800  | 4.50049200  | -15.78762000 | H  | -11.30567500 | -6.91754100  | -8.84460100  |
| N | -8.32313600  | 4.50999800  | -16.52137500 | H  | -11.24203300 | -7.25300600  | -10.55813700 |
| C | -9.47970100  | 3.65737600  | 0.53565100   | H  | -11.09374800 | -8.55297600  | -9.41129700  |
| C | -8.80231300  | 2.37926100  | 1.06345100   | H  | -6.87263800  | -10.81095900 | -8.28458800  |
| C | -8.00937100  | 1.48232400  | 0.13386300   | H  | -8.19109700  | -10.62062800 | -7.15393800  |
| C | -8.14073200  | 1.48778000  | -1.26265100  | H  | -8.17528500  | -9.72842100  | -8.66588600  |
| C | -7.14091100  | 0.53046300  | 0.69717500   | H  | -8.37287000  | -4.77039400  | -3.64589000  |
| C | -7.45279600  | 0.57407800  | -2.06805700  | H  | -9.59589500  | -4.56326100  | -4.87646200  |
| C | -6.44286900  | -0.38522800 | -0.08875800  | H  | -7.92178800  | -4.69942500  | -5.33490400  |
| C | -6.60541400  | -0.37166300 | -1.47993500  | H  | -3.71987100  | -1.47271100  | -13.85722100 |
| O | -5.94792000  | -1.24361100 | -2.29936400  | H  | -3.86963100  | -2.00135400  | -15.48837500 |
| C | -7.82346100  | -0.63966200 | -11.69869400 | H  | -5.63594700  | -0.12167600  | -13.05715900 |
| C | -8.43629600  | 1.73398300  | -12.46680800 | H  | -6.05619100  | 1.19827600   | -14.11647300 |
| C | -8.16760100  | 2.61160400  | -13.69370800 | H  | -4.63348000  | -0.33726500  | -17.00838800 |
| O | -8.58387500  | -1.28418900 | -10.93754700 | H  | -6.71692500  | 1.57091400   | -16.37663000 |
| O | -6.97738400  | 2.54731300  | -14.17850100 | H  | -6.63580400  | 0.46875900   | -17.78755500 |
| O | -9.05864100  | 3.33756000  | -14.16277400 | H  | -8.63725100  | 4.09048900   | -15.59957000 |
| C | -3.16939200  | -5.83671100 | -5.15609800  | H  | -8.99516000  | 4.60709100   | -17.26837600 |
| N | -3.36942600  | -2.98053400 | -4.21993600  | H  | -5.21253600  | 4.86307700   | -15.81959400 |
| O | -2.07286600  | -5.24410000 | -4.90630500  | H  | -6.43529200  | 3.79041900   | -15.05466800 |
| C | -4.44599400  | -4.95005000 | -5.10781600  | H  | -7.39559000  | 5.83200400   | -18.43819100 |
| N | -2.70819900  | -1.69219100 | -4.41388300  | H  | -5.20725700  | 5.80014900   | -19.32374800 |
| O | -3.31625000  | -7.04049000 | -5.41686900  | H  | -4.59173700  | 5.01573200   | -17.86857300 |
| C | -4.19100600  | -3.45702500 | -5.34577200  | H  | 0.13844500   | 2.05645800   | -5.63282800  |
| C | -2.07703900  | -1.37624900 | -3.09355300  | H  | 2.09312500   | 2.16547300   | -6.85271300  |
| C | -1.64684400  | -1.72624300 | -5.47403800  | H  | -1.75280200  | 1.00896000   | -8.41935700  |
| C | -3.72271400  | -0.63594800 | -4.73816400  | H  | 3.08589500   | 1.91090300   | -9.09259500  |
| O | -8.38035300  | -0.07398500 | -8.36606600  | H  | -0.74951700  | 0.73909800   | -10.66984600 |



|   |             |             |             |    |             |             |             |
|---|-------------|-------------|-------------|----|-------------|-------------|-------------|
| C | 1.81808600  | 7.83474600  | -0.08738400 | C  | 9.80374000  | 0.66395000  | -3.19625600 |
| C | 1.58897600  | 6.45180700  | -0.00555300 | N  | 8.74934700  | 1.44566400  | -2.97732500 |
| C | 0.86635000  | 8.60892300  | -0.77082800 | N  | 9.63707600  | -0.65822300 | -3.16997300 |
| C | 0.45160600  | 5.86096100  | -0.56000200 | C  | -6.93216400 | -2.64620800 | -6.90112200 |
| C | -0.27907800 | 8.03691100  | -1.32610200 | C  | -7.82196900 | -2.24710100 | -5.70807300 |
| C | -0.49819500 | 6.65770800  | -1.21045900 | C  | -7.22962800 | -1.61713600 | -4.46288400 |
| O | -1.62095200 | 6.05319400  | -1.69845900 | C  | -5.87370400 | -1.68876400 | -4.11161800 |
| C | 0.28442100  | -5.71519200 | 6.04814800  | C  | -8.09865700 | -0.98415000 | -3.55627900 |
| C | 0.14999600  | -4.20463200 | 6.18328100  | C  | -5.40000800 | -1.17129200 | -2.90101300 |
| C | 0.46328800  | -3.39435200 | 4.96517600  | C  | -7.64580300 | -0.45881000 | -2.34694000 |
| N | 0.64530300  | -2.02848400 | 5.05787200  | C  | -6.29000100 | -0.56037000 | -2.00976400 |
| C | 0.51946200  | -3.67900200 | 3.62374800  | O  | -5.79125900 | -0.06804500 | -0.83854900 |
| C | 0.78923400  | -1.52649500 | 3.82296800  | C  | 3.68170500  | -1.32794700 | 0.57416600  |
| N | 0.73084600  | -2.50492600 | 2.92700400  | C  | 5.04421300  | -1.42274400 | -1.59974000 |
| C | -3.99015200 | -3.11539400 | 2.11519700  | C  | 6.42661700  | -0.96010700 | -2.07094600 |
| C | -3.72318400 | -2.70039100 | 0.66690400  | O  | 2.84991800  | -2.23114700 | 0.84717000  |
| C | -2.26628200 | -2.66338000 | 0.17401200  | O  | 6.79230900  | 0.20614800  | -1.66849000 |
| O | -1.34993100 | -2.41758000 | 1.06468400  | O  | 7.12519400  | -1.68172000 | -2.80046100 |
| O | -2.04518200 | -2.83178500 | -1.02451000 | C  | -4.29241600 | 1.94061900  | 4.72342000  |
| C | -3.62974100 | -5.65370000 | -5.79117800 | N  | -4.60196900 | 2.30275600  | 1.75033500  |
| C | -2.69958700 | -5.67789500 | -4.55966400 | O  | -4.47927200 | 3.12819700  | 4.31233900  |
| C | -1.45247300 | -4.79980000 | -4.70004000 | C  | -4.09253400 | 0.86222900  | 3.62047900  |
| C | -0.29961000 | -5.18640100 | -3.77162900 | N  | -4.17153900 | 3.21695600  | 0.69555100  |
| O | -0.24008400 | -6.26122600 | -3.18606700 | O  | -4.27071500 | 1.56385200  | 5.90556300  |
| N | 0.70575500  | -4.26869600 | -3.70159400 | C  | -3.56373500 | 1.40722400  | 2.28813400  |
| C | -2.32434400 | -3.07807800 | 8.66153800  | C  | -5.42499300 | 3.89615300  | 0.23900100  |
| C | -2.74986800 | -2.08688100 | 7.57033200  | C  | -3.19463200 | 4.25068300  | 1.17363400  |
| C | -1.68223800 | -1.02275100 | 7.30093000  | C  | -3.58159100 | 2.44809900  | -0.45037100 |
| O | -0.47445700 | -1.28385500 | 7.42806600  | O  | 0.66257600  | -1.90819300 | -0.85811800 |
| N | -2.10028300 | 0.18370000  | 6.89755400  | Fe | 0.65509000  | -2.14389000 | 0.90622500  |
| C | 3.30674600  | -7.75531400 | 1.92749600  | C  | 4.99367900  | -1.78224000 | -0.08672900 |
| C | 2.88166400  | -7.40379900 | 0.48671500  | H  | 5.11068900  | -2.86376300 | 0.04684200  |
| C | 1.97436000  | -6.20456300 | 0.39834900  | H  | 5.82060800  | -1.29867200 | 0.44817100  |
| N | 0.89956100  | -6.09451300 | -0.47258800 | H  | -7.65546700 | -3.00024500 | -7.60628400 |
| C | 2.01083700  | -5.00001600 | 1.06010600  | H  | -6.40501000 | -1.81429200 | -7.31895900 |
| C | 0.33621700  | -4.88147500 | -0.31939800 | H  | -6.23031300 | -3.45346800 | -6.66812600 |
| N | 0.98690400  | -4.19714600 | 0.60593000  | H  | -3.00619800 | -5.74336500 | -6.65608200 |
| C | 8.71596600  | 0.29837900  | 0.95403800  | H  | -4.26567800 | -6.51121500 | -5.71959000 |
| N | 8.09119100  | 1.47873600  | 1.57618800  | H  | -4.22649600 | -4.73967900 | -5.86710200 |
| C | 6.75033300  | 1.66912400  | 1.62405100  | H  | -0.25637700 | 8.48951800  | 4.27190400  |
| N | 5.96088800  | 1.21260800  | 0.67875800  | H  | 0.80641700  | 7.13582300  | 4.57342200  |
| N | 6.24302900  | 2.38033300  | 2.66077600  | H  | -0.69981000 | 7.28821900  | 5.44486900  |
| C | 11.35447300 | 2.61413100  | -3.41615400 | H  | 2.46692200  | -8.12147500 | 2.48026500  |
| N | 11.03301400 | 1.19248500  | -3.41226400 | H  | 3.71392200  | -6.89889200 | 2.42321700  |

|   |             |             |             |   |             |             |             |
|---|-------------|-------------|-------------|---|-------------|-------------|-------------|
| H | 4.07448100  | -8.54034400 | 1.91451300  | H | -1.76722500 | 5.75042100  | -4.73934900 |
| H | -0.26560800 | -6.09912200 | 5.21442400  | H | -3.46271100 | 5.79640600  | -5.27436700 |
| H | 1.30382500  | -6.03317400 | 5.97961200  | H | -2.93035200 | -2.60261100 | 6.61162500  |
| H | -0.13108400 | -6.19218100 | 6.94689500  | H | -3.70094200 | -1.60046900 | 7.82997300  |
| H | -2.13246800 | -2.52421700 | 9.55712300  | H | -1.38233600 | 0.87162300  | 6.70370900  |
| H | -3.06487200 | -3.82524900 | 8.85660200  | H | -3.06359200 | 0.48070400  | 6.66029700  |
| H | -1.38888400 | -3.58103100 | 8.40109600  | H | -0.88363200 | -3.96536100 | 6.46441300  |
| H | -5.02479400 | -3.01687400 | 2.37044000  | H | 0.76818700  | -3.84211900 | 7.01638400  |
| H | -3.67939300 | -4.12724600 | 2.26998500  | H | 0.39444800  | -4.62972300 | 3.12349400  |
| H | -3.41509800 | -2.49138100 | 2.80924800  | H | 0.48092300  | -1.51216400 | 5.93994300  |
| H | 5.25690500  | 2.60550700  | 2.66340600  | H | 0.90418700  | -0.47583900 | 3.58345300  |
| H | 6.71793700  | 2.40572400  | 3.55233900  | H | 3.77843600  | -7.21601100 | -0.12759500 |
| H | 4.96004800  | 0.96700100  | 0.83442700  | H | 2.38093900  | -8.26824300 | 0.02572600  |
| H | 6.33439000  | 0.84231600  | -0.23232100 | H | 0.62020200  | -6.71816500 | -1.22890600 |
| H | 8.65094300  | 2.02801400  | 2.21398800  | H | 2.71495500  | -4.64895900 | 1.80359500  |
| H | 8.65938600  | 0.33806800  | -0.13705500 | H | -0.51292300 | -4.50954900 | -0.88701100 |
| H | 9.76148400  | 0.25344000  | 1.27374500  | H | -3.39562300 | 0.10187100  | 3.99145100  |
| H | 8.66885300  | -1.07708500 | -3.06604900 | H | -5.05655800 | 0.35276700  | 3.46217700  |
| H | 10.43727600 | -1.27347600 | -3.18356600 | H | -2.60885900 | 1.92420300  | 2.47946000  |
| H | 8.78829300  | 2.43576400  | -3.16009000 | H | -3.36990500 | 0.58666300  | 1.58973700  |
| H | 7.89165000  | 1.00841700  | -2.53641400 | H | -4.81791100 | 2.90293400  | 2.57645700  |
| H | 11.73656700 | 0.56620300  | -3.78073000 | H | -3.66139200 | 4.81648700  | 1.98412600  |
| H | 12.41085600 | 2.73718200  | -3.15041700 | H | -2.29882900 | 3.75786200  | 1.55642600  |
| H | 10.76607800 | 3.14461000  | -2.65845600 | H | -2.92598400 | 4.90325200  | 0.33911300  |
| H | -2.14694100 | 6.69586800  | -2.18268500 | H | -2.61142200 | 2.02643800  | -0.17279000 |
| H | -1.00546900 | 8.66841700  | -1.84419600 | H | -4.27592400 | 1.64750600  | -0.71501600 |
| H | 0.28598000  | 4.78699100  | -0.47985400 | H | -3.43916500 | 3.13845500  | -1.28567800 |
| H | 1.01316700  | 9.68674000  | -0.86694800 | H | -5.17659700 | 4.62438200  | -0.53989500 |
| H | 2.30658100  | 5.81437300  | 0.51505400  | H | -6.10772100 | 3.13558200  | -0.14575800 |
| H | 2.69400200  | 8.99939400  | 1.50558300  | H | -5.88142400 | 4.40250300  | 1.09530100  |
| H | 3.43173200  | 9.27757100  | -0.07381700 | H | -4.26046000 | -3.35636000 | -0.03164500 |
| H | -8.60073300 | -1.56556900 | -6.08716000 | H | -4.11959200 | -1.69347500 | 0.47803400  |
| H | -8.37230100 | -3.14895000 | -5.38612800 | H | -3.24506700 | -5.40016900 | -3.64493400 |
| H | -9.16200800 | -0.90701500 | -3.79370000 | H | -2.35761800 | -6.71066900 | -4.40193800 |
| H | -5.16434000 | -2.17759300 | -4.77979800 | H | -1.04522900 | -4.88033500 | -5.72320200 |
| H | -4.35180200 | -1.27223900 | -2.62355200 | H | -1.69130900 | -3.73593200 | -4.55297000 |
| H | -8.34936200 | 0.02222300  | -1.66274400 | H | 1.45295600  | -4.42212500 | -3.03777400 |
| H | -6.50205800 | 0.12890500  | -0.22128900 | H | 0.55300400  | -3.31237500 | -3.98572300 |
| H | 0.73608400  | -0.31470600 | -5.12913700 | H | 4.72488000  | -2.28247200 | -2.20041900 |
| H | 1.75336100  | 1.92060400  | -5.47659400 | H | 4.35090900  | -0.59430600 | -1.80410800 |
| H | -1.72885700 | -0.56469200 | -4.82310100 | O | 3.50351400  | -0.09599600 | 0.78163500  |
| H | 0.34650100  | 3.96464900  | -5.54136200 | H | 11.19470000 | 3.04742900  | -4.38134800 |
| H | -4.77749800 | 3.40642100  | -4.95613100 | H | 8.19219200  | -0.56595400 | 1.30539500  |
| H | -4.10024100 | 0.99755300  | -4.73334600 | H | -2.17097700 | 5.52004000  | -6.42339200 |

|   |             |             |             |   |              |              |              |
|---|-------------|-------------|-------------|---|--------------|--------------|--------------|
| H | 3.79173900  | 7.82256200  | 0.82743300  | C | -8.46143100  | -2.77847800  | -4.44639200  |
| H | -1.82202300 | 7.26874400  | 3.03357100  | C | -8.39213300  | -1.96881800  | -5.74662400  |
| H | -0.30759100 | 6.54628100  | 2.48674300  | O | -8.61959300  | -2.58086300  | -6.83918500  |
| H | -3.07462400 | 6.13098100  | 4.69925900  | O | -8.12088000  | -0.74917100  | -5.65651300  |
| H | -3.14286000 | 4.40207500  | 4.63057400  | C | -12.51898200 | 2.82128500   | -2.81801700  |
| O | 0.76761000  | -0.35006000 | 1.26673900  | C | -12.40163800 | 1.87416300   | -4.02929300  |
| H | 1.71253900  | -0.09309100 | 1.11810200  | C | -11.69135200 | 2.49498700   | -5.23548500  |
| H | -0.23344400 | 0.52714100  | 0.02138500  | C | -11.98602100 | 1.79161000   | -6.56125300  |
| O | -0.74068200 | 0.79945100  | -0.76991900 | O | -12.87805500 | 0.96210700   | -6.69255700  |
| H | -0.08251100 | 1.18525500  | -1.35485000 | N | -11.21456400 | 2.19583300   | -7.60716200  |
| H | -0.13470000 | -1.40214900 | -1.10545700 | C | -7.55700800  | -10.11238300 | -7.84976700  |
|   |             |             |             | C | -6.75262500  | -8.98855300  | -7.18519100  |
|   |             |             |             | C | -5.83574100  | -8.24696000  | -8.16249300  |
|   |             |             |             | O | -6.15433600  | -8.09937200  | -9.35524000  |
|   |             |             |             | N | -4.69685500  | -7.75399000  | -7.66182300  |
|   |             |             |             | C | -13.81888400 | -3.24655900  | -11.39705200 |
|   |             |             |             | C | -13.68921100 | -1.90053700  | -10.66019400 |
|   |             |             |             | C | -12.44769400 | -1.79283300  | -9.81618500  |
|   |             |             |             | N | -12.42706700 | -1.27447600  | -8.53250800  |
|   |             |             |             | C | -11.13649500 | -2.11836700  | -10.08104600 |
|   |             |             |             | C | -11.16267500 | -1.30408800  | -8.07255700  |
|   |             |             |             | N | -10.35734900 | -1.81175300  | -8.98708500  |
|   |             |             |             | C | -6.56288500  | 0.53748900   | -16.69796600 |
|   |             |             |             | N | -5.24109100  | 0.10375500   | -16.21975500 |
|   |             |             |             | C | -4.95206300  | -0.08454500  | -14.90943800 |
|   |             |             |             | N | -5.57840700  | 0.58686500   | -13.97286300 |
|   |             |             |             | N | -3.96589200  | -0.95941700  | -14.59068800 |
|   |             |             |             | C | -5.29195000  | 5.77749400   | -18.23092500 |
|   |             |             |             | N | -6.68596700  | 5.46184200   | -17.94511700 |
|   |             |             |             | C | -7.13999600  | 4.90177800   | -16.79773100 |
|   |             |             |             | N | -6.30781400  | 4.61445400   | -15.80042500 |
|   |             |             |             | N | -8.43235200  | 4.60486500   | -16.65843200 |
|   |             |             |             | C | -9.47984700  | 3.65726900   | 0.53561800   |
|   |             |             |             | C | -8.86096700  | 2.30706500   | 0.99197200   |
|   |             |             |             | C | -7.58186900  | 1.83233200   | 0.33443800   |
|   |             |             |             | C | -7.57379200  | 1.16021500   | -0.89999400  |
|   |             |             |             | C | -6.35011400  | 1.98666000   | 0.99035700   |
|   |             |             |             | C | -6.39892500  | 0.63481300   | -1.44242700  |
|   |             |             |             | C | -5.16498700  | 1.46823400   | 0.46406500   |
|   |             |             |             | C | -5.18662700  | 0.76984900   | -0.74925900  |
|   |             |             |             | O | -4.06486300  | 0.21406800   | -1.29089900  |
|   |             |             |             | C | -7.80738100  | -0.28026800  | -11.57195700 |
|   |             |             |             | C | -8.69936700  | 1.95155700   | -12.52204200 |
|   |             |             |             | C | -8.42156800  | 2.75695700   | -13.79686600 |

**<sup>5</sup>INT<sub>12w2</sub>**

|   |              |             |              |
|---|--------------|-------------|--------------|
| C | -1.81314700  | 4.85859800  | -4.44321900  |
| C | -3.21548900  | 4.33504100  | -4.32498800  |
| C | -3.81260200  | 3.80663200  | -3.20346300  |
| C | -4.22446600  | 4.31043200  | -5.35971900  |
| N | -5.11975000  | 3.45553400  | -3.47285700  |
| C | -5.40203600  | 3.74578300  | -4.78670700  |
| C | -4.24863900  | 4.70471000  | -6.71311800  |
| C | -6.57845400  | 3.55907000  | -5.52843900  |
| C | -5.41651400  | 4.52964100  | -7.44931400  |
| C | -6.56930700  | 3.96091100  | -6.86182000  |
| C | 1.83205100   | -3.59051300 | -9.24294300  |
| C | 0.93369600   | -2.91096800 | -8.20470500  |
| C | -0.42297000  | -3.60189100 | -8.04464100  |
| O | -1.37311100  | -3.32901000 | -8.76762900  |
| N | -0.49947900  | -4.51530900 | -7.03980300  |
| C | 1.90578400   | 1.09637100  | -11.40571700 |
| C | 1.19309400   | 1.33336700  | -10.09562000 |
| C | -0.20059300  | 1.20749400  | -9.98004100  |
| C | 1.91203100   | 1.67025200  | -8.93752600  |
| C | -0.85872100  | 1.38987100  | -8.76312400  |
| C | 1.27282600   | 1.85102300  | -7.70977100  |
| C | -0.11766000  | 1.69929200  | -7.61667300  |
| O | -0.79204600  | 1.82206300  | -6.43705900  |
| C | -10.82993900 | -7.50372800 | -9.60298500  |
| C | -9.31341300  | -7.35635200 | -9.57597000  |
| C | -8.77219500  | -5.96066000 | -9.61992200  |
| N | -7.42939400  | -5.73996000 | -9.85882700  |
| C | -9.30176200  | -4.72206000 | -9.35339500  |
| C | -7.17750000  | -4.43012000 | -9.72460900  |
| N | -8.29479700  | -3.77660600 | -9.42628600  |
| C | -8.60410700  | -4.29648700 | -4.57715100  |



|    |              |              |              |   |              |             |              |
|----|--------------|--------------|--------------|---|--------------|-------------|--------------|
| O  | -8.45047600  | -1.05628500  | -10.82026400 | H | -6.76671000  | 1.58026300  | -16.43924000 |
| O  | -7.23552500  | 2.65057200   | -14.28373700 | H | -6.59141900  | 0.41454500  | -17.78498800 |
| O  | -9.29501300  | 3.48746500   | -14.28983800 | H | -8.79678700  | 4.20985800  | -15.74710900 |
| C  | -3.66417500  | -6.01282200  | -4.88570500  | H | -9.05667100  | 4.66032800  | -17.44979800 |
| N  | -3.01522900  | -3.11488600  | -4.38410000  | H | -5.36236900  | 4.96252700  | -15.79426600 |
| O  | -2.84804300  | -5.46266700  | -5.68903800  | H | -6.63107700  | 3.90160600  | -15.08761100 |
| C  | -4.03502200  | -5.17974700  | -3.62795300  | H | -7.38033900  | 5.85589000  | -18.56603200 |
| N  | -3.10064100  | -1.93292000  | -5.23554700  | H | -5.14793500  | 5.78165200  | -19.31760000 |
| O  | -4.19483900  | -7.12841300  | -5.00635300  | H | -4.63012500  | 5.00619800  | -17.81969000 |
| C  | -4.28893400  | -3.69739700  | -3.94439700  | H | -0.18472000  | 2.08487700  | -5.73989600  |
| C  | -1.68812700  | -1.44956800  | -5.34461600  | H | 1.85910900   | 2.10446500  | -6.82250500  |
| C  | -3.64728000  | -2.22116900  | -6.60997300  | H | -1.94104800  | 1.28613600  | -8.69314300  |
| C  | -3.92835400  | -0.87479100  | -4.57912400  | H | 2.99662700   | 1.78809900  | -8.98822000  |
| O  | -8.25007700  | -0.15903900  | -8.16881900  | H | -0.79388700  | 0.95143200  | -10.86046400 |
| Fe | -8.26085100  | -1.79564000  | -8.80271100  | H | 2.57779200   | 0.22685800  | -11.34056300 |
| C  | -8.60958400  | 0.40832200   | -12.69503100 | H | 2.52757600   | 1.95992700  | -11.68639700 |
| H  | -9.61454700  | -0.02611200  | -12.74339100 | H | -8.66090900  | 2.37333300  | 2.07104700   |
| H  | -8.10950100  | 0.16239000   | -13.64136200 | H | -9.62321700  | 1.51859100  | 0.89352800   |
| H  | -9.88854600  | 4.08502000   | 1.42769300   | H | -6.31156900  | 2.50309000  | 1.95169500   |
| H  | -8.78344300  | 4.34234900   | 0.09916700   | H | -8.51037600  | 1.01078700  | -1.44141000  |
| H  | -10.28952100 | 3.51083300   | -0.18743800  | H | -6.42525700  | 0.09574600  | -2.38750100  |
| H  | -12.81325300 | 3.77759100   | -3.19763100  | H | -4.22689500  | 1.59077200  | 1.01148300   |
| H  | -13.29211200 | 2.43457400   | -2.18766000  | H | -3.33239100  | 0.29706700  | -0.67297900  |
| H  | -11.58333800 | 2.92768000   | -2.25929400  | H | -7.46848200  | 3.83315000  | -7.46693300  |
| H  | 2.83131300   | -3.21088600  | -9.19428600  | H | -5.44619100  | 4.83423300  | -8.49709700  |
| H  | 1.46511500   | -3.50121600  | -10.24412100 | H | -7.46344700  | 3.11012400  | -5.07737700  |
| H  | 1.90894400   | -4.66866700  | -9.03182900  | H | -3.36436200  | 5.14111900  | -7.17949500  |
| H  | -14.00782900 | -4.04578000  | -10.71116200 | H | -3.39799500  | 3.65415100  | -2.21131200  |
| H  | -12.92712100 | -3.45468500  | -11.95044900 | H | -5.74897500  | 3.01858700  | -2.81460400  |
| H  | -14.65602300 | -3.20884600  | -12.10742600 | H | -1.31772900  | 4.46725600  | -5.34064300  |
| H  | -11.30564300 | -6.91753800  | -8.84458400  | H | -1.20843300  | 4.57644000  | -3.57020900  |
| H  | -11.24200000 | -7.25305200  | -10.55816300 | H | -7.42091200  | -8.22864700 | -6.74513000  |
| H  | -11.09261900 | -8.55304200  | -9.40994800  | H | -6.15968500  | -9.37595500 | -6.34540800  |
| H  | -6.87264200  | -10.81094300 | -8.28461900  | H | -4.11994100  | -7.20197600 | -8.28469000  |
| H  | -8.19112600  | -10.62057800 | -7.15392600  | H | -4.46673300  | -7.69006500 | -6.64984700  |
| H  | -8.17737100  | -9.73321300  | -8.66715000  | H | -8.92549200  | -7.81567900 | -8.65749300  |
| H  | -8.37288000  | -4.77034700  | -3.64586500  | H | -8.86399900  | -7.93208100 | -10.39742900 |
| H  | -9.59589500  | -4.56321100  | -4.87650800  | H | -10.31711200 | -4.45985100 | -9.08732800  |
| H  | -7.91272800  | -4.69312900  | -5.33093800  | H | -6.74543400  | -6.51674300 | -9.91333900  |
| H  | -3.69712500  | -1.05949400  | -13.62035500 | H | -6.20051400  | -3.96921900 | -9.81252000  |
| H  | -3.74638400  | -1.73343400  | -15.20198700 | H | -13.69234800 | -1.07872800 | -11.39542400 |
| H  | -5.67929700  | 0.26296700   | -12.98889500 | H | -14.57099200 | -1.73437200 | -10.02383000 |
| H  | -6.22061700  | 1.39467800   | -14.17365000 | H | -13.16875400 | -0.79291600 | -8.02944900  |
| H  | -4.60548900  | -0.30435000  | -16.89118900 | H | -10.70097100 | -2.53553300 | -10.98047100 |

|                                    |              |             |              |   |             |             |             |
|------------------------------------|--------------|-------------|--------------|---|-------------|-------------|-------------|
| H                                  | -10.87165600 | -0.94256600 | -7.09511800  | C | -4.10491200 | 4.39400300  | -3.65746600 |
| H                                  | -4.92947500  | -5.61090500 | -3.16313000  | C | -1.87401700 | 4.27889500  | -3.94920600 |
| H                                  | -3.21590100  | -5.25929600 | -2.89479600  | N | -3.79152600 | 3.08982300  | -3.98380700 |
| H                                  | -5.07615700  | -3.63914400 | -4.71407400  | C | -2.43269900 | 2.98602100  | -4.16877500 |
| H                                  | -4.65558900  | -3.17428600 | -3.04926000  | C | -0.48113200 | 4.45129800  | -4.08301600 |
| H                                  | -2.61284100  | -3.86035400 | -4.99266000  | C | -1.64038400 | 1.87866800  | -4.50904100 |
| H                                  | -2.98783300  | -2.92269800 | -7.12725600  | C | 0.30640400  | 3.35669700  | -4.42553700 |
| H                                  | -4.64741200  | -2.64506100 | -6.51344600  | C | -0.26921200 | 2.08351400  | -4.63661300 |
| H                                  | -3.70287400  | -1.28461900 | -7.16864200  | C | -0.59779600 | 5.55253900  | 6.73716700  |
| H                                  | -4.98134200  | -1.15368100 | -4.63373200  | C | -1.32051200 | 5.12897900  | 5.45298200  |
| H                                  | -3.61577300  | -0.77069000 | -3.53844100  | C | -1.44571700 | 3.61099100  | 5.29885900  |
| H                                  | -3.78080000  | 0.06530800  | -5.11746400  | O | -0.58032300 | 2.94895700  | 4.73677100  |
| H                                  | -1.64864800  | -0.56803700 | -5.98792100  | N | -2.58038900 | 3.06294900  | 5.80609900  |
| H                                  | -1.33625400  | -1.21494900 | -4.33669800  | C | 2.52284800  | 7.98035300  | 3.41777400  |
| H                                  | -1.08935000  | -2.26155500 | -5.76300500  | C | 1.43111900  | 7.45322600  | 2.51519300  |
| H                                  | -9.29414000  | -2.35415200 | -3.86169900  | C | 1.54617600  | 6.19921100  | 1.89307200  |
| H                                  | -7.56048500  | -2.51564100 | -3.87568700  | C | 0.25811600  | 8.18764700  | 2.27914100  |
| H                                  | -11.90537500 | 0.93169700  | -3.74987800  | C | 0.53536200  | 5.68127200  | 1.08333200  |
| H                                  | -13.41360400 | 1.59149200  | -4.35161800  | C | -0.76717600 | 7.68411200  | 1.47589200  |
| H                                  | -12.01737500 | 3.54100600  | -5.36994700  | C | -0.63610500 | 6.42040000  | 0.88313500  |
| H                                  | -10.60162000 | 2.54004500  | -5.08270200  | O | -1.61884100 | 5.85748400  | 0.12473800  |
| H                                  | -11.31063100 | 1.73158500  | -8.50009100  | C | 0.56240800  | -7.35842200 | 3.95727500  |
| H                                  | -10.39550500 | 2.76904800  | -7.47118000  | C | 0.36709400  | -5.97850500 | 4.57112400  |
| H                                  | -9.68428100  | 2.23456900  | -12.13203400 | C | 0.66327700  | -4.80581000 | 3.68957800  |
| H                                  | -7.94413400  | 2.28152600  | -11.79302700 | N | 0.74939800  | -3.53509300 | 4.22352000  |
| O                                  | -6.57839000  | -0.01430300 | -11.49281100 | C | 0.77925800  | -4.63798600 | 2.33177800  |
| H                                  | -5.02341300  | 6.74016800  | -17.84881700 | C | 0.89269400  | -2.65688800 | 3.22091500  |
| H                                  | -7.30296300  | -0.08970600 | -16.24653200 | N | 0.92588500  | -3.29143100 | 2.05417000  |
| H                                  | -1.80098700  | 5.92622700  | -4.51132800  | C | -3.87531500 | -3.83776100 | 1.05701100  |
| H                                  | 1.21897300   | 0.91536400  | -12.20596300 | C | -3.67832200 | -2.96024700 | -0.17956700 |
| H                                  | 1.45809100   | -2.88271700 | -7.23692200  | C | -2.24271900 | -2.55089200 | -0.54374700 |
| H                                  | 0.73284000   | -1.87361000 | -8.49543500  | O | -1.31279000 | -2.86070900 | 0.27323300  |
| H                                  | 0.30872100   | -4.74155600 | -6.47908600  | O | -2.07865800 | -1.92444300 | -1.61111100 |
| H                                  | -1.36901500  | -5.01387600 | -6.81554400  | C | -3.47296000 | -3.64750800 | -7.24265100 |
| O                                  | -6.49518100  | -1.97293900 | -8.76281100  | C | -2.53887900 | -4.02363400 | -6.07545300 |
| H                                  | -6.03754800  | -1.09532500 | -8.75812000  | C | -1.36342700 | -3.06342500 | -5.87493200 |
| H                                  | -5.66451700  | 0.30981700  | -10.01149400 | C | -0.19927000 | -3.66563800 | -5.08495500 |
| O                                  | -5.25109200  | 0.40941800  | -9.12521800  | O | -0.08283000 | -4.86797400 | -4.87997600 |
| H                                  | -5.81336600  | 1.05287300  | -8.68210900  | N | 0.74014400  | -2.76684700 | -4.67808000 |
| H                                  | -8.15119600  | -0.23607000 | -7.15648600  | C | -2.14521100 | -5.84706600 | 7.26994800  |
|                                    |              |             |              | C | -2.64548500 | -4.58518200 | 6.55539800  |
|                                    |              |             |              | C | -1.66229600 | -3.41531700 | 6.65168100  |
| <b><sup>5</sup>TS<sub>3W</sub></b> |              |             |              | O | -0.43462000 | -3.61018600 | 6.67647600  |
| C                                  | -2.87280500  | 6.63572800  | -3.33074200  | N | -2.18935100 | -2.18562200 | 6.68843600  |
| C                                  | -2.96638400  | 5.16609600  | -3.61978200  |   |             |             |             |

|    |             |             |             |   |             |             |             |
|----|-------------|-------------|-------------|---|-------------|-------------|-------------|
| C  | 3.63827000  | -7.79542500 | -0.58425300 | C | 5.11920900  | -1.58734000 | -0.88904800 |
| C  | 3.19405800  | -6.99936900 | -1.82933000 | H | 5.15347500  | -2.68240000 | -0.90384600 |
| C  | 2.23429400  | -5.87712600 | -1.52800300 | H | 5.87806500  | -1.25836400 | -0.16530400 |
| N  | 1.09256500  | -5.61102100 | -2.26622700 | H | -7.64268900 | -0.75202800 | -8.12118300 |
| C  | 2.25406500  | -4.89997400 | -0.55829700 | H | -6.44901300 | 0.33692900  | -7.45627200 |
| C  | 0.47890100  | -4.53177800 | -1.74336100 | H | -6.16065100 | -1.38624600 | -7.40617900 |
| N  | 1.15744600  | -4.07815600 | -0.70549100 | H | -2.85486200 | -3.41970700 | -8.08593500 |
| C  | 8.63527000  | 0.39625100  | 1.14662600  | H | -4.06520500 | -4.51216700 | -7.45775400 |
| N  | 7.85622400  | 1.34564800  | 1.95317100  | H | -4.11606800 | -2.78874300 | -7.02259500 |
| C  | 6.52204900  | 1.52183400  | 1.81573000  | H | -0.69320900 | 6.60699200  | 6.89224600  |
| N  | 5.91623500  | 1.24952400  | 0.68463200  | H | 0.43782200  | 5.28347800  | 6.74379800  |
| N  | 5.83284300  | 2.02788400  | 2.86951700  | H | -1.05775400 | 5.07043300  | 7.61350000  |
| C  | 11.11140800 | 4.13490600  | -2.21705400 | H | 2.82312700  | -8.36259300 | -0.18571100 |
| N  | 11.03070600 | 2.76841200  | -2.71774700 | H | 4.00794800  | -7.12735900 | 0.16544900  |
| C  | 9.90145400  | 2.02267000  | -2.77600400 | H | 4.44207700  | -8.49507300 | -0.84955700 |
| N  | 8.72241200  | 2.54338000  | -2.44464400 | H | 0.02327100  | -7.47729300 | 3.04060100  |
| N  | 9.95704000  | 0.74198100  | -3.14132300 | H | 1.59544200  | -7.58558300 | 3.79524800  |
| C  | -6.93039000 | -0.61065600 | -7.33474900 | H | 0.17889900  | -8.11780800 | 4.65303300  |
| C  | -7.77537900 | -0.74382000 | -6.03840100 | H | -1.97154800 | -5.60551200 | 8.29812100  |
| C  | -7.39973500 | 0.06963900  | -4.81731700 | H | -2.84619000 | -6.65294600 | 7.20697700  |
| C  | -6.31585000 | -0.26789700 | -3.98814500 | H | -1.18945300 | -6.18871700 | 6.86237000  |
| C  | -8.19756700 | 1.15563900  | -4.42338000 | H | -4.91075900 | -3.87904800 | 1.32411000  |
| C  | -6.05936400 | 0.42038000  | -2.80012400 | H | -3.51356000 | -4.82809700 | 0.87634300  |
| C  | -7.95682600 | 1.85590100  | -3.23918300 | H | -3.32339500 | -3.43700700 | 1.91610500  |
| C  | -6.89639700 | 1.47618900  | -2.40842400 | H | 4.84454800  | 2.21494500  | 2.76422600  |
| O  | -6.64148100 | 2.10205500  | -1.22251100 | H | 6.16584400  | 1.89268400  | 3.81398600  |
| C  | 3.75600800  | -1.13992700 | -0.33017300 | H | 4.90455600  | 1.05710000  | 0.59665000  |
| C  | 5.43838900  | -1.01752700 | -2.29966700 | H | 6.41837200  | 1.01097000  | -0.21218100 |
| C  | 6.79740900  | -0.32293700 | -2.43878200 | H | 8.28870400  | 1.73481800  | 2.77941000  |
| O  | 2.93689800  | -2.02954900 | -0.02114800 | H | 8.70492100  | 0.71056000  | 0.10155400  |
| O  | 7.01235300  | 0.67493500  | -1.65528000 | H | 9.63838100  | 0.32490800  | 1.57812100  |
| O  | 7.61015700  | -0.69276400 | -3.29990100 | H | 9.06921100  | 0.17556600  | -3.24581200 |
| C  | -4.58199600 | -0.40635000 | 4.98629800  | H | 10.84795200 | 0.27432200  | -3.22435300 |
| N  | -4.47915300 | 1.55758000  | 2.70185800  | H | 8.59703600  | 3.53957600  | -2.36024300 |
| O  | -3.74996700 | 0.54950000  | 5.08817300  | H | 7.94439100  | 1.87023800  | -2.20202200 |
| C  | -5.57514400 | -0.30818400 | 3.79576000  | H | 11.84861800 | 2.39937300  | -3.18445300 |
| N  | -3.37354200 | 2.02565900  | 1.87109400  | H | 12.12023400 | 4.30745100  | -1.82419400 |
| O  | -4.67471800 | -1.39790300 | 5.72616100  | H | 10.40979800 | 4.27964800  | -1.38717000 |
| C  | -4.90947000 | 0.16857500  | 2.49532900  | H | -2.33800800 | 6.48307700  | 0.00124300  |
| C  | -3.31270100 | 3.49903800  | 2.12874700  | H | -1.67394400 | 8.27344400  | 1.31715700  |
| C  | -2.05231200 | 1.39281300  | 2.22251300  | H | 0.64018100  | 4.70673600  | 0.60579400  |
| C  | -3.66856800 | 1.79621900  | 0.42311400  | H | 0.13212500  | 9.17088300  | 2.73744800  |
| O  | 0.51880700  | -1.40814700 | -1.39055100 | H | 2.44850900  | 5.60380000  | 2.04835500  |
| Fe | 0.72460500  | -2.25378100 | 0.26192200  | H | 2.16139200  | 8.11647500  | 4.44806500  |

|   |             |             |             |                       |             |             |              |
|---|-------------|-------------|-------------|-----------------------|-------------|-------------|--------------|
| H | 2.89818200  | 8.95570800  | 3.07358200  | H                     | -4.10358800 | -3.43701500 | -1.07626200  |
| H | -8.81505300 | -0.48470000 | -6.28519300 | H                     | -4.23652900 | -2.01877700 | -0.07639500  |
| H | -7.81109300 | -1.80751800 | -5.75359200 | H                     | -3.10291100 | -4.11728600 | -5.13416600  |
| H | -9.04747000 | 1.45234100  | -5.04149700 | H                     | -2.11979200 | -5.02097400 | -6.27013900  |
| H | -5.67057100 | -1.10842400 | -4.25171300 | H                     | -0.94243200 | -2.76796300 | -6.85168000  |
| H | -5.23171000 | 0.11883100  | -2.16096800 | H                     | -1.68590800 | -2.12919000 | -5.39081800  |
| H | -8.61198200 | 2.68293700  | -2.95354500 | H                     | 1.48180900  | -3.08335900 | -4.06769800  |
| H | -7.34624700 | 2.72778400  | -1.02958100 | H                     | 0.53544100  | -1.77917200 | -4.65141300  |
| H | 0.37676700  | 1.24723900  | -4.90855500 | H                     | 5.37477400  | -1.80910200 | -3.05558300  |
| H | 1.38498300  | 3.48009900  | -4.53711100 | H                     | 4.69278500  | -0.25116300 | -2.56011700  |
| H | -2.08495100 | 0.89609300  | -4.66698600 | O                     | 3.57491800  | 0.11523700  | -0.21788900  |
| H | -0.02507700 | 5.42947100  | -3.92338600 | H                     | 10.92049600 | 4.84986100  | -2.98988100  |
| H | -5.13783300 | 4.67965400  | -3.47960000 | H                     | 8.15825300  | -0.56030500 | 1.19470000   |
| H | -4.45884900 | 2.33557900  | -4.06245300 | H                     | -2.57113000 | 7.18331600  | -4.19900200  |
| H | -2.13047100 | 6.84126600  | -2.54826400 | H                     | 3.34663800  | 7.29799900  | 3.44305700   |
| H | -3.83881000 | 7.04195700  | -3.00068600 | H                     | -2.32049200 | 5.58984600  | 5.43413200   |
| H | -2.80541400 | -4.77307000 | 5.47992700  | H                     | -0.77794700 | 5.49489300  | 4.57414900   |
| H | -3.62455600 | -4.27690300 | 6.94716400  | H                     | -3.26873500 | 3.63351800  | 6.27473400   |
| H | -1.54102700 | -1.40770100 | 6.67822600  | H                     | -2.79216900 | 2.06084400  | 5.72220100   |
| H | -3.18121100 | -1.95223500 | 6.48438600  | O                     | 0.55953800  | -0.83806200 | 1.14940700   |
| H | -0.67727500 | -5.87498700 | 4.89323000  | H                     | 0.82323800  | 0.20170400  | 0.41312100   |
| H | 0.96288300  | -5.88764300 | 5.49042400  | H                     | 2.13740300  | 0.68299100  | -0.37277300  |
| H | 0.73608300  | -5.38367400 | 1.54910400  | O                     | 1.13706200  | 0.86145900  | -0.44010800  |
| H | 0.52524700  | -3.33807700 | 5.21631800  | H                     | 0.86131400  | 0.14672200  | -1.10718200  |
| H | 0.94280000  | -1.58075300 | 3.34076800  | H                     | -0.44637300 | -1.53133700 | -1.62009400  |
| H | 4.08196400  | -6.57993200 | -2.33095600 |                       |             |             |              |
| H | 2.73205800  | -7.67792100 | -2.56166900 |                       |             |             |              |
| H | 0.80690500  | -6.01246600 | -3.15644500 |                       |             |             |              |
| H | 2.98669400  | -4.72442000 | 0.21971600  |                       |             |             |              |
| H | -0.43033500 | -4.10060700 | -2.14418200 |                       |             |             |              |
| H | -6.03614300 | -1.28912100 | 3.63058600  |                       |             |             |              |
| H | -6.38369800 | 0.38992900  | 4.06735700  |                       |             |             |              |
| H | -4.07256300 | -0.51222600 | 2.26801800  |                       |             |             |              |
| H | -5.62258500 | 0.11467000  | 1.66030700  |                       |             |             |              |
| H | -4.09825500 | 1.54154100  | 3.67275900  |                       |             |             |              |
| H | -1.78570600 | 1.64756200  | 3.25211800  |                       |             |             |              |
| H | -2.13344000 | 0.31155900  | 2.10531900  |                       |             |             |              |
| H | -1.29367300 | 1.77715000  | 1.53732300  |                       |             |             |              |
| H | -3.56792700 | 0.73357600  | 0.19977800  |                       |             |             |              |
| H | -4.68386900 | 2.13333100  | 0.20616000  |                       |             |             |              |
| H | -2.94335500 | 2.35750700  | -0.17261500 |                       |             |             |              |
| H | -2.48560000 | 3.93881000  | 1.56747300  |                       |             |             |              |
| H | -4.26765900 | 3.93176900  | 1.82017000  |                       |             |             |              |
| H | -3.17187800 | 3.64606200  | 3.20151300  |                       |             |             |              |
|   |             |             |             | <b>5<sub>2w</sub></b> |             |             |              |
|   |             |             |             | C                     | -1.81316700 | 4.85853000  | -4.44310200  |
|   |             |             |             | C                     | -3.21583700 | 4.36380100  | -4.23422900  |
|   |             |             |             | C                     | -3.73109600 | 3.72704500  | -3.12749200  |
|   |             |             |             | C                     | -4.32100600 | 4.52003300  | -5.15286600  |
|   |             |             |             | N                     | -5.07869900 | 3.47538200  | -3.30232600  |
|   |             |             |             | C                     | -5.47117000 | 3.95432000  | -4.53111700  |
|   |             |             |             | C                     | -4.45087700 | 5.09341200  | -6.43455900  |
|   |             |             |             | C                     | -6.72941500 | 3.95318300  | -5.15306500  |
|   |             |             |             | C                     | -5.69683800 | 5.09502700  | -7.05263700  |
|   |             |             |             | C                     | -6.82507500 | 4.53141600  | -6.41564900  |
|   |             |             |             | C                     | 1.83202800  | -3.59044500 | -9.24294700  |
|   |             |             |             | C                     | 0.94940800  | -2.86843500 | -8.21382500  |
|   |             |             |             | C                     | -0.30023900 | -3.65232200 | -7.79914600  |
|   |             |             |             | O                     | -1.37935600 | -3.49102800 | -8.36127500  |
|   |             |             |             | N                     | -0.12069100 | -4.50795500 | -6.76228600  |
|   |             |             |             | C                     | 1.90586300  | 1.09645600  | -11.40578300 |
|   |             |             |             | C                     | 1.20791700  | 1.29046700  | -10.07923300 |

|   |              |              |              |    |              |             |              |
|---|--------------|--------------|--------------|----|--------------|-------------|--------------|
| C | -0.18318700  | 1.15707000   | -9.94054600  | N  | -6.28003000  | 4.57979500  | -15.80161800 |
| C | 1.94630900   | 1.59910300   | -8.92507400  | N  | -8.41450700  | 4.58612600  | -16.63450000 |
| C | -0.82008800  | 1.30572600   | -8.70631800  | C  | -9.47973000  | 3.65734700  | 0.53556200   |
| C | 1.32945600   | 1.74500500   | -7.68193100  | C  | -8.80227600  | 2.37981900  | 1.06856900   |
| C | -0.05858700  | 1.58770900   | -7.56625500  | C  | -7.98598100  | 1.49035400  | 0.15194500   |
| O | -0.70598800  | 1.67978800   | -6.36638600  | C  | -8.16336700  | 1.42728700  | -1.23841600  |
| C | -10.82982300 | -7.50329900  | -9.60304800  | C  | -7.05175400  | 0.60833000  | 0.72368200   |
| C | -9.31245000  | -7.39329700  | -9.58533800  | C  | -7.45854300  | 0.51341600  | -2.02849700  |
| C | -8.75015000  | -6.01105900  | -9.66266100  | C  | -6.33423300  | -0.30603400 | -0.04724500  |
| N | -7.40687500  | -5.80469300  | -9.90581300  | C  | -6.54520700  | -0.36200500 | -1.43046800  |
| C | -9.27227500  | -4.76562800  | -9.41781900  | O  | -5.86999500  | -1.23438300 | -2.23854900  |
| C | -7.14799900  | -4.49334600  | -9.78863900  | C  | -7.76220200  | -0.26327600 | -11.51093100 |
| N | -8.26138200  | -3.82956800  | -9.50289300  | C  | -8.66092600  | 1.95504500  | -12.47952000 |
| C | -8.60429300  | -4.29647000  | -4.57697100  | C  | -8.38860700  | 2.74346900  | -13.76657300 |
| C | -8.47027500  | -2.77537200  | -4.46128100  | O  | -8.42184200  | -0.98031500 | -10.70545700 |
| C | -8.46635600  | -1.93824800  | -5.74858200  | O  | -7.20766900  | 2.62472400  | -14.26312700 |
| O | -8.52153300  | -2.54409800  | -6.86961400  | O  | -9.26150300  | 3.47472900  | -14.25901800 |
| O | -8.39921400  | -0.69514000  | -5.62093900  | C  | -3.23781000  | -5.84655200 | -5.18768100  |
| C | -12.51902900 | 2.82123200   | -2.81809300  | N  | -3.63290800  | -2.94345300 | -4.43606800  |
| C | -12.40284400 | 1.86672700   | -4.02433200  | O  | -2.19192100  | -5.17153200 | -4.93259200  |
| C | -11.69416400 | 2.47358400   | -5.23868500  | C  | -4.57399700  | -5.05443700 | -5.15124500  |
| C | -11.99153200 | 1.75463300   | -6.55597800  | N  | -3.07411200  | -1.63044700 | -4.75210500  |
| O | -12.91916700 | 0.96548700   | -6.69052700  | O  | -3.29335200  | -7.05862900 | -5.44643300  |
| N | -11.18472100 | 2.10635000   | -7.59521900  | C  | -4.43315200  | -3.56897900 | -5.50101600  |
| C | -7.55707800  | -10.11222900 | -7.84985100  | C  | -2.47993700  | -1.13666900 | -3.46925200  |
| C | -6.73466500  | -8.99301900  | -7.19691600  | C  | -2.00556900  | -1.68466400 | -5.80511600  |
| C | -5.81498100  | -8.29090600  | -8.19963100  | C  | -4.16718600  | -0.69412200 | -5.17353000  |
| O | -6.14764700  | -8.16651300  | -9.38928900  | O  | -8.25618500  | 0.12484500  | -8.07458000  |
| N | -4.65644800  | -7.79976900  | -7.73966500  | Fe | -8.22369600  | -1.85961200 | -8.82460300  |
| C | -13.81896800 | -3.24655400  | -11.39705700 | C  | -8.57939200  | 0.40829700  | -12.63274600 |
| C | -13.67008500 | -1.90384800  | -10.65013100 | H  | -9.58721400  | -0.02094200 | -12.65885400 |
| C | -12.42854400 | -1.80387300  | -9.79968400  | H  | -8.09387800  | 0.14608100  | -13.58210900 |
| N | -12.41687300 | -1.31297700  | -8.50460700  | H  | -9.88861200  | 4.08493100  | 1.42770600   |
| C | -11.11152100 | -2.10828600  | -10.06355100 | H  | -8.78346000  | 4.34237100  | 0.09917400   |
| C | -11.15218500 | -1.34286100  | -8.03987700  | H  | -10.29176300 | 3.45534600  | -0.17047400  |
| N | -10.33473800 | -1.82011600  | -8.96072800  | H  | -12.81330300 | 3.77756800  | -3.19765100  |
| C | -6.56285800  | 0.53747700   | -16.69787100 | H  | -13.29208600 | 2.43459200  | -2.18761700  |
| N | -5.24041600  | 0.09558800   | -16.22974100 | H  | -11.58578700 | 2.92827100  | -2.25716900  |
| C | -4.94262000  | -0.10635400  | -14.92378300 | H  | 2.83132600   | -3.21092100 | -9.19428000  |
| N | -5.56773400  | 0.54871600   | -13.97508500 | H  | 1.46512400   | -3.50124000 | -10.24412700 |
| N | -3.94888000  | -0.97970000  | -14.62305800 | H  | 1.90062100   | -4.66484800 | -9.01545500  |
| C | -5.29192100  | 5.77747600   | -18.23089400 | H  | -14.00775100 | -4.04579600 | -10.71115900 |
| N | -6.68198100  | 5.45626500   | -17.93072200 | H  | -12.92709900 | -3.45464200 | -11.95043000 |
| C | -7.12350300  | 4.88283400   | -16.78501700 | H  | -14.65826700 | -3.19647900 | -12.10348100 |

|   |              |              |              |   |              |             |              |
|---|--------------|--------------|--------------|---|--------------|-------------|--------------|
| H | -11.30569300 | -6.91770100  | -8.84448900  | H | -1.15560200  | 4.56737600  | -3.61262000  |
| H | -11.24204100 | -7.25320200  | -10.55818500 | H | -7.38933400  | -8.21606400 | -6.76638700  |
| H | -11.11099000 | -8.54864000  | -9.41053300  | H | -6.14106700  | -9.38163100 | -6.35713500  |
| H | -6.87262500  | -10.81098600 | -8.28452400  | H | -4.06752700  | -7.32058100 | -8.41058800  |
| H | -8.19107000  | -10.62065400 | -7.15393100  | H | -4.32724800  | -7.75060800 | -6.75957000  |
| H | -8.17542100  | -9.73051800  | -8.66646500  | H | -8.93164600  | -7.84058200 | -8.65807300  |
| H | -8.37275700  | -4.77041000  | -3.64592600  | H | -8.88330000  | -7.99774300 | -10.39698700 |
| H | -9.59587100  | -4.56322600  | -4.87657600  | H | -10.28702100 | -4.49097500 | -9.16053500  |
| H | -7.91769400  | -4.69345400  | -5.33320500  | H | -6.73040300  | -6.58566100 | -9.96221800  |
| H | -3.67157100  | -1.08938400  | -13.65643200 | H | -6.16501700  | -4.04615600 | -9.88788000  |
| H | -3.72919900  | -1.74436000  | -15.24595200 | H | -13.66363900 | -1.07942800 | -11.38231900 |
| H | -5.64834300  | 0.22196700   | -12.99103800 | H | -14.55117500 | -1.72953000 | -10.01503700 |
| H | -6.20825500  | 1.36286700   | -14.16106200 | H | -13.16369700 | -0.83989700 | -8.00081700  |
| H | -4.60326900  | -0.29539700  | -16.90979000 | H | -10.67133100 | -2.50306200 | -10.97121600 |
| H | -6.76166800  | 1.57923700   | -16.43156700 | H | -10.87061600 | -1.00132700 | -7.05164500  |
| H | -6.59779300  | 0.42080700   | -17.78538900 | H | -5.28175100  | -5.51365400 | -5.85088100  |
| H | -8.77193500  | 4.19040500   | -15.72044700 | H | -5.01104600  | -5.16198500 | -4.14567200  |
| H | -9.04957700  | 4.65881900   | -17.41586000 | H | -3.96031500  | -3.48918500 | -6.49448600  |
| H | -5.33703300  | 4.93448500   | -15.79540500 | H | -5.42194900  | -3.10323900 | -5.55837600  |
| H | -6.60067000  | 3.87156500   | -15.08420000 | H | -2.82119200  | -3.59559900 | -4.36111100  |
| H | -7.38393500  | 5.85751600   | -18.53843000 | H | -1.21803000  | -2.35688800 | -5.45459000  |
| H | -5.15921100  | 5.78463100   | -19.31901100 | H | -2.41810900  | -2.08463300 | -6.73382700  |
| H | -4.62320600  | 5.00779000   | -17.82801800 | H | -1.61448200  | -0.67798000 | -5.97342900  |
| H | -0.09089500  | 1.98140700   | -5.69177600  | H | -4.56446500  | -1.01850500 | -6.13546500  |
| H | 1.93214600   | 1.97521500   | -6.79938900  | H | -4.94646600  | -0.71876500 | -4.40932300  |
| H | -1.90191300  | 1.20221900   | -8.61873100  | H | -3.74546000  | 0.30937200  | -5.27486300  |
| H | 3.02941500   | 1.72167300   | -8.99196200  | H | -2.00989300  | -0.16375200 | -3.64294500  |
| H | -0.79228300  | 0.92581100   | -10.81711700 | H | -3.28392400  | -1.05191200 | -2.73620400  |
| H | 2.60102200   | 0.24399600   | -11.36518400 | H | -1.73409000  | -1.86207100 | -3.12994300  |
| H | 2.50286300   | 1.98130500   | -11.67409500 | H | -9.26965700  | -2.35939100 | -3.82872900  |
| H | -8.15549900  | 2.67244000   | 1.91105600   | H | -7.54164500  | -2.50524800 | -3.94114000  |
| H | -9.58661800  | 1.74915200   | 1.52382600   | H | -11.90720800 | 0.92643700  | -3.73726900  |
| H | -6.88397900  | 0.62809100   | 1.80280400   | H | -13.41578500 | 1.58364900  | -4.34328100  |
| H | -8.88189600  | 2.08691600   | -1.72471600  | H | -12.02320800 | 3.51683500  | -5.38715700  |
| H | -7.63735000  | 0.44395800   | -3.10067100  | H | -10.60482700 | 2.52203500  | -5.08790100  |
| H | -5.61571100  | -0.97764400  | 0.42901200   | H | -11.27679900 | 1.60847700  | -8.47055100  |
| H | -5.50938900  | -1.96496100  | -1.72735600  | H | -10.30829200 | 2.58264700  | -7.44109300  |
| H | -7.79050900  | 4.55449700   | -6.92393000  | H | -9.64210600  | 2.24677000  | -12.08701400 |
| H | -5.80975300  | 5.53954600   | -8.04281000  | H | -7.90154200  | 2.29457100  | -11.75930700 |
| H | -7.60083300  | 3.51996700   | -4.66298200  | O | -6.52864400  | -0.04442200 | -11.46882400 |
| H | -3.58696000  | 5.53367000   | -6.93465200  | H | -5.02344800  | 6.74018500  | -17.84883400 |
| H | -3.23635000  | 3.44154000   | -2.20217800  | H | -7.30299500  | -0.08970000 | -16.24657800 |
| H | -5.67955200  | 3.02310200   | -2.62940500  | H | -1.80094800  | 5.92621500  | -4.51149500  |
| H | -1.38356100  | 4.46429900   | -5.37357600  | H | 1.21891700   | 0.91528300  | -12.20589600 |

|   |             |             |             |   |             |             |             |
|---|-------------|-------------|-------------|---|-------------|-------------|-------------|
| H | 1.54792100  | -2.64907800 | -7.31603800 | C | -3.87800800 | -0.11472200 | -0.35607800 |
| H | 0.60944100  | -1.90679600 | -8.61390500 | O | -3.44107900 | -1.33049000 | -0.35971400 |
| H | 0.78145800  | -4.58446400 | -6.31585600 | O | -3.32558500 | 0.82008000  | -0.94236500 |
| H | -0.91194400 | -4.94952400 | -6.26836900 | C | -5.89842000 | 2.44030000  | -6.25826600 |
| O | -6.61149900 | -1.91427200 | -8.74185800 | C | -5.31455800 | 1.21370500  | -5.53820100 |
| H | -5.55986800 | -0.26324700 | -8.69794900 | C | -3.85454100 | 1.39288300  | -5.09329300 |
| H | -5.85456400 | 0.62905600  | -9.84224700 | C | -3.12242100 | 0.06995100  | -4.84962700 |
| O | -5.65025500 | 0.68279500  | -8.88935200 | O | -3.15178900 | -0.83739300 | -5.66825400 |
| H | -7.36419500 | 0.49299000  | -8.27945000 | N | -2.37566800 | 0.00360300  | -3.70932900 |
| H | -8.27949900 | -0.03839900 | -7.07989400 | C | -5.32711700 | -5.96689100 | 5.83337100  |

**<sup>5</sup>TS<sub>2-3</sub>**

|   |             |             |             |   |             |             |             |
|---|-------------|-------------|-------------|---|-------------|-------------|-------------|
| C | 1.55117200  | 7.69346800  | -0.06674300 | C | -3.37326500 | -4.33144700 | 5.66784200  |
| C | 0.70566400  | 6.66330100  | -0.76252900 | O | -2.62033300 | -5.28691300 | 5.42272900  |
| C | -0.66546500 | 6.65655100  | -0.88500200 | N | -2.88469400 | -3.10590100 | 5.92163400  |
| C | 1.17651500  | 5.53341400  | -1.53245900 | C | -2.79063900 | -7.34868300 | -3.68452500 |
| N | -1.07400000 | 5.60298200  | -1.67644600 | C | -2.66677500 | -6.04597100 | -4.49205500 |
| C | 0.02879400  | 4.89455100  | -2.08952800 | C | -2.75312200 | -4.82783000 | -3.62412100 |
| C | 2.45325000  | 5.00117700  | -1.80995800 | N | -3.86372800 | -4.00843400 | -3.55544600 |
| C | 0.12850900  | 3.75397400  | -2.90140900 | C | -1.89443900 | -4.32658300 | -2.67558100 |
| C | 2.55413900  | 3.86741300  | -2.61316500 | C | -3.65320100 | -3.07040900 | -2.60750100 |
| C | 1.40230900  | 3.25092900  | -3.15427400 | N | -2.46710800 | -3.24141000 | -2.05125900 |
| C | 3.25625500  | 1.39767100  | 8.00517200  | C | 6.45109500  | -5.16866100 | -1.46937200 |
| C | 2.42313800  | 2.10278400  | 6.92473100  | N | 6.51614600  | -4.54394300 | -0.13440400 |
| C | 1.63357100  | 1.17426100  | 6.00716100  | C | 5.45356900  | -3.90023000 | 0.41173100  |
| O | 1.93962500  | 1.07493400  | 4.81330200  | N | 4.59511300  | -3.26762400 | -0.35486200 |
| N | 0.61724100  | 0.48149600  | 6.54661500  | N | 5.31346700  | -3.91602100 | 1.75861800  |
| C | 6.96300500  | 2.71588100  | 4.66288800  | C | 10.52732300 | -2.54012400 | -4.27973600 |
| C | 6.65840600  | 3.75032500  | 3.60129200  | N | 9.33030100  | -3.07424900 | -4.92304100 |
| C | 6.84557600  | 3.48155700  | 2.23485700  | C | 8.05327300  | -2.73311100 | -4.61807300 |
| C | 6.19978900  | 5.03218000  | 3.94660500  | N | 7.77637500  | -1.96147300 | -3.56928200 |
| C | 6.59325500  | 4.44093700  | 1.25259900  | N | 7.03982600  | -3.20029100 | -5.34690500 |
| C | 5.94116500  | 6.00457500  | 2.97761200  | C | -6.52346500 | 6.59623500  | -4.38184800 |
| C | 6.14000400  | 5.71602900  | 1.61880800  | C | -7.07298400 | 6.45187700  | -2.94235600 |
| O | 5.90626300  | 6.61625700  | 0.62738200  | C | -6.10585700 | 5.97985100  | -1.87261500 |
| C | -4.50598300 | -7.18875200 | 1.54106700  | C | -5.55118300 | 4.68674700  | -1.88056700 |
| C | -3.69703200 | -6.39174200 | 2.55542500  | C | -5.76007300 | 6.81619700  | -0.80020200 |
| C | -2.76020200 | -5.36410800 | 2.00468900  | C | -4.69891800 | 4.23976300  | -0.86961900 |
| N | -1.84786200 | -4.72775600 | 2.82546100  | C | -4.91448300 | 6.38626900  | 0.22770200  |
| C | -2.65922700 | -4.72954600 | 0.79304300  | C | -4.38298800 | 5.09063200  | 0.20142400  |
| C | -1.26087700 | -3.73806300 | 2.13491300  | O | -3.55891200 | 4.61275700  | 1.17628300  |
| N | -1.72321200 | -3.71563400 | 0.88924800  | C | 1.29787000  | -2.45664500 | -1.33652800 |
| C | -5.74867500 | -0.95104100 | 1.32837200  | C | 2.98424900  | -1.57830600 | -3.09293400 |
| C | -5.19037300 | 0.13658100  | 0.39477200  | C | 4.34612900  | -2.04084100 | -3.62616900 |
|   |             |             |             | O | 0.05100800  | -2.20714700 | -1.50955400 |

|    |             |             |             |   |             |             |             |
|----|-------------|-------------|-------------|---|-------------|-------------|-------------|
| O  | 5.25534700  | -2.24535500 | -2.73752700 | H | 6.05788100  | -2.83548900 | -5.18716700 |
| O  | 4.53178800  | -2.20231900 | -4.84191700 | H | 7.20749400  | -3.84430900 | -6.10578200 |
| C  | -2.25169100 | -0.10195500 | 4.43597400  | H | 8.50734700  | -1.48923800 | -3.06241600 |
| N  | -0.22491700 | 1.69172000  | 2.73960600  | H | 6.78155300  | -1.95985800 | -3.20993800 |
| O  | -1.05644100 | -0.49252400 | 4.58125900  | H | 9.47083000  | -3.49690200 | -5.83152800 |
| C  | -2.48472200 | 1.01959100  | 3.38760700  | H | 11.34897000 | -3.25154500 | -4.41980500 |
| N  | 0.86111800  | 1.83586300  | 1.77822900  | H | 10.37506000 | -2.42988800 | -3.20020400 |
| O  | -3.26396700 | -0.48476200 | 5.04645400  | H | 5.65612900  | 7.46460000  | 1.00539300  |
| C  | -1.46870700 | 1.15950200  | 2.26773700  | H | 5.58714000  | 6.99301500  | 3.28188000  |
| C  | 1.75297700  | 2.91999100  | 2.31596800  | H | 6.75088300  | 4.22043500  | 0.19639300  |
| C  | 1.63659200  | 0.54873700  | 1.64666000  | H | 6.04182500  | 5.28491300  | 4.99742400  |
| C  | 0.34052500  | 2.24929000  | 0.43323800  | H | 7.20485500  | 2.49735700  | 1.92453000  |
| Fe | -1.59342000 | -2.06323900 | -0.37082300 | H | 6.13711700  | 2.61841400  | 5.38054400  |
| C  | 2.08660600  | -2.76014300 | -2.62584600 | H | 7.86030400  | 2.99294400  | 5.23844500  |
| H  | 1.39624700  | -3.03867900 | -3.42961700 | H | -7.47089000 | 7.42769400  | -2.62684900 |
| H  | 2.70269400  | -3.64436400 | -2.40585100 | H | -7.94442400 | 5.77618500  | -2.96131400 |
| H  | -7.20714000 | 7.23513300  | -4.90173500 | H | -6.17078900 | 7.82701400  | -0.74945600 |
| H  | -5.54959900 | 7.03915000  | -4.38532100 | H | -5.80648200 | 3.99620200  | -2.68519600 |
| H  | -6.46478000 | 5.63518400  | -4.90405500 | H | -4.29146400 | 3.22851700  | -0.88605200 |
| H  | -5.34238900 | 2.60127500  | -7.15836400 | H | -4.67871700 | 7.06221200  | 1.05407900  |
| H  | -6.92493300 | 2.26097700  | -6.50052000 | H | -3.48342500 | 5.26216300  | 1.88144700  |
| H  | -5.83846900 | 3.34721700  | -5.64535000 | H | 1.50989100  | 2.36918600  | -3.78786500 |
| H  | 3.88484200  | 2.12958800  | 8.46813100  | H | 3.53806600  | 3.45276000  | -2.84084300 |
| H  | 3.86104700  | 0.61269400  | 7.60136700  | H | -0.75605000 | 3.27697200  | -3.32167300 |
| H  | 2.62291900  | 0.95727700  | 8.78806100  | H | 3.35082100  | 5.47292600  | -1.40870300 |
| H  | -3.74789300 | -7.44901600 | -3.21705200 | H | -1.39674100 | 7.34657000  | -0.47406900 |
| H  | -2.02310000 | -7.40497500 | -2.94108100 | H | -2.03621800 | 5.37032300  | -1.87613300 |
| H  | -2.66567900 | -8.21447700 | -4.35178600 | H | 2.29413300  | 7.23365700  | 0.60041000  |
| H  | -5.05384600 | -6.57873900 | 0.85360300  | H | 0.93676900  | 8.37817000  | 0.53237500  |
| H  | -3.88772000 | -7.87209200 | 0.99736000  | H | -5.26819900 | -4.07628600 | 4.72425300  |
| H  | -5.24577600 | -7.79894700 | 2.07814400  | H | -5.32896500 | -3.87394100 | 6.46302800  |
| H  | -4.96674100 | -6.32828900 | 6.77417200  | H | -1.88234200 | -2.99369400 | 5.82132600  |
| H  | -6.38653500 | -6.10661300 | 5.78024300  | H | -3.37731700 | -2.20962200 | 5.80063300  |
| H  | -4.86782900 | -6.59981100 | 5.06828500  | H | -4.38738300 | -5.85861800 | 3.22166300  |
| H  | -6.53701500 | -0.49961200 | 1.89396200  | H | -3.13552900 | -7.07621000 | 3.20708000  |
| H  | -6.13629300 | -1.77943000 | 0.77374600  | H | -3.20644300 | -4.91191900 | -0.12289900 |
| H  | -4.99095500 | -1.31818500 | 2.02942700  | H | -1.78818200 | -4.92252600 | 3.83905200  |
| H  | 4.58786600  | -3.35582100 | 2.18623800  | H | -0.55122500 | -3.03265200 | 2.55146600  |
| H  | 5.69437700  | -4.67120400 | 2.31154400  | H | -1.70547700 | -6.03383900 | -5.02667500 |
| H  | 3.63701800  | -2.98360800 | -0.06835000 | H | -3.44271000 | -6.00143700 | -5.27026800 |
| H  | 4.87502900  | -2.92116800 | -1.31092000 | H | -4.66323700 | -4.04089000 | -4.17455300 |
| H  | 7.25467600  | -4.82863300 | 0.49440300  | H | -0.91020300 | -4.68627400 | -2.39944800 |
| H  | 6.60063700  | -4.44103600 | -2.27171600 | H | -4.36332000 | -2.29624500 | -2.34653300 |
| H  | 7.20615200  | -5.95856200 | -1.52568300 | H | -3.47503900 | 0.87876200  | 2.94521200  |



|           |             |             |             |   |             |             |             |
|-----------|-------------|-------------|-------------|---|-------------|-------------|-------------|
| H         | -2.53144600 | 1.97111200  | 3.94410200  | C | 1.07405700  | 3.41538700  | -3.34432100 |
| H         | -1.31194500 | 0.10790600  | 1.72287200  | C | 3.25597000  | 1.39833100  | 8.00521100  |
| H         | -1.88412600 | 1.77923700  | 1.46625700  | C | 2.47202500  | 2.17082000  | 6.93494600  |
| H         | 0.14009700  | 1.14664100  | 3.53418200  | C | 1.63213700  | 1.41097900  | 5.91725100  |
| H         | 2.02609600  | 0.30113600  | 2.63764200  | O | 1.71590800  | 1.73967100  | 4.72384900  |
| H         | 0.95508300  | -0.22581800 | 1.28071900  | N | 0.79873600  | 0.45332100  | 6.34053600  |
| H         | 2.45046500  | 0.70912700  | 0.93253700  | C | 6.96251000  | 2.71718200  | 4.66290200  |
| H         | -0.22867700 | 1.42519400  | -0.00005000 | C | 6.61649700  | 3.73714200  | 3.59935100  |
| H         | -0.28345100 | 3.13776300  | 0.55127400  | C | 6.79566100  | 3.46351000  | 2.23268200  |
| H         | 1.19877000  | 2.48473800  | -0.20181300 | C | 6.12860900  | 5.00910800  | 3.94074800  |
| H         | 2.58975400  | 3.05876600  | 1.62511900  | C | 6.50842200  | 4.40891400  | 1.24661700  |
| H         | 1.16317200  | 3.83707800  | 2.39119300  | C | 5.83493600  | 5.96766800  | 2.96779500  |
| H         | 2.10671100  | 2.59987600  | 3.30009800  | C | 6.02653100  | 5.67450200  | 1.60894100  |
| H         | -5.93546800 | 0.38830400  | -0.37858500 | O | 5.75756300  | 6.56071200  | 0.61347700  |
| H         | -5.04310700 | 1.07637100  | 0.94454200  | C | -4.50471200 | -7.18950200 | 1.54106700  |
| H         | -5.93113000 | 0.95305300  | -4.66162300 | C | -3.69776100 | -6.40080200 | 2.56308900  |
| H         | -5.35978100 | 0.34936000  | -6.21726600 | C | -2.73441600 | -5.39760300 | 2.01597200  |
| H         | -3.28513800 | 1.88462300  | -5.90005200 | N | -1.81972300 | -4.76784900 | 2.83897900  |
| H         | -3.78675600 | 2.05267900  | -4.21767900 | C | -2.60781600 | -4.78530300 | 0.79582500  |
| H         | -1.90532700 | -0.87707000 | -3.54008500 | C | -1.20662900 | -3.80199600 | 2.14028600  |
| H         | -2.60354000 | 0.54405800  | -2.87504600 | N | -1.65469000 | -3.78776300 | 0.88732600  |
| H         | 2.46625700  | -1.00726000 | -3.87277700 | C | -5.74847400 | -0.95201900 | 1.32839900  |
| H         | 3.18248300  | -0.89975300 | -2.25204400 | C | -5.14541700 | 0.12887500  | 0.42105600  |
| O         | 1.88908000  | -2.48621700 | -0.24764400 | C | -3.83569400 | -0.15666700 | -0.32132300 |
| H         | 10.79742800 | -1.60273700 | -4.71927700 | O | -3.34332000 | -1.34795100 | -0.19335900 |
| H         | 5.46956600  | -5.58933300 | -1.53621900 | O | -3.31667100 | 0.72983000  | -1.00242300 |
| H         | 2.07529800  | 8.27087800  | -0.79946900 | C | -5.89887600 | 2.43930600  | -6.25826100 |
| H         | 7.14086800  | 1.75312600  | 4.23098700  | C | -5.31974000 | 1.20293600  | -5.55004400 |
| H         | 1.72667400  | 2.81202000  | 7.40110900  | C | -3.85436200 | 1.36298800  | -5.11615900 |
| H         | 3.08014600  | 2.68991800  | 6.27231800  | C | -3.12832300 | 0.03035000  | -4.90677600 |
| H         | 0.33188200  | 0.64463400  | 7.50136000  | O | -3.17246900 | -0.86115000 | -5.74161200 |
| H         | -0.02362900 | -0.03504300 | 5.91165300  | N | -2.36928100 | -0.06062500 | -3.77642200 |
| O         | -1.00667300 | -0.96320000 | 0.79665700  | C | -5.32603200 | -5.96780000 | 5.83334500  |
|           |             |             |             | C | -4.93785600 | -4.49591600 | 5.66191900  |
|           |             |             |             | C | -3.42601600 | -4.25528900 | 5.58885600  |
| <b>53</b> |             |             |             | O | -2.63132700 | -5.19433000 | 5.40957200  |
| C         | 1.54978400  | 7.69380900  | -0.06673700 | N | -3.01261900 | -2.98665800 | 5.69554300  |
| C         | 0.62973500  | 6.73087500  | -0.76360700 | C | -2.78933800 | -7.34911200 | -3.68451200 |
| C         | -0.74581400 | 6.77187400  | -0.80437100 | C | -2.67393600 | -6.03620200 | -4.47940400 |
| C         | 1.01779500  | 5.62612500  | -1.61224400 | C | -2.76266300 | -4.82725600 | -3.59807300 |
| N         | -1.23387500 | 5.77227900  | -1.62032700 | N | -3.89494700 | -4.04454900 | -3.46989000 |
| C         | -0.18043300 | 5.05119500  | -2.12997100 | C | -1.87833700 | -4.30703200 | -2.68437000 |
| C         | 2.25823400  | 5.06841600  | -1.98821900 | C | -3.67081900 | -3.10811100 | -2.52238600 |
| C         | -0.16502100 | 3.94736300  | -2.99656400 | N | -2.45541900 | -3.24593700 | -2.02342700 |
| C         | 2.27510700  | 3.97013100  | -2.84468400 |   |             |             |             |

|    |             |             |             |   |             |             |             |
|----|-------------|-------------|-------------|---|-------------|-------------|-------------|
| C  | 6.45200800  | -5.16745100 | -1.46937500 | H | -5.83549100 | 3.34204900  | -5.63998300 |
| N  | 6.51982800  | -4.53902500 | -0.13708100 | H | 3.88449400  | 2.13032500  | 8.46809100  |
| C  | 5.45701000  | -3.88443400 | 0.39590600  | H | 3.86091100  | 0.61343000  | 7.60135700  |
| N  | 4.61737200  | -3.24034400 | -0.37995600 | H | 2.60742600  | 0.96769900  | 8.78092000  |
| N  | 5.29710500  | -3.90202600 | 1.74116300  | H | -3.74657400 | -7.44963800 | -3.21706400 |
| C  | 10.52777100 | -2.53818800 | -4.27973900 | H | -2.02178000 | -7.40528700 | -2.94109000 |
| N  | 9.33732000  | -3.07777400 | -4.92904100 | H | -2.66372700 | -8.20862900 | -4.35913600 |
| C  | 8.06043000  | -2.72322900 | -4.63903000 | H | -5.05267600 | -6.57958800 | 0.85359600  |
| N  | 7.78301600  | -1.93543200 | -3.60286200 | H | -3.88632400 | -7.87273200 | 0.99735600  |
| N  | 7.04903700  | -3.19144200 | -5.36977700 | H | -5.24708000 | -7.80111000 | 2.07335100  |
| C  | -6.52464800 | 6.59510200  | -4.38185700 | H | -4.96563900 | -6.32911100 | 6.77418100  |
| C  | -7.08369600 | 6.46396200  | -2.94543700 | H | -6.38545400 | -6.10769500 | 5.78025000  |
| C  | -6.13986600 | 5.96905700  | -1.86627000 | H | -4.86470100 | -6.59475100 | 5.06477100  |
| C  | -5.56470100 | 4.68568100  | -1.90523700 | H | -6.53695500 | -0.50072800 | 1.89393300  |
| C  | -5.84492000 | 6.76812600  | -0.75116400 | H | -6.13599600 | -1.78046200 | 0.77373900  |
| C  | -4.74217600 | 4.21257200  | -0.88223400 | H | -5.00628800 | -1.32655400 | 2.04218800  |
| C  | -5.02960500 | 6.31092300  | 0.28938300  | H | 4.56362300  | -3.34149800 | 2.15488200  |
| C  | -4.47896300 | 5.02431000  | 0.23269600  | H | 5.65209300  | -4.66961800 | 2.29439100  |
| O  | -3.68464200 | 4.51755500  | 1.21558100  | H | 3.64844600  | -2.96246300 | -0.11367800 |
| C  | 1.33720700  | -2.46737100 | -1.37132800 | H | 4.90496100  | -2.90224600 | -1.33496800 |
| C  | 3.00051500  | -1.55375100 | -3.12974600 | H | 7.24340400  | -4.84064900 | 0.50112200  |
| C  | 4.36370200  | -2.01206800 | -3.66089500 | H | 6.60215800  | -4.44207300 | -2.27380200 |
| O  | 0.08724600  | -2.20927400 | -1.51798300 | H | 7.20724000  | -5.95722100 | -1.52572200 |
| O  | 5.27075100  | -2.21802900 | -2.77100300 | H | 6.06858200  | -2.81881100 | -5.21798400 |
| O  | 4.55027300  | -2.17339000 | -4.87679600 | H | 7.21700500  | -3.84760400 | -6.11804600 |
| C  | -2.30095000 | -0.00203300 | 4.58592100  | H | 8.51556800  | -1.46800700 | -3.09388400 |
| N  | -0.19527200 | 2.22380900  | 2.75443700  | H | 6.78749100  | -1.93218900 | -3.24302400 |
| O  | -1.22209400 | -0.63892300 | 4.77070200  | H | 9.48452200  | -3.50842100 | -5.83268100 |
| C  | -2.16247600 | 1.45021800  | 4.00313900  | H | 11.35300200 | -3.24659900 | -4.41387500 |
| N  | 0.73884000  | 2.16822200  | 1.63440500  | H | 10.36916000 | -2.42726900 | -3.20113300 |
| O  | -3.45787200 | -0.38357000 | 4.82962900  | H | 5.50207400  | 7.40880100  | 0.98832300  |
| C  | -1.43150400 | 1.56545700  | 2.69744300  | H | 5.45785200  | 6.94840200  | 3.26914900  |
| C  | 1.64809100  | 3.34671400  | 1.83134600  | H | 6.66050000  | 4.18494700  | 0.19027000  |
| C  | 1.54752400  | 0.89320500  | 1.63683400  | H | 5.97485400  | 5.26538500  | 4.99127300  |
| C  | 0.01307500  | 2.30033300  | 0.33048100  | H | 7.17720900  | 2.48689800  | 1.92508000  |
| Fe | -1.52361800 | -2.10642200 | -0.33259800 | H | 6.15798500  | 2.61585400  | 5.40365600  |
| C  | 2.10919700  | -2.74526000 | -2.67387300 | H | 7.87216200  | 3.00979100  | 5.21063400  |
| H  | 1.40960200  | -3.00942500 | -3.47458600 | H | -7.46131200 | 7.44904600  | -2.63369600 |
| H  | 2.72969600  | -3.63225800 | -2.47869200 | H | -7.97134200 | 5.80930300  | -2.97040800 |
| H  | -7.20844000 | 7.23390800  | -4.90173300 | H | -6.27279800 | 7.77030300  | -0.67670900 |
| H  | -5.55087200 | 7.03822400  | -4.38532700 | H | -5.77970100 | 4.02394900  | -2.74483400 |
| H  | -6.46872700 | 5.63209900  | -4.90045100 | H | -4.31858900 | 3.20925000  | -0.92256600 |
| H  | -5.34286400 | 2.60037800  | -7.15836700 | H | -4.83359300 | 6.95673600  | 1.14945000  |
| H  | -6.92534500 | 2.25979400  | -6.50053100 | H | -3.64200200 | 5.13422300  | 1.95221300  |

|   |             |             |             |                                     |             |             |             |
|---|-------------|-------------|-------------|-------------------------------------|-------------|-------------|-------------|
| H | 1.11488100  | 2.55965600  | -4.02030100 | H                                   | 2.48225500  | -0.98006000 | -3.90758800 |
| H | 3.22962500  | 3.53581200  | -3.14809900 | H                                   | 3.19311300  | -0.88004000 | -2.28363000 |
| H | -1.08779500 | 3.51919100  | -3.38559100 | O                                   | 1.93761000  | -2.51936300 | -0.28927100 |
| H | 3.19241200  | 5.49362100  | -1.61844400 | H                                   | 10.79770100 | -1.60075000 | -4.71927900 |
| H | -1.42878400 | 7.46135400  | -0.31620300 | H                                   | 5.47055600  | -5.58830000 | -1.53622300 |
| H | -2.21304900 | 5.57767700  | -1.77453900 | H                                   | 2.07380900  | 8.27129600  | -0.79947900 |
| H | 2.29391400  | 7.17537000  | 0.55383300  | H                                   | 7.14054300  | 1.75446300  | 4.23097400  |
| H | 0.99201100  | 8.38484700  | 0.57863900  | H                                   | 1.79414700  | 2.88681400  | 7.43024600  |
| H | -5.36981000 | -4.07715200 | 4.73670500  | H                                   | 3.16251700  | 2.77564600  | 6.33537200  |
| H | -5.35586400 | -3.88364900 | 6.47550700  | H                                   | 0.70334600  | 0.26109700  | 7.32754000  |
| H | -2.03190000 | -2.76913500 | 5.53984300  | H                                   | 0.10123400  | 0.02279100  | 5.68833600  |
| H | -3.58420800 | -2.14189600 | 5.56268900  | O                                   | -0.79425800 | -0.97717800 | 0.93155000  |
| H | -4.38709100 | -5.84998100 | 3.21600500  |                                     |             |             |             |
| H | -3.15785100 | -7.09165600 | 3.22631800  |                                     |             |             |             |
| H | -3.14784200 | -4.97319800 | -0.12318900 |                                     |             |             |             |
| H | -1.79442700 | -4.92969800 | 3.86470200  |                                     |             |             |             |
| H | -0.48498700 | -3.10520800 | 2.55109300  |                                     |             |             |             |
| H | -1.71371400 | -6.01123800 | -5.01497400 |                                     |             |             |             |
| H | -3.45150600 | -5.98708100 | -5.25579200 |                                     |             |             |             |
| H | -4.72283700 | -4.10166000 | -4.04882000 |                                     |             |             |             |
| H | -0.87124000 | -4.63628300 | -2.45783100 |                                     |             |             |             |
| H | -4.39406800 | -2.35969200 | -2.22340900 |                                     |             |             |             |
| H | -3.17452700 | 1.86078100  | 3.89106800  |                                     |             |             |             |
| H | -1.65667300 | 2.05136700  | 4.77739900  |                                     |             |             |             |
| H | -1.30273400 | -0.57351500 | 1.65195700  |                                     |             |             |             |
| H | -2.01920900 | 1.73573900  | 1.79707700  |                                     |             |             |             |
| H | 0.36357200  | 1.99931100  | 3.59533200  |                                     |             |             |             |
| H | 2.04706000  | 0.82078300  | 2.60591000  |                                     |             |             |             |
| H | 0.86099800  | 0.05524000  | 1.46904700  |                                     |             |             |             |
| H | 2.27626600  | 0.95053900  | 0.82175500  |                                     |             |             |             |
| H | -0.54305200 | 1.37929400  | 0.14427100  |                                     |             |             |             |
| H | -0.65365100 | 3.16308900  | 0.38468300  |                                     |             |             |             |
| H | 0.75708400  | 2.45254600  | -0.45631200 |                                     |             |             |             |
| H | 2.39883300  | 3.35084400  | 1.03699400  |                                     |             |             |             |
| H | 1.04345900  | 4.25532400  | 1.79098800  |                                     |             |             |             |
| H | 2.12378900  | 3.24542800  | 2.81059000  |                                     |             |             |             |
| H | -5.86998000 | 0.44203800  | -0.34806100 |                                     |             |             |             |
| H | -4.95288100 | 1.04022100  | 1.00539500  |                                     |             |             |             |
| H | -5.93167500 | 0.94115300  | -4.67056900 |                                     |             |             |             |
| H | -5.37922300 | 0.34474300  | -6.23582400 |                                     |             |             |             |
| H | -3.28900600 | 1.86740200  | -5.91790600 |                                     |             |             |             |
| H | -3.77392200 | 2.00317100  | -4.22749400 |                                     |             |             |             |
| H | -1.90041600 | -0.94509600 | -3.62505800 |                                     |             |             |             |
| H | -2.58280800 | 0.47153900  | -2.93407500 |                                     |             |             |             |
|   |             |             |             | <b><sup>5</sup>TS<sub>3-4</sub></b> |             |             |             |
|   |             |             |             | C                                   | 1.33547600  | 7.67773600  | 0.14048000  |
|   |             |             |             | C                                   | 0.45428100  | 6.69617400  | -0.57956800 |
|   |             |             |             | C                                   | -0.91211800 | 6.56514300  | -0.47731100 |
|   |             |             |             | C                                   | 0.86906200  | 5.74571100  | -1.58759700 |
|   |             |             |             | N                                   | -1.37062500 | 5.60176600  | -1.35163700 |
|   |             |             |             | C                                   | -0.30563900 | 5.08119500  | -2.04863100 |
|   |             |             |             | C                                   | 2.11425600  | 5.39827900  | -2.15276700 |
|   |             |             |             | C                                   | -0.26148500 | 4.09195300  | -3.04347300 |
|   |             |             |             | C                                   | 2.15985000  | 4.41711100  | -3.13958600 |
|   |             |             |             | C                                   | 0.98231000  | 3.77057000  | -3.58059100 |
|   |             |             |             | C                                   | 3.21523300  | 1.23135700  | 8.05320200  |
|   |             |             |             | C                                   | 2.41972900  | 2.04171200  | 7.01360600  |
|   |             |             |             | C                                   | 1.68382100  | 1.39013300  | 5.84805600  |
|   |             |             |             | O                                   | 1.62249300  | 2.01987800  | 4.78733200  |
|   |             |             |             | N                                   | 1.09446200  | 0.19013200  | 6.00684700  |
|   |             |             |             | C                                   | 6.88090700  | 2.72471800  | 4.73936100  |
|   |             |             |             | C                                   | 6.52345500  | 3.76393200  | 3.69807000  |
|   |             |             |             | C                                   | 6.73037100  | 3.53127900  | 2.32772700  |
|   |             |             |             | C                                   | 5.99453200  | 5.01227200  | 4.06454100  |
|   |             |             |             | C                                   | 6.42958100  | 4.49304900  | 1.36175400  |
|   |             |             |             | C                                   | 5.68601800  | 5.98633900  | 3.11188000  |
|   |             |             |             | C                                   | 5.90326400  | 5.73351700  | 1.74868800  |
|   |             |             |             | O                                   | 5.61901700  | 6.63551100  | 0.77243100  |
|   |             |             |             | C                                   | -4.33942500 | -7.38837900 | 1.39050700  |
|   |             |             |             | C                                   | -3.56320300 | -6.62774600 | 2.45410400  |
|   |             |             |             | C                                   | -2.58277300 | -5.62058400 | 1.95299100  |
|   |             |             |             | N                                   | -1.60505900 | -5.09297900 | 2.77470700  |
|   |             |             |             | C                                   | -2.49059600 | -4.91816000 | 0.78064100  |
|   |             |             |             | C                                   | -0.99041900 | -4.09453700 | 2.12098200  |
|   |             |             |             | N                                   | -1.49868100 | -3.96440900 | 0.90042800  |

|   |             |             |             |    |             |             |             |
|---|-------------|-------------|-------------|----|-------------|-------------|-------------|
| C | -5.74017200 | -1.18088900 | 1.33265400  | C  | 4.39884500  | -1.77911200 | -3.61641700 |
| C | -5.13716400 | -0.06760300 | 0.46593700  | O  | 0.13983200  | -2.10379300 | -1.44291100 |
| C | -3.79182100 | -0.30175500 | -0.23309600 | O  | 5.32045200  | -2.00404600 | -2.74616000 |
| O | -3.25707900 | -1.47150900 | -0.09035900 | O  | 4.56848100  | -1.90540200 | -4.83895900 |
| O | -3.28917600 | 0.60703400  | -0.89700400 | C  | -1.99213200 | -0.17784200 | 4.26064300  |
| C | -5.99061400 | 2.39045400  | -6.16827300 | N  | -0.16895600 | 2.46342400  | 2.60033500  |
| C | -5.38498300 | 1.15199700  | -5.48551400 | O  | -0.92789600 | -0.83153500 | 4.01066500  |
| C | -3.92724000 | 1.33334600  | -5.03577300 | C  | -1.92485500 | 1.36768800  | 3.98742300  |
| C | -3.17672900 | 0.01191100  | -4.83968400 | N  | 0.92281900  | 2.05799400  | 1.46927400  |
| O | -3.22068300 | -0.88018600 | -5.67435600 | O  | -3.05293700 | -0.60796000 | 4.72835200  |
| N | -2.39477900 | -0.06657300 | -3.72429200 | C  | -1.34684800 | 1.79515700  | 2.67692600  |
| C | -5.18288600 | -6.29331300 | 5.71256400  | C  | 1.83522900  | 3.22903100  | 1.44716300  |
| C | -4.79497800 | -4.81942400 | 5.55920900  | C  | 1.64370400  | 0.80637400  | 1.82778100  |
| C | -3.28012800 | -4.59874200 | 5.47075000  | C  | 0.20028600  | 1.90514100  | 0.18288100  |
| O | -2.49234300 | -5.54828600 | 5.35225500  | Fe | -1.41633600 | -2.17256200 | -0.18167200 |
| N | -2.84281700 | -3.32828200 | 5.50332900  | C  | 2.13375600  | -2.55705500 | -2.68124100 |
| C | -2.63073700 | -7.37660500 | -3.83968500 | H  | 1.41366000  | -2.74199800 | -3.48598900 |
| C | -2.53529200 | -6.01417200 | -4.55495300 | H  | 2.74058000  | -3.46841500 | -2.57405100 |
| C | -2.62217100 | -4.85538300 | -3.60297600 | H  | -7.41778100 | 7.11584400  | -4.69273300 |
| N | -3.73038000 | -4.03837000 | -3.48709300 | H  | -5.75481300 | 6.94940700  | -4.18348300 |
| C | -1.76137200 | -4.40442800 | -2.62797800 | H  | -6.63943600 | 5.53212900  | -4.72920600 |
| C | -3.51455400 | -3.15229900 | -2.48892600 | H  | -5.44058200 | 2.58749800  | -7.06489000 |
| N | -2.32870300 | -3.35204400 | -1.94367800 | H  | -7.01270900 | 2.19111800  | -6.41351500 |
| C | 6.55706800  | -5.01764200 | -1.58391800 | H  | -5.94967900 | 3.27991900  | -5.52914600 |
| N | 6.61878600  | -4.43860500 | -0.22925000 | H  | 3.82603600  | 1.96739800  | 8.53307600  |
| C | 5.53983400  | -3.83360000 | 0.32999000  | H  | 3.83894900  | 0.47208500  | 7.62940200  |
| N | 4.68724000  | -3.17596900 | -0.41865400 | H  | 2.57255000  | 0.76448900  | 8.81253100  |
| N | 5.37745700  | -3.91660600 | 1.67286700  | H  | -3.58423000 | -7.51265100 | -3.37357600 |
| C | 10.55990500 | -2.21840700 | -4.33430000 | H  | -1.86056500 | -7.43161600 | -3.09888400 |
| N | 9.36632800  | -2.75903700 | -4.97768000 | H  | -2.48284800 | -8.19720900 | -4.55567000 |
| C | 8.08967600  | -2.42582700 | -4.66104500 | H  | -4.90389900 | -6.77580800 | 0.71894100  |
| N | 7.81790900  | -1.67213700 | -3.59861600 | H  | -3.70509700 | -8.04227700 | 0.82937000  |
| N | 7.07326100  | -2.88256000 | -5.39240800 | H  | -5.07295300 | -8.03658100 | 1.89244200  |
| C | -6.71712100 | 6.48192900  | -4.18960000 | H  | -4.81168700 | -6.66837100 | 6.64377000  |
| C | -7.27663400 | 6.30897800  | -2.75810800 | H  | -6.23855300 | -6.45852300 | 5.65745600  |
| C | -6.33440000 | 5.79643200  | -1.68612800 | H  | -4.71605400 | -6.90436600 | 4.93436100  |
| C | -5.72667100 | 4.53039600  | -1.76628600 | H  | -6.53865900 | -0.76360900 | 1.91014000  |
| C | -6.07886400 | 6.55735100  | -0.53524400 | H  | -6.10780000 | -2.00499600 | 0.75834100  |
| C | -4.91114700 | 4.03631100  | -0.74762400 | H  | -4.99522100 | -1.56527700 | 2.03974000  |
| C | -5.27205700 | 6.07824800  | 0.50161000  | H  | 4.62869400  | -3.39375600 | 2.10774200  |
| C | -4.69016000 | 4.80780000  | 0.40465600  | H  | 5.74806300  | -4.70118400 | 2.19084800  |
| O | -3.90479800 | 4.27917100  | 1.38160400  | H  | 3.70733200  | -2.93564800 | -0.14815600 |
| C | 1.38901000  | -2.38074700 | -1.34512500 | H  | 4.97238600  | -2.78392900 | -1.35304200 |
| C | 3.03989300  | -1.34651300 | -3.05286200 | H  | 7.34841600  | -4.75275500 | 0.39587900  |

|   |             |             |             |           |             |             |             |
|---|-------------|-------------|-------------|-----------|-------------|-------------|-------------|
| H | 6.68232400  | -4.25890800 | -2.36148500 | H         | -4.22670100 | -2.39361800 | -2.18969800 |
| H | 7.33201600  | -5.78476300 | -1.67593100 | H         | -2.94794700 | 1.76010700  | 4.07073000  |
| H | 6.09100500  | -2.52524300 | -5.21698700 | H         | -1.34852400 | 1.80123300  | 4.82022800  |
| H | 7.23836200  | -3.51090800 | -6.16481700 | H         | -0.92560300 | -1.08974700 | 2.14789100  |
| H | 8.55301200  | -1.21728000 | -3.08196800 | H         | -1.97943500 | 1.78644900  | 1.79145700  |
| H | 6.82654900  | -1.69042900 | -3.22640800 | H         | 0.38719600  | 2.38812500  | 3.46578400  |
| H | 9.50503800  | -3.16220200 | -5.89524800 | H         | 2.10839100  | 0.94446900  | 2.80653700  |
| H | 11.39401200 | -2.90824600 | -4.50489300 | H         | 0.92248000  | -0.01609500 | 1.83607800  |
| H | 10.41999500 | -2.14188100 | -3.25008300 | H         | 2.40223100  | 0.61099400  | 1.06017700  |
| H | 5.31977000  | 7.46108900  | 1.16472100  | H         | -0.43293500 | 1.01705600  | 0.24390100  |
| H | 5.27435900  | 6.94673900  | 3.43256000  | H         | -0.39306600 | 2.80335700  | -0.00143800 |
| H | 6.60065500  | 4.30001400  | 0.30222200  | H         | 0.93601100  | 1.77783100  | -0.61727500 |
| H | 5.81850400  | 5.23712100  | 5.11873800  | H         | 2.61139000  | 3.06509000  | 0.69259100  |
| H | 7.14419700  | 2.57428500  | 2.00069000  | H         | 1.25648300  | 4.12148400  | 1.19805900  |
| H | 6.07197300  | 2.58809400  | 5.46970800  | H         | 2.29432600  | 3.33947800  | 2.43384600  |
| H | 7.77965500  | 3.02095300  | 5.30306900  | H         | -5.84292800 | 0.24382900  | -0.32083400 |
| H | -7.66596400 | 7.28203200  | -2.42352900 | H         | -4.98717800 | 0.83517400  | 1.07588200  |
| H | -8.15760100 | 5.64610500  | -2.80272000 | H         | -5.99735700 | 0.85623200  | -4.61717800 |
| H | -6.53149800 | 7.54580400  | -0.43003300 | H         | -5.42007700 | 0.30833400  | -6.19055200 |
| H | -5.90835700 | 3.90011600  | -2.63720000 | H         | -3.36394400 | 1.86182300  | -5.82356200 |
| H | -4.45928400 | 3.04709000  | -0.81902300 | H         | -3.86591600 | 1.96086200  | -4.13638400 |
| H | -5.10791700 | 6.69243500  | 1.39096700  | H         | -1.90317800 | -0.94025400 | -3.58297300 |
| H | -3.86449000 | 4.87908500  | 2.13187400  | H         | -2.60133000 | 0.45661400  | -2.87520800 |
| H | 1.04563700  | 3.00877300  | -4.35958500 | H         | 2.52803800  | -0.71411300 | -3.78850600 |
| H | 3.11702900  | 4.14757600  | -3.58992400 | H         | 3.23930300  | -0.73568800 | -2.16216000 |
| H | -1.16715000 | 3.59338800  | -3.38695200 | O         | 2.01032800  | -2.52757100 | -0.28205200 |
| H | 3.03023700  | 5.89202600  | -1.82426400 | H         | 10.80530400 | -1.26397400 | -4.75105500 |
| H | -1.60910200 | 7.10731400  | 0.15496300  | H         | 5.58638900  | -5.46133000 | -1.65977500 |
| H | -2.33581700 | 5.31803800  | -1.44461800 | H         | 1.84337700  | 8.28603000  | -0.57856000 |
| H | 2.09780100  | 7.17519100  | 0.75371700  | H         | 7.08227100  | 1.77766600  | 4.28369700  |
| H | 0.75168700  | 8.33467500  | 0.79803300  | H         | 1.66415900  | 2.65333500  | 7.53560900  |
| H | -5.23872800 | -4.37985200 | 4.64980400  | H         | 3.08557500  | 2.76522500  | 6.52724900  |
| H | -5.19090300 | -4.21753100 | 6.39193300  | H         | 1.07688300  | -0.26430300 | 6.90850400  |
| H | -1.85469500 | -3.16601300 | 5.35114200  | H         | 0.48215200  | -0.18412200 | 5.26324200  |
| H | -3.38910500 | -2.47491900 | 5.36325800  | O         | -0.71888700 | -1.19442600 | 1.19377200  |
| H | -4.27231200 | -6.09312300 | 3.09970600  |           |             |             |             |
| H | -3.04353600 | -7.33796700 | 3.11257200  | <b>54</b> |             |             |             |
| H | -3.08336400 | -5.01204600 | -0.11957100 | C         | 1.54974400  | 7.69383900  | -0.06674900 |
| H | -1.55206000 | -5.31560200 | 3.78187400  | C         | 0.59267300  | 6.76744100  | -0.76330900 |
| H | -0.22289000 | -3.45984900 | 2.54762500  | C         | -0.78316000 | 6.82296000  | -0.75540700 |
| H | -1.58112500 | -5.95174600 | -5.09911200 | C         | 0.93917100  | 5.69369500  | -1.66748000 |
| H | -3.32111400 | -5.92170400 | -5.31914900 | N         | -1.30947500 | 5.86163800  | -1.59377200 |
| H | -4.52847300 | -4.03171700 | -4.10896000 | C         | -0.28205500 | 5.15297700  | -2.16863700 |
| H | -0.77755000 | -4.78290500 | -2.37448500 | C         | 2.15877500  | 5.13573800  | -2.10460600 |

|   |             |             |             |    |             |             |             |
|---|-------------|-------------|-------------|----|-------------|-------------|-------------|
| C | -0.30618700 | 4.08305500  | -3.07743900 | N  | 9.35993800  | -3.09911800 | -4.94920100 |
| C | 2.13848600  | 4.07264300  | -3.00417100 | C  | 8.07197100  | -2.77534800 | -4.67517800 |
| C | 0.91562500  | 3.55153200  | -3.48579700 | N  | 7.76518500  | -1.97242000 | -3.65940400 |
| C | 3.25597100  | 1.39837300  | 8.00521800  | N  | 7.08029400  | -3.29265200 | -5.39986600 |
| C | 2.46326700  | 2.09125600  | 6.88568200  | C  | -6.52464800 | 6.59510500  | -4.38185800 |
| C | 1.52227900  | 1.21564600  | 6.05700100  | C  | -7.08197500 | 6.46920800  | -2.94396200 |
| O | 1.49385200  | 1.31529500  | 4.82380600  | C  | -6.15804700 | 5.94971200  | -1.85656900 |
| N | 0.72202700  | 0.37547200  | 6.73173900  | C  | -5.54443200 | 4.68545200  | -1.92880000 |
| C | -4.50471100 | -7.18949600 | 1.54106100  | C  | -5.93844300 | 6.69822400  | -0.68948100 |
| C | -3.69697200 | -6.37775100 | 2.55285200  | C  | -4.76159100 | 4.18068900  | -0.88859200 |
| C | -2.76233600 | -5.33314800 | 2.02050300  | C  | -5.16302900 | 6.20951100  | 0.36739000  |
| N | -1.95519500 | -4.61717100 | 2.88552300  | C  | -4.57698000 | 4.94029400  | 0.27763400  |
| C | -2.56140300 | -4.76630000 | 0.78661800  | O  | -3.82160100 | 4.40535200  | 1.27910500  |
| C | -1.32792200 | -3.65735400 | 2.19383200  | C  | 1.36118400  | -2.60227000 | -1.42178300 |
| N | -1.66536200 | -3.71784500 | 0.90806700  | C  | 2.95448500  | -1.72610200 | -3.25691500 |
| C | -5.74845700 | -0.95202700 | 1.32839600  | C  | 4.34622900  | -2.13616200 | -3.74897000 |
| C | -5.14803200 | 0.11902700  | 0.40486300  | O  | 0.11359500  | -2.36548000 | -1.59151200 |
| C | -3.83105300 | -0.16686800 | -0.33205200 | O  | 5.24775500  | -2.25988100 | -2.83873600 |
| O | -3.30443800 | -1.33226800 | -0.14857400 | O  | 4.55715000  | -2.33829900 | -4.95494600 |
| O | -3.34859600 | 0.70505300  | -1.05893100 | C  | -2.62415000 | 0.08880500  | 5.66206700  |
| C | -5.89888000 | 2.43930600  | -6.25825600 | N  | -0.93946000 | 0.71732200  | 2.95903700  |
| C | -5.31980300 | 1.19898600  | -5.55649300 | O  | -1.63725700 | -0.69023400 | 5.81264900  |
| C | -3.85000400 | 1.35080500  | -5.13359600 | C  | -2.27751000 | 1.43881800  | 4.91611300  |
| C | -3.12710400 | 0.01290600  | -4.94524600 | N  | 0.93796300  | 2.15660600  | 1.13612300  |
| O | -3.16178900 | -0.85825000 | -5.80136300 | O  | -3.80183300 | -0.09134500 | 5.98772800  |
| N | -2.38440400 | -0.10534900 | -3.80652900 | C  | -2.03486600 | 1.12185700  | 3.47794700  |
| C | -5.32601200 | -5.96778900 | 5.83333200  | C  | 1.23346800  | 3.14929400  | 2.14049500  |
| C | -5.02928900 | -4.47103500 | 5.72689900  | C  | 1.80940900  | 1.01894700  | 0.97973700  |
| C | -3.55120800 | -4.11232700 | 5.84575300  | C  | -0.13483400 | 2.32395600  | 0.18854700  |
| O | -2.66986400 | -4.90158500 | 5.46271800  | Fe | -1.46929100 | -2.07862000 | -0.36452100 |
| N | -3.28012600 | -2.90854600 | 6.35260000  | C  | 2.14622400  | -2.93551700 | -2.70313400 |
| C | -2.78934100 | -7.34910300 | -3.68451000 | H  | 1.46171400  | -3.30099600 | -3.47680500 |
| C | -2.68629300 | -6.02901700 | -4.47126900 | H  | 2.82414000  | -3.76302600 | -2.44992300 |
| C | -2.78718600 | -4.82279700 | -3.58668800 | H  | -7.20844100 | 7.23390700  | -4.90173300 |
| N | -3.94603100 | -4.09194000 | -3.39591800 | H  | -5.55087100 | 7.03822200  | -4.38532700 |
| C | -1.87794700 | -4.25587600 | -2.72786100 | H  | -6.47099800 | 5.63162500  | -4.89968400 |
| C | -3.71000700 | -3.13875700 | -2.46674700 | H  | -5.34286500 | 2.60037800  | -7.15836700 |
| N | -2.46248400 | -3.21583300 | -2.03928500 | H  | -6.92534400 | 2.25979300  | -6.50053400 |
| C | 6.45200800  | -5.16745200 | -1.46937600 | H  | -5.83404900 | 3.34023200  | -5.63762800 |
| N | 6.52032200  | -4.53420600 | -0.14016100 | H  | 3.88451900  | 2.13031200  | 8.46807700  |
| C | 5.45795600  | -3.87137900 | 0.38121300  | H  | 3.86087700  | 0.61339400  | 7.60137400  |
| N | 4.62652700  | -3.22798000 | -0.40368400 | H  | 2.61179400  | 0.97572500  | 8.78840500  |
| N | 5.28999500  | -3.87513700 | 1.72637800  | H  | -3.74657400 | -7.44963900 | -3.21706500 |
| C | 10.52777500 | -2.53818900 | -4.27973900 | H  | -2.02177900 | -7.40528600 | -2.94109100 |

|   |             |             |             |   |             |             |             |
|---|-------------|-------------|-------------|---|-------------|-------------|-------------|
| H | -2.66313400 | -8.20417400 | -4.36429600 | H | -3.12932700 | -7.05909100 | 3.20419900  |
| H | -5.05268200 | -6.57958900 | 0.85359900  | H | -3.00940100 | -5.02507100 | -0.16416500 |
| H | -3.88632200 | -7.87272900 | 0.99735500  | H | -1.99378500 | -4.72336200 | 3.92205000  |
| H | -5.24066700 | -7.79792300 | 2.08469100  | H | -0.66506000 | -2.91982500 | 2.63282400  |
| H | -4.96564400 | -6.32910300 | 6.77418500  | H | -1.72563400 | -5.98877300 | -5.00457000 |
| H | -6.38545500 | -6.10769000 | 5.78026300  | H | -3.46296200 | -5.98501300 | -5.24914600 |
| H | -4.84052400 | -6.55112200 | 5.04784800  | H | -4.80550700 | -4.19654400 | -3.91956100 |
| H | -6.53696000 | -0.50072400 | 1.89392400  | H | -0.84413700 | -4.53042100 | -2.56076200 |
| H | -6.13599900 | -1.78046000 | 0.77373800  | H | -4.44984700 | -2.42222600 | -2.13202300 |
| H | -5.00220800 | -1.33247000 | 2.03707700  | H | -3.10979100 | 2.14027000  | 5.02328100  |
| H | 4.54175800  | -3.32283100 | 2.12497100  | H | -1.37492100 | 1.86571300  | 5.37269200  |
| H | 5.63043100  | -4.64580400 | 2.28484400  | H | -0.88991700 | -0.32931400 | 1.49448300  |
| H | 3.64417100  | -2.96741600 | -0.15575100 | H | -2.90831400 | 1.18188400  | 2.81541800  |
| H | 4.90983800  | -2.91624800 | -1.36677800 | H | -0.18411800 | 0.68061600  | 3.65772400  |
| H | 7.23896000  | -4.83737000 | 0.50291900  | H | 2.50831400  | 0.95908100  | 1.81643100  |
| H | 6.60451700  | -4.44601000 | -2.27685200 | H | 1.18170800  | 0.11063900  | 0.90382900  |
| H | 7.20663700  | -5.95805800 | -1.52247000 | H | 2.35852400  | 1.12266600  | 0.03095500  |
| H | 6.08882700  | -2.94133500 | -5.26766000 | H | -0.55666800 | 1.34037300  | -0.04763200 |
| H | 7.27219300  | -3.97346300 | -6.11980000 | H | -0.90154400 | 2.98890200  | 0.58845200  |
| H | 8.47376700  | -1.44229000 | -3.17814300 | H | 0.27382900  | 2.76582700  | -0.73800400 |
| H | 6.76494000  | -1.97688600 | -3.31347200 | H | 2.18954800  | 3.63592500  | 1.88539300  |
| H | 9.52890000  | -3.53902300 | -5.84444100 | H | 0.44104700  | 3.89961700  | 2.17813200  |
| H | 11.36540700 | -3.23651400 | -4.38870000 | H | 1.35478600  | 2.65460500  | 3.11896900  |
| H | 10.34249900 | -2.42000700 | -3.20613600 | H | -5.87427000 | 0.40826000  | -0.37162200 |
| H | -7.44013400 | 7.46088600  | -2.62985300 | H | -4.96916800 | 1.04669500  | 0.96708500  |
| H | -7.98401400 | 5.83393900  | -2.97133500 | H | -5.92610100 | 0.93687200  | -4.67328600 |
| H | -6.39619900 | 7.68461800  | -0.58675100 | H | -5.38817300 | 0.34361700  | -6.24502100 |
| H | -5.69789000 | 4.06175300  | -2.80962200 | H | -3.29060200 | 1.86181700  | -5.93517600 |
| H | -4.31438500 | 3.18894900  | -0.95653000 | H | -3.76076400 | 1.97990900  | -4.23818000 |
| H | -5.02688100 | 6.81577900  | 1.26689100  | H | -1.92862500 | -0.99878300 | -3.66661500 |
| H | -3.87032700 | 4.96930100  | 2.05722100  | H | -2.61099800 | 0.40970600  | -2.95608200 |
| H | 0.92446400  | 2.72086900  | -4.19336600 | H | 2.40273900  | -1.25224700 | -4.07753500 |
| H | 3.07812100  | 3.63814200  | -3.34827800 | H | 3.09867900  | -0.97513900 | -2.46847000 |
| H | -1.24564300 | 3.67879600  | -3.45187300 | O | 1.95765600  | -2.58865800 | -0.33408500 |
| H | 3.10920400  | 5.53405400  | -1.74552300 | H | 10.79770100 | -1.60075000 | -4.71927900 |
| H | -1.44171400 | 7.49834700  | -0.21635100 | H | 5.47055600  | -5.58830100 | -1.53622300 |
| H | -2.29534900 | 5.68409300  | -1.72496200 | H | 2.07384200  | 8.27125800  | -0.79948500 |
| H | 2.29459800  | 7.14772500  | 0.53142300  | H | 1.85166400  | 2.90648900  | 7.30822100  |
| H | 1.02415100  | 8.38678000  | 0.60274700  | H | 3.15457800  | 2.56108000  | 6.17378500  |
| H | -5.36822200 | -4.07165700 | 4.75487400  | H | 0.71622400  | 0.38818500  | 7.74143800  |
| H | -5.60348100 | -3.91836400 | 6.48530000  | H | -0.08891000 | -0.09288700 | 6.26918700  |
| H | -2.35782800 | -2.47428600 | 6.24749700  | O | -0.62587800 | -0.87539700 | 0.70886900  |
| H | -3.99291900 | -2.19074600 | 6.47083200  | C | 6.79906900  | 1.26115600  | 3.06727600  |
| H | -4.39166500 | -5.85191700 | 3.22044700  | C | 6.70981100  | 1.84471100  | 1.67385100  |

|   |            |             |             |   |             |             |             |
|---|------------|-------------|-------------|---|-------------|-------------|-------------|
| C | 6.39450200 | 1.05191600  | 0.55780300  | C | -1.17410900 | -3.83220300 | 2.15951000  |
| C | 6.93877400 | 3.21197100  | 1.44451400  | N | -1.58255400 | -3.84450400 | 0.89214600  |
| C | 6.30821200 | 1.58695100  | -0.72936900 | C | -5.74845700 | -0.95202500 | 1.32838500  |
| C | 6.85839700 | 3.76500200  | 0.16425800  | C | -5.10737900 | 0.08569200  | 0.39858100  |
| C | 6.54179800 | 2.95352900  | -0.93684800 | C | -3.83142600 | -0.30984800 | -0.35026500 |
| O | 6.44731500 | 3.42815100  | -2.20631600 | O | -3.31019200 | -1.45698700 | -0.02951500 |
| H | 6.63166900 | 4.37216600  | -2.22029900 | O | -3.34116300 | 0.43738100  | -1.19521000 |
| H | 7.04608600 | 4.83231900  | 0.02195700  | C | -5.89887900 | 2.43930400  | -6.25826000 |
| H | 6.05327900 | 0.95642400  | -1.58108500 | C | -5.31713700 | 1.18866200  | -5.57581400 |
| H | 7.19037200 | 3.86700000  | 2.28163400  | C | -3.81932200 | 1.30063700  | -5.24834300 |
| H | 6.20640400 | -0.01499900 | 0.69234400  | C | -3.11937300 | -0.05195400 | -5.08913300 |
| H | 6.04429300 | 1.69949800  | 3.73800900  | O | -3.20941300 | -0.92587600 | -5.93813700 |
| H | 7.78335100 | 1.44996500  | 3.52122500  | N | -2.32282600 | -0.18049700 | -3.98573300 |
| H | 6.64093200 | 0.17451800  | 3.05954800  | C | -5.32601100 | -5.96779500 | 5.83331600  |
|   |            |             |             | C | -5.02064500 | -4.47466100 | 5.66808000  |
|   |            |             |             | C | -3.53984300 | -4.11473300 | 5.52819400  |
|   |            |             |             | O | -2.66650800 | -4.99296000 | 5.42104000  |
|   |            |             |             | N | -3.25692400 | -2.80856700 | 5.48637200  |
|   |            |             |             | C | -2.78934200 | -7.34911700 | -3.68452200 |
|   |            |             |             | C | -2.67332600 | -6.03358000 | -4.47599300 |
|   |            |             |             | C | -2.75029600 | -4.82473200 | -3.59190400 |
|   |            |             |             | N | -3.85649700 | -4.00101800 | -3.49919800 |
|   |            |             |             | C | -1.87641600 | -4.33447400 | -2.65148300 |
|   |            |             |             | C | -3.63074200 | -3.07388400 | -2.54325200 |
|   |            |             |             | N | -2.43667000 | -3.25378300 | -2.00669500 |
|   |            |             |             | C | 6.45198700  | -5.16742500 | -1.46938500 |
|   |            |             |             | N | 6.53298800  | -4.55135400 | -0.13410700 |
|   |            |             |             | C | 5.48928300  | -3.87914600 | 0.40802600  |
|   |            |             |             | N | 4.63140900  | -3.25438000 | -0.36491600 |
|   |            |             |             | N | 5.36482800  | -3.85719400 | 1.75713800  |
|   |            |             |             | C | 10.52791100 | -2.53823100 | -4.27971100 |
|   |            |             |             | N | 9.35309200  | -3.09107600 | -4.94598100 |
|   |            |             |             | C | 8.06636000  | -2.78803200 | -4.64618800 |
|   |            |             |             | N | 7.76746100  | -1.97778000 | -3.63417700 |
|   |            |             |             | N | 7.06764600  | -3.33934200 | -5.33696700 |
|   |            |             |             | C | -6.52464900 | 6.59510500  | -4.38185900 |
|   |            |             |             | C | -7.01756100 | 6.43951800  | -2.92541600 |
|   |            |             |             | C | -6.05048700 | 5.79552300  | -1.94224400 |
|   |            |             |             | C | -5.35408700 | 4.61505600  | -2.25476100 |
|   |            |             |             | C | -5.85219100 | 6.32202500  | -0.65431300 |
|   |            |             |             | C | -4.50837500 | 3.99277300  | -1.33812800 |
|   |            |             |             | C | -5.00765800 | 5.71155000  | 0.28353900  |
|   |            |             |             | C | -4.32298500 | 4.53041800  | -0.05002900 |
|   |            |             |             | O | -3.47457300 | 3.87414500  | 0.76411000  |

54<sub>2</sub>



|    |             |             |             |   |             |             |             |
|----|-------------|-------------|-------------|---|-------------|-------------|-------------|
| C  | 1.35243900  | -2.49880600 | -1.35092700 | H | 4.89442000  | -2.94702100 | -1.33868200 |
| C  | 2.97529300  | -1.67358600 | -3.19075900 | H | 7.28279500  | -4.82777700 | 0.48477100  |
| C  | 4.34392700  | -2.14421000 | -3.69948600 | H | 6.59691500  | -4.43643100 | -2.26976200 |
| O  | 0.10454500  | -2.22312800 | -1.49980800 | H | 7.20543000  | -5.95817700 | -1.53719800 |
| O  | 5.24401200  | -2.32344500 | -2.79834400 | H | 6.07979000  | -2.98099000 | -5.21180500 |
| O  | 4.53995800  | -2.33535200 | -4.90954400 | H | 7.25237000  | -4.05220400 | -6.02727500 |
| C  | -2.60876600 | 0.33075800  | 4.97844200  | H | 8.44403100  | -1.34211900 | -3.24195200 |
| N  | -2.89300700 | 3.75255300  | 3.46292200  | H | 6.77427100  | -1.98184100 | -3.28339400 |
| O  | -1.56647900 | -0.38125300 | 5.00738800  | H | 9.51236400  | -3.52897100 | -5.84402100 |
| C  | -2.41553000 | 1.88266200  | 5.05009900  | H | 11.36222500 | -3.23969400 | -4.39335800 |
| N  | 1.00630600  | 2.04003000  | 1.30591000  | H | 10.34139500 | -2.41848200 | -3.20661500 |
| O  | -3.79051000 | -0.05426500 | 4.91829500  | H | -3.70660500 | 8.72768800  | 7.74267100  |
| C  | -3.17086200 | 2.61620000  | 3.97778000  | H | -5.10761200 | 7.91862700  | 6.08202500  |
| C  | 1.40395200  | 3.19852400  | 2.06908000  | H | -3.52520500 | 5.60224300  | 9.35167800  |
| C  | 1.76430200  | 0.81769200  | 1.43988800  | H | -6.32764100 | 5.93949200  | 5.26386900  |
| C  | -0.05256000 | 2.10537200  | 0.33462100  | H | -4.75757800 | 3.61199600  | 8.53068000  |
| Fe | -1.49134600 | -2.15393100 | -0.30647400 | H | -5.70065600 | 2.70959900  | 5.77730600  |
| C  | 2.10934800  | -2.84581200 | -2.64389600 | H | -7.18109700 | 3.66648400  | 5.62901100  |
| H  | 1.40073900  | -3.16842800 | -3.41474900 | H | -7.28516100 | 7.43541700  | -2.54060100 |
| H  | 2.74610500  | -3.70974700 | -2.40489300 | H | -7.96132600 | 5.86609500  | -2.92490300 |
| H  | -7.20844100 | 7.23390700  | -4.90173300 | H | -6.37404500 | 7.23710500  | -0.36304200 |
| H  | -5.55087100 | 7.03822300  | -4.38532600 | H | -5.48687500 | 4.15271200  | -3.23217100 |
| H  | -6.47495300 | 5.63786600  | -4.91291600 | H | -4.01241700 | 3.05348900  | -1.57732000 |
| H  | -5.34286300 | 2.60037800  | -7.15836600 | H | -4.88425900 | 6.15175400  | 1.27511600  |
| H  | -6.92534500 | 2.25979400  | -6.50053000 | H | -3.47565800 | 4.12617200  | 1.71767600  |
| H  | -5.82865400 | 3.33531400  | -5.63251300 | H | 1.35082600  | 2.36830900  | -3.78484500 |
| H  | 3.88451500  | 2.13030700  | 8.46809100  | H | 3.41550800  | 3.42126200  | -2.88207400 |
| H  | 3.86087600  | 0.61339000  | 7.60138100  | H | -0.89019500 | 3.31904900  | -3.27995200 |
| H  | 2.58978300  | 0.97203400  | 8.76697800  | H | 3.28862800  | 5.45419300  | -1.46027900 |
| H  | -3.74657100 | -7.44963300 | -3.21705900 | H | -1.41437200 | 7.37742400  | -0.39845500 |
| H  | -2.02178100 | -7.40527500 | -2.94108800 | H | -2.11062600 | 5.40666100  | -1.77848000 |
| H  | -2.66325500 | -8.20654700 | -4.36129400 | H | 2.29660600  | 7.21951200  | 0.58719400  |
| H  | -5.05269600 | -6.57959700 | 0.85360300  | H | 0.95633200  | 8.38273000  | 0.54819900  |
| H  | -3.88632600 | -7.87273600 | 0.99735900  | H | -5.52812900 | -4.07347300 | 4.77439400  |
| H  | -5.24745800 | -7.80078400 | 2.07293700  | H | -5.43928600 | -3.90402800 | 6.51197500  |
| H  | -4.96564800 | -6.32910100 | 6.77418700  | H | -2.30946100 | -2.45978200 | 5.35050300  |
| H  | -6.38545600 | -6.10768900 | 5.78027600  | H | -3.93374700 | -2.04519700 | 5.42779800  |
| H  | -4.85576500 | -6.57299200 | 5.05398500  | H | -4.39270300 | -5.83465200 | 3.20445600  |
| H  | -6.53695800 | -0.50072800 | 1.89393000  | H | -3.17803400 | -7.09291100 | 3.24263200  |
| H  | -6.13600900 | -1.78045900 | 0.77374400  | H | -3.06009200 | -5.04015500 | -0.13142200 |
| H  | -5.01453000 | -1.33612200 | 2.04590000  | H | -1.83870700 | -4.87944000 | 3.90050000  |
| H  | 4.64371500  | -3.28450800 | 2.17526700  | H | -0.45157500 | -3.13725000 | 2.57309100  |
| H  | 5.74141000  | -4.60403600 | 2.32423100  | H | -1.71690400 | -6.01229000 | -5.01884900 |
| H  | 3.67294400  | -2.96635300 | -0.08240900 | H | -3.45599000 | -5.97828100 | -5.24658700 |

|   |             |             |             |                                |             |             |             |
|---|-------------|-------------|-------------|--------------------------------|-------------|-------------|-------------|
| H | -4.66624100 | -4.02649200 | -4.10581200 | O                              | 7.57865000  | 1.58016400  | -2.13043700 |
| H | -0.88952500 | -4.70021200 | -2.39340400 | H                              | 7.81996600  | 2.37152600  | -2.62162500 |
| H | -4.33867000 | -2.29917100 | -2.27686300 | H                              | 7.79130900  | 4.01689100  | -0.98881400 |
| H | -2.83528900 | 2.18905100  | 6.02246800  | H                              | 6.66891800  | -0.09907100 | -0.39128800 |
| H | -1.35639400 | 2.17329800  | 5.04448600  | H                              | 7.24527200  | 4.51174700  | 1.36110400  |
| H | -1.36868900 | -0.70715700 | 1.66493800  | H                              | 6.14053300  | 0.39514200  | 1.98251700  |
| H | -4.06187800 | 2.09872400  | 3.59998000  | H                              | 5.45123800  | 2.25687800  | 3.66126900  |
| H | -2.06133600 | 4.16765600  | 3.89503700  | H                              | 6.19719500  | 3.85805400  | 3.49259200  |
| H | 2.24687500  | 0.79721500  | 2.42100800  | H                              | 7.18380000  | 2.46677700  | 3.96763900  |
| H | 1.08013000  | -0.03448400 | 1.30624000  |                                |             |             |             |
| H | 2.51991800  | 0.78392500  | 0.63695600  |                                |             |             |             |
| H | -0.49805700 | 1.11010100  | 0.22342700  |                                |             |             |             |
| H | -0.80162200 | 2.84607800  | 0.62347400  |                                |             |             |             |
| H | 0.37419300  | 2.41304900  | -0.64063500 |                                |             |             |             |
| H | 2.38335600  | 3.54512600  | 1.70133100  |                                |             |             |             |
| H | 0.67103700  | 3.99988900  | 1.95636700  |                                |             |             |             |
| H | 1.52998100  | 2.89624200  | 3.12076000  |                                |             |             |             |
| H | -5.82074400 | 0.43605800  | -0.36296800 |                                |             |             |             |
| H | -4.83543500 | 0.99052000  | 0.95955700  |                                |             |             |             |
| H | -5.87564000 | 0.95299500  | -4.65495100 |                                |             |             |             |
| H | -5.45205100 | 0.33073800  | -6.25137600 |                                |             |             |             |
| H | -3.29790200 | 1.78389500  | -6.09155600 |                                |             |             |             |
| H | -3.65300400 | 1.93921900  | -4.37176200 |                                |             |             |             |
| H | -1.87480500 | -1.08062100 | -3.86728100 |                                |             |             |             |
| H | -2.53686400 | 0.31059200  | -3.11991600 |                                |             |             |             |
| H | 2.44182800  | -1.16424900 | -4.00220300 |                                |             |             |             |
| H | 3.16434000  | -0.93842600 | -2.39648400 |                                |             |             |             |
| O | 1.95563500  | -2.50942700 | -0.27017200 |                                |             |             |             |
| H | 10.79758600 | -1.60072700 | -4.71930100 |                                |             |             |             |
| H | 5.47056700  | -5.58832700 | -1.53622300 |                                |             |             |             |
| H | 2.07382700  | 8.27123700  | -0.79951200 |                                |             |             |             |
| H | -6.79966700 | 2.82851200  | 7.12211300  |                                |             |             |             |
| H | 1.80421700  | 2.87631000  | 7.35471400  |                                |             |             |             |
| H | 3.21150100  | 2.73767900  | 6.30266500  |                                |             |             |             |
| H | 0.49621900  | 0.57721800  | 7.34552800  |                                |             |             |             |
| H | -0.01351300 | 0.14507500  | 5.73879000  |                                |             |             |             |
| O | -0.76284600 | -0.98774700 | 0.96854800  |                                |             |             |             |
| C | 6.35165800  | 2.78499000  | 3.31963100  |                                |             |             |             |
| C | 6.65302700  | 2.49355300  | 1.86600100  |                                |             |             |             |
| C | 6.50504800  | 1.19805100  | 1.33738100  |                                |             |             |             |
| C | 7.11666900  | 3.49106800  | 0.99482900  |                                |             |             |             |
| C | 6.80751600  | 0.90517600  | 0.00744000  |                                |             |             |             |
| C | 7.42889800  | 3.21510600  | -0.34036600 |                                |             |             |             |
| C | 7.28030700  | 1.91578500  | -0.84252800 |                                |             |             |             |
|   |             |             |             | <sup>5</sup> TS <sub>4-5</sub> |             |             |             |
|   |             |             |             | C                              | 1.68174200  | -2.36191100 | -7.27178400 |
|   |             |             |             | C                              | 1.90163400  | -1.04270500 | -6.58631600 |
|   |             |             |             | C                              | 3.06388300  | -0.55686900 | -6.01406300 |
|   |             |             |             | C                              | 0.93521100  | 0.02517300  | -6.47856500 |
|   |             |             |             | N                              | 2.87871500  | 0.73080700  | -5.57401700 |
|   |             |             |             | C                              | 1.58521100  | 1.12128900  | -5.84131700 |
|   |             |             |             | C                              | -0.41148400 | 0.16725700  | -6.87235600 |
|   |             |             |             | C                              | 0.93391800  | 2.33789300  | -5.60296800 |
|   |             |             |             | C                              | -1.06579800 | 1.37392500  | -6.63043000 |
|   |             |             |             | C                              | -0.39845500 | 2.44861200  | -6.00542800 |
|   |             |             |             | C                              | 0.45957000  | -8.40242500 | 1.08019200  |
|   |             |             |             | C                              | 0.99466500  | -7.23690300 | 0.23074200  |
|   |             |             |             | C                              | 0.92419000  | -5.87911900 | 0.93617400  |
|   |             |             |             | O                              | -0.08940200 | -5.18831000 | 0.88194600  |
|   |             |             |             | N                              | 2.03682100  | -5.53107300 | 1.62121300  |
|   |             |             |             | C                              | 0.50445500  | 2.94435500  | 7.93461400  |
|   |             |             |             | C                              | 0.57650700  | 1.50488000  | 7.42710600  |
|   |             |             |             | C                              | 0.05766300  | 1.24326300  | 6.04588500  |
|   |             |             |             | N                              | 0.02528500  | -0.04301300 | 5.53644100  |
|   |             |             |             | C                              | -0.32386300 | 2.05308200  | 5.00635900  |
|   |             |             |             | C                              | -0.32704700 | 0.01446100  | 4.24596400  |
|   |             |             |             | N                              | -0.55847200 | 1.27460900  | 3.88600300  |
|   |             |             |             | C                              | 4.31721900  | 1.85570300  | 2.44209400  |
|   |             |             |             | C                              | 3.77119000  | 2.53283500  | 1.17861400  |
|   |             |             |             | C                              | 2.25229400  | 2.47792000  | 0.94169300  |
|   |             |             |             | O                              | 1.52659900  | 2.36680500  | 2.01780000  |
|   |             |             |             | O                              | 1.78094300  | 2.57564900  | -0.18419800 |
|   |             |             |             | C                              | 3.07520800  | 7.80520300  | -3.25731600 |

|   |              |             |             |    |              |             |             |
|---|--------------|-------------|-------------|----|--------------|-------------|-------------|
| C | 2.31519100   | 7.22513400  | -2.05253200 | O  | 2.95030300   | -3.11433500 | 2.75190500  |
| C | 1.12342300   | 6.34813300  | -2.44566600 | C  | 4.70701600   | -3.13725600 | 1.09221900  |
| C | 0.19798600   | 6.00159500  | -1.27698900 | N  | -0.16367400  | -1.14005000 | -0.92611800 |
| O | 0.22780600   | 6.59356600  | -0.20979700 | O  | 4.85435000   | -2.00327600 | 3.17951300  |
| N | -0.72298900  | 5.02645500  | -1.54224400 | C  | 5.13175300   | -1.96509300 | 0.26070300  |
| C | 3.31329900   | -0.47817600 | 8.93042800  | C  | -0.50736000  | -0.27856400 | -2.06082300 |
| C | 3.72539400   | -0.84663900 | 7.49995100  | C  | 1.21754700   | -1.63284500 | -0.97737800 |
| C | 2.68738700   | -1.60244600 | 6.67174700  | C  | -1.13976800  | -2.21015600 | -0.69707400 |
| O | 1.51048800   | -1.71472800 | 7.05596400  | Fe | -0.37542100  | 1.87990200  | 1.90233900  |
| N | 3.11753400   | -2.08444500 | 5.50212700  | C  | -4.53945900  | 2.09056600  | 0.60016600  |
| C | -2.89875500  | 6.42914100  | 5.37547300  | H  | -4.45862400  | 3.17385500  | 0.74541800  |
| C | -2.68571000  | 6.71990900  | 3.87923200  | H  | -5.35571200  | 1.73457700  | 1.24420200  |
| C | -1.73299900  | 5.75584100  | 3.24033900  | H  | 6.79798700   | 6.20669400  | -6.43934100 |
| N | -0.39673100  | 6.02067600  | 2.99946100  | H  | 5.55471600   | 4.98260400  | -6.52245000 |
| C | -1.89636500  | 4.44156000  | 2.88419200  | H  | 5.48563400   | 6.22387200  | -5.27303800 |
| C | 0.18756200   | 4.90988900  | 2.51036200  | H  | 2.36184200   | 8.22801300  | -3.93385600 |
| N | -0.69685300  | 3.92945700  | 2.43696100  | H  | 3.73846400   | 8.57139800  | -2.91428900 |
| C | -8.60637900  | -0.62988200 | 1.81667700  | H  | 3.65238900   | 7.04637100  | -3.79641600 |
| N | -7.88204700  | -1.91074800 | 1.80877900  | H  | 0.44514400   | -9.27958100 | 0.46490600  |
| C | -6.52961100  | -1.97300400 | 1.78302000  | H  | -0.53804300  | -8.18970400 | 1.40970800  |
| N | -5.83948700  | -1.00871800 | 1.21214600  | H  | 1.08753000   | -8.59350600 | 1.96079000  |
| N | -5.91491700  | -3.02865300 | 2.35651800  | H  | -1.99304800  | 6.55434200  | 5.93119300  |
| C | -11.77862300 | -1.00954200 | -2.78978900 | H  | -3.27237200  | 5.43708100  | 5.52107800  |
| N | -11.31138600 | 0.26782900  | -2.26304700 | H  | -3.63759700  | 7.12880000  | 5.79266800  |
| C | -10.01353500 | 0.60655400  | -2.06052200 | H  | 0.96896200   | 3.64630100  | 7.27389000  |
| N | -9.03678200  | -0.28746500 | -2.17934100 | H  | -0.50695800  | 3.24189700  | 8.11717200  |
| N | -9.69860600  | 1.85210200  | -1.70155800 | H  | 1.03229600   | 3.01051300  | 8.89585300  |
| C | 6.14816800   | 5.58017700  | -5.86260200 | H  | 3.20631400   | -1.35310500 | 9.53764000  |
| C | 7.03568000   | 4.67424000  | -4.98223400 | H  | 4.09064500   | 0.13944000  | 9.32924400  |
| C | 6.35032400   | 3.53809800  | -4.24286000 | H  | 2.36726600   | 0.06752900  | 8.96666400  |
| C | 5.07013000   | 3.67951100  | -3.67603000 | H  | 5.36443800   | 1.66045000  | 2.33874000  |
| C | 7.00069200   | 2.30261100  | -4.04575700 | H  | 4.14753000   | 2.42242800  | 3.33393800  |
| C | 4.46878500   | 2.65447300  | -2.95191900 | H  | 3.84091300   | 0.87960700  | 2.59122300  |
| C | 6.41856500   | 1.25965500  | -3.32226400 | H  | -4.93091300  | -3.19345700 | 2.19271200  |
| C | 5.13417000   | 1.42190600  | -2.75883900 | H  | -6.38169100  | -3.60864300 | 3.03834300  |
| O | 4.48232600   | 0.48662700  | -2.07141600 | H  | -4.83829900  | -0.81408800 | 1.38989400  |
| C | -3.26147700  | 1.38982800  | 1.09991800  | H  | -6.26717500  | -0.42222900 | 0.45256400  |
| C | -4.85490700  | 1.78574300  | -0.89058600 | H  | -8.38816000  | -2.76237900 | 2.00903600  |
| C | -6.35645900  | 1.59935100  | -1.14193600 | H  | -8.71446900  | -0.20506200 | 0.81453000  |
| O | -2.21813000  | 2.14392200  | 1.12923500  | H  | -9.59017900  | -0.78447000 | 2.27107200  |
| O | -6.82930800  | 0.44492400  | -0.83800100 | H  | -8.68518700  | 2.15199600  | -1.65897800 |
| O | -7.03894600  | 2.52643500  | -1.60535200 | H  | -10.42107900 | 2.53952500  | -1.54781500 |
| C | 4.10683200   | -2.70937400 | 2.47327800  | H  | -9.20544000  | -1.22074500 | -2.52153200 |
| N | 5.16724300   | -1.88566200 | -1.01526100 | H  | -8.10930100  | -0.05093800 | -1.73874800 |



|   |             |             |             |    |             |             |             |
|---|-------------|-------------|-------------|----|-------------|-------------|-------------|
| C | -0.39164600 | 5.42328300  | -2.36309900 | N  | 5.39360900  | -3.76214700 | 1.73409400  |
| C | 2.03308000  | 5.61172100  | -2.59325900 | C  | 10.52846600 | -2.53871200 | -4.28019400 |
| C | -0.46804800 | 4.55973800  | -3.46752500 | N  | 9.34829500  | -3.08464400 | -4.94261400 |
| C | 1.96055700  | 4.74622600  | -3.68128000 | C  | 8.06524100  | -2.74962300 | -4.65857700 |
| C | 0.71931900  | 4.22864500  | -4.11692400 | N  | 7.76382000  | -2.00003800 | -3.60265900 |
| C | 3.25301700  | 1.39756700  | 8.00711900  | N  | 7.07050400  | -3.20173900 | -5.42401500 |
| C | 2.47791900  | 2.11546000  | 6.88517200  | C  | -6.52454600 | 6.59480500  | -4.38091500 |
| C | 1.62199100  | 1.20654000  | 5.99699100  | C  | -7.04337800 | 6.45466800  | -2.93481000 |
| O | 2.04983700  | 0.78461300  | 4.92325700  | C  | -6.11109500 | 5.81667300  | -1.91685600 |
| N | 0.39606000  | 0.91021400  | 6.47843700  | C  | -5.19846500 | 4.80688000  | -2.26009100 |
| C | -4.50485000 | -7.18969500 | 1.54113200  | C  | -6.16578200 | 6.18431200  | -0.56032500 |
| C | -3.69408800 | -6.39470600 | 2.55834500  | C  | -4.38537400 | 4.19362000  | -1.30603600 |
| C | -2.72741800 | -5.39720700 | 2.00454500  | C  | -5.35618500 | 5.58606600  | 0.41125300  |
| N | -1.87184600 | -4.69706400 | 2.83472300  | C  | -4.44796500 | 4.57554100  | 0.04772400  |
| C | -2.54608300 | -4.85905500 | 0.75684800  | O  | -3.61144200 | 3.95913400  | 0.89765500  |
| C | -1.24177700 | -3.76385500 | 2.11064500  | C  | 1.28879900  | -2.48009300 | -1.43941700 |
| N | -1.61849200 | -3.83573400 | 0.83598200  | C  | 2.96562100  | -1.62872800 | -3.21257800 |
| C | -5.49246700 | -0.48784900 | 1.53202500  | C  | 4.33466000  | -2.08811000 | -3.73132800 |
| C | -4.97811200 | 0.19781100  | 0.25320700  | O  | 0.02190100  | -2.32763000 | -1.64288200 |
| C | -3.56952100 | -0.18626100 | -0.22121800 | O  | 5.21586200  | -2.33208400 | -2.82849200 |
| O | -3.29574700 | -1.46453800 | -0.17534700 | O  | 4.54339800  | -2.20658400 | -4.94806400 |
| O | -2.78403900 | 0.64572600  | -0.65527800 | C  | -2.95420700 | 0.42770800  | 5.23095700  |
| C | -5.89892100 | 2.43959200  | -6.25818400 | N  | -3.37321500 | 3.77561800  | 3.62540500  |
| C | -5.33505400 | 1.20469200  | -5.53814300 | O  | -1.85026800 | -0.17674700 | 5.18610000  |
| C | -3.81649900 | 1.24279600  | -5.35627600 | C  | -2.91365500 | 1.99060300  | 5.30940600  |
| C | -3.22242400 | -0.06843700 | -4.83937700 | N  | 0.23522600  | 1.24542000  | 1.01953100  |
| O | -3.87669000 | -1.09098300 | -4.70856700 | O  | -4.09669400 | -0.07040300 | 5.22351100  |
| N | -1.88266600 | -0.02643500 | -4.57658600 | C  | -3.62266200 | 2.64061200  | 4.15837900  |
| C | -5.32614100 | -5.96706100 | 5.83363800  | C  | 0.30579100  | 1.84308500  | -0.34410500 |
| C | -5.03784100 | -4.46860800 | 5.67832900  | C  | -0.72783100 | 1.97537400  | 1.89399500  |
| C | -3.56229300 | -4.08669600 | 5.55673600  | C  | 1.57436200  | 1.10280400  | 1.65689600  |
| O | -2.68314200 | -4.95211600 | 5.39464600  | Fe | -1.52962400 | -2.19607100 | -0.42878500 |
| N | -3.28850200 | -2.77961900 | 5.58867700  | C  | 2.09444500  | -2.81198200 | -2.70889800 |
| C | -2.78938600 | -7.34884800 | -3.68444100 | H  | 1.42296100  | -3.14585800 | -3.50779500 |
| C | -2.68120800 | -6.02315400 | -4.45873900 | H  | 2.73286700  | -3.66703900 | -2.44331200 |
| C | -2.76789600 | -4.83481000 | -3.54989800 | H  | -7.20829800 | 7.23392100  | -4.90190400 |
| N | -3.91547000 | -4.08669300 | -3.35530400 | H  | -5.55099600 | 7.03849000  | -4.38597200 |
| C | -1.86236200 | -4.32116100 | -2.65711400 | H  | -6.47908900 | 5.63545600  | -4.90868600 |
| C | -3.68288400 | -3.16596500 | -2.40159600 | H  | -5.34292300 | 2.60023300  | -7.15843000 |
| N | -2.44552900 | -3.29041000 | -1.94992200 | H  | -6.92530300 | 2.25974700  | -6.50067000 |
| C | 6.45230700  | -5.16776700 | -1.46953900 | H  | -5.83236100 | 3.34565200  | -5.64646200 |
| N | 6.52753700  | -4.52077100 | -0.15028400 | H  | 3.88583000  | 2.12998700  | 8.46679400  |
| C | 5.49140800  | -3.83816500 | 0.39036100  | H  | 3.86196100  | 0.61457900  | 7.60070500  |
| N | 4.59559200  | -3.27167800 | -0.39126700 | H  | 2.58686700  | 0.97007700  | 8.76818500  |

|   |             |             |             |   |             |             |             |
|---|-------------|-------------|-------------|---|-------------|-------------|-------------|
| H | -3.74656500 | -7.44977700 | -3.21707500 | H | -3.96480900 | -2.00724700 | 5.57054500  |
| H | -2.02173700 | -7.40544700 | -2.94114700 | H | -4.38133200 | -5.83605100 | 3.20674000  |
| H | -2.66330800 | -8.20041900 | -4.36836800 | H | -3.15592300 | -7.08322300 | 3.22630900  |
| H | -5.05265100 | -6.57961600 | 0.85355300  | H | -3.03153000 | -5.12200200 | -0.17380500 |
| H | -3.88626200 | -7.87262700 | 0.99729500  | H | -1.89521600 | -4.78742200 | 3.87395900  |
| H | -5.24496500 | -7.79992100 | 2.07758600  | H | -0.55438700 | -3.03014600 | 2.51687100  |
| H | -4.96558600 | -6.32903600 | 6.77418800  | H | -1.72335500 | -5.98426100 | -4.99748700 |
| H | -6.38537700 | -6.10815500 | 5.77992400  | H | -3.46385700 | -5.96067700 | -5.22919000 |
| H | -4.85091200 | -6.56385800 | 5.05111400  | H | -4.75061700 | -4.11864700 | -3.92550000 |
| H | -6.21469500 | 0.11860000  | 2.03806300  | H | -0.84198100 | -4.63124700 | -2.47141100 |
| H | -5.89591300 | -1.46703000 | 1.37771500  | H | -4.40556300 | -2.43522200 | -2.06516900 |
| H | -4.67272000 | -0.60814700 | 2.25143900  | H | -3.45815300 | 2.26421200  | 6.22759700  |
| H | 4.76601200  | -3.09524600 | 2.16199000  | H | -1.89274700 | 2.38436400  | 5.40781500  |
| H | 5.89479000  | -4.39367500 | 2.34145100  | H | -0.15941000 | 0.27927000  | 0.89317500  |
| H | 3.66808300  | -2.95021000 | -0.07508100 | H | -4.44589100 | 2.05785000  | 3.72531600  |
| H | 4.84555200  | -2.96539000 | -1.36744200 | H | -2.60408000 | 4.25446500  | 4.10362500  |
| H | 7.31551000  | -4.72534600 | 0.44853900  | H | -1.67587600 | 2.07750000  | 1.36298100  |
| H | 6.60758100  | -4.45858100 | -2.28772700 | H | -0.86592200 | 1.40353700  | 2.81430000  |
| H | 7.20170700  | -5.96425900 | -1.51204800 | H | -0.32136300 | 2.96659400  | 2.11901000  |
| H | 6.08718900  | -2.84448800 | -5.27831900 | H | 2.17844900  | 0.42153400  | 1.05245700  |
| H | 7.26008800  | -3.81335400 | -6.20393200 | H | 2.05213300  | 2.08785900  | 1.70493300  |
| H | 8.47701600  | -1.57230600 | -3.03304700 | H | 1.46655100  | 0.71093600  | 2.67394400  |
| H | 6.76547100  | -2.01610400 | -3.26785200 | H | 0.61088500  | 2.89068200  | -0.26980900 |
| H | 9.50711400  | -3.49413200 | -5.85401000 | H | 1.03318700  | 1.28500700  | -0.93926800 |
| H | 11.35837200 | -3.24357400 | -4.40509100 | H | -0.68439900 | 1.76274000  | -0.79863800 |
| H | 10.35699500 | -2.42477100 | -3.20506200 | H | -5.65918900 | 0.01129100  | -0.59399800 |
| H | -7.31400700 | 7.45645000  | -2.56649500 | H | -4.95267300 | 1.28436700  | 0.38544600  |
| H | -7.99236900 | 5.88949400  | -2.95011000 | H | -5.81827000 | 1.07620000  | -4.55756700 |
| H | -6.86338500 | 6.96425500  | -0.24504000 | H | -5.58869600 | 0.30229300  | -6.11351000 |
| H | -5.11946200 | 4.47705700  | -3.29546600 | H | -3.32213800 | 1.46370800  | -6.31810700 |
| H | -3.71024700 | 3.38506000  | -1.58124900 | H | -3.52256400 | 2.05580900  | -4.67475500 |
| H | -5.42909500 | 5.90200200  | 1.45346000  | H | -1.45270100 | -0.83079800 | -4.14059500 |
| H | -3.74922500 | 4.12207100  | 1.86406500  | H | -1.38046400 | 0.84786800  | -4.53713200 |
| H | 0.69092100  | 3.56966100  | -4.98729900 | H | 2.43922200  | -1.08567600 | -4.00728400 |
| H | 2.87140400  | 4.47378400  | -4.21771400 | H | 3.15783900  | -0.92681900 | -2.38936600 |
| H | -1.42723000 | 4.17595400  | -3.81375000 | O | 1.86787700  | -2.39812500 | -0.35461700 |
| H | 2.99587300  | 6.01668300  | -2.27662000 | H | 10.79711700 | -1.60037400 | -4.71883600 |
| H | -1.43207500 | 7.26208500  | 0.12271700  | H | 5.47038800  | -5.58792900 | -1.53610100 |
| H | -2.35751900 | 5.67357200  | -1.58237000 | H | 2.07409500  | 8.27064700  | -0.79978300 |
| H | 2.28939700  | 7.10532100  | 0.49726200  | H | 1.84714100  | 2.90583900  | 7.32249000  |
| H | 1.05740800  | 8.38111000  | 0.63382100  | H | 3.19158800  | 2.61200900  | 6.21434100  |
| H | -5.53695200 | -4.07200400 | 4.77756700  | H | 0.08855100  | 1.31617900  | 7.35023300  |
| H | -5.47846700 | -3.90688100 | 6.51660500  | H | -0.32543800 | 0.41385900  | 5.92203300  |
| H | -2.34064400 | -2.43515000 | 5.46169700  | O | -0.80503500 | -1.24599200 | 0.66916300  |

|                                     |             |             |             |   |             |             |             |
|-------------------------------------|-------------|-------------|-------------|---|-------------|-------------|-------------|
| C                                   | 6.44340200  | 0.97486800  | 3.98681100  | O | -2.10058600 | 1.14726600  | 0.48811100  |
| C                                   | 7.26650900  | 0.57901100  | 2.78094300  | C | -2.65086100 | 5.90618600  | 6.22269600  |
| C                                   | 6.70247200  | 0.50434000  | 1.49562300  | C | -1.96124100 | 5.82525700  | 4.85341700  |
| C                                   | 8.64109200  | 0.31234600  | 2.89417500  | C | -0.91198800 | 4.71667400  | 4.75074800  |
| C                                   | 7.46541200  | 0.18350100  | 0.36996500  | C | -0.10728000 | 4.75776400  | 3.44990800  |
| C                                   | 9.41958900  | -0.01298300 | 1.78021300  | O | -0.10222300 | 5.72579100  | 2.70578900  |
| C                                   | 8.83443300  | -0.07650100 | 0.50839500  | N | 0.63453500  | 3.64215500  | 3.19384600  |
| O                                   | 9.55377700  | -0.39483800 | -0.61310100 | C | -3.30940300 | 3.36380600  | -8.27950600 |
| H                                   | 10.49148700 | -0.38037900 | -0.39821500 | C | -3.67758600 | 2.44401400  | -7.11055300 |
| H                                   | 10.48711500 | -0.21242900 | 1.90575800  | C | -2.61340400 | 1.41486600  | -6.72671200 |
| H                                   | 7.00534800  | 0.14161900  | -0.61710500 | O | -1.47894600 | 1.43780800  | -7.23468100 |
| H                                   | 9.12345600  | 0.36335800  | 3.87247100  | N | -2.96450700 | 0.52778500  | -5.78997500 |
| H                                   | 5.63874200  | 0.71166200  | 1.36252700  | C | 3.20404400  | 7.98580200  | -2.35067900 |
| H                                   | 6.55030700  | 2.05139000  | 4.19374400  | C | 2.99808900  | 7.61731300  | -0.87006900 |
| H                                   | 6.76724400  | 0.44001400  | 4.89014000  | C | 2.03174300  | 6.48335300  | -0.70512500 |
| H                                   | 5.37403600  | 0.77690900  | 3.84348700  | N | 0.70076900  | 6.63471400  | -0.36069200 |
|                                     |             |             |             | C | 2.17050200  | 5.14291100  | -0.96744000 |
|                                     |             |             |             | C | 0.10013800  | 5.42719400  | -0.40501100 |
|                                     |             |             |             | N | 0.96453900  | 4.50258200  | -0.78251500 |
|                                     |             |             |             | C | 8.64126700  | -0.10482300 | -2.12664900 |
|                                     |             |             |             | N | 7.85920800  | -1.26916200 | -2.56343000 |
|                                     |             |             |             | C | 6.51366400  | -1.34044200 | -2.42881100 |
|                                     |             |             |             | N | 5.90557100  | -0.65001600 | -1.49105500 |
|                                     |             |             |             | N | 5.81897900  | -2.12361600 | -3.28283100 |
|                                     |             |             |             | C | 11.82593600 | -2.44996300 | 1.84638400  |
|                                     |             |             |             | N | 11.44391800 | -1.04385100 | 1.91215200  |
|                                     |             |             |             | C | 10.16459900 | -0.59296500 | 1.94561500  |
|                                     |             |             |             | N | 9.13931200  | -1.41194800 | 1.73684400  |
|                                     |             |             |             | N | 9.91575600  | 0.70030800  | 2.15807100  |
|                                     |             |             |             | C | -5.79491200 | 2.91630000  | 7.75776400  |
|                                     |             |             |             | C | -6.75191100 | 2.50322400  | 6.62000100  |
|                                     |             |             |             | C | -6.18273800 | 1.67295200  | 5.48228700  |
|                                     |             |             |             | C | -4.85581100 | 1.79942400  | 5.04244300  |
|                                     |             |             |             | C | -6.99665300 | 0.76128000  | 4.78662700  |
|                                     |             |             |             | C | -4.36279100 | 1.05154700  | 3.97177300  |
|                                     |             |             |             | C | -6.52028500 | -0.00073800 | 3.71556000  |
|                                     |             |             |             | C | -5.18454900 | 0.12971500  | 3.29626200  |
|                                     |             |             |             | O | -4.61973300 | -0.59662000 | 2.31892300  |
|                                     |             |             |             | C | 3.34967100  | 1.43444800  | -0.27929100 |
|                                     |             |             |             | C | 5.04553700  | 1.06645700  | 1.64064300  |
|                                     |             |             |             | C | 6.55824800  | 0.82025100  | 1.69865700  |
|                                     |             |             |             | O | 2.32017300  | 2.20086700  | -0.15195800 |
|                                     |             |             |             | O | 7.01178400  | -0.04979900 | 0.86868600  |
|                                     |             |             |             | O | 7.27174400  | 1.42897000  | 2.51029300  |
| <b><sup>5</sup>TS<sub>5-6</sub></b> |             |             |             |   |             |             |             |
| C                                   | -1.64837500 | -5.05450100 | 5.68809500  |   |             |             |             |
| C                                   | -1.81017900 | -3.56236400 | 5.60388600  |   |             |             |             |
| C                                   | -2.97719500 | -2.84065600 | 5.49120600  |   |             |             |             |
| C                                   | -0.75566500 | -2.58605600 | 5.76053100  |   |             |             |             |
| N                                   | -2.71785100 | -1.48835700 | 5.57596300  |   |             |             |             |
| C                                   | -1.36766600 | -1.29766100 | 5.74088200  |   |             |             |             |
| C                                   | 0.64112200  | -2.67458300 | 5.93474600  |   |             |             |             |
| C                                   | -0.62202900 | -0.11848600 | 5.90013900  |   |             |             |             |
| C                                   | 1.38366900  | -1.50591100 | 6.08087800  |   |             |             |             |
| C                                   | 0.75602000  | -0.23950700 | 6.06783900  |   |             |             |             |
| C                                   | -0.73055700 | -7.17647800 | -4.43091300 |   |             |             |             |
| C                                   | -1.21381800 | -6.48966500 | -3.13693000 |   |             |             |             |
| C                                   | -1.13508600 | -4.96030000 | -3.10220200 |   |             |             |             |
| O                                   | -0.24671300 | -4.38739600 | -2.47294700 |   |             |             |             |
| N                                   | -2.09973500 | -4.30820800 | -3.78912100 |   |             |             |             |
| C                                   | -0.35607800 | 5.97730500  | -6.03391300 |   |             |             |             |
| C                                   | -0.49888700 | 4.47324600  | -6.20873100 |   |             |             |             |
| C                                   | 0.07357200  | 3.62943600  | -5.11892800 |   |             |             |             |
| N                                   | 0.16897200  | 2.25773700  | -5.25311000 |   |             |             |             |
| C                                   | 0.46196300  | 3.90052700  | -3.83283100 |   |             |             |             |
| C                                   | 0.56247900  | 1.74224900  | -4.08257800 |   |             |             |             |
| N                                   | 0.75722200  | 2.71169900  | -3.19068300 |   |             |             |             |
| C                                   | -4.08297900 | 3.39272200  | -1.56953700 |   |             |             |             |
| C                                   | -3.62630000 | 2.86558300  | -0.19110300 |   |             |             |             |
| C                                   | -2.23345500 | 2.21994400  | -0.11199700 |   |             |             |             |
| O                                   | -1.25813600 | 2.87722500  | -0.64425000 |   |             |             |             |

|    |             |             |             |   |             |             |             |
|----|-------------|-------------|-------------|---|-------------|-------------|-------------|
| C  | -4.09944900 | -1.25285300 | -3.30212000 | H | 9.25655200  | -2.41073000 | 1.65370300  |
| N  | -5.50394000 | -1.98559800 | 0.09602600  | H | 8.22769700  | -0.96583700 | 1.45535400  |
| O  | -2.92103100 | -1.58060000 | -3.61274000 | H | 12.14583400 | -0.41375700 | 2.27816700  |
| C  | -4.85923600 | -2.18461800 | -2.30653700 | H | 12.84826500 | -2.52032800 | 1.45747100  |
| N  | -0.96307900 | -1.29700600 | 0.37050500  | H | 11.17612600 | -2.99897000 | 1.15763500  |
| O  | -4.73908800 | -0.26000000 | -3.69619900 | H | -7.58887700 | 1.94059900  | 7.06187900  |
| C  | -5.27196800 | -1.46958800 | -1.05060900 | H | -7.21267800 | 3.41442700  | 6.19866100  |
| C  | 0.34772200  | -1.29993800 | 1.08099100  | H | -8.03827700 | 0.63287200  | 5.09131600  |
| C  | -1.91545200 | -2.28838700 | 0.95520700  | H | -4.18666900 | 2.50309100  | 5.53703400  |
| C  | -0.80884900 | -1.47873100 | -1.08358700 | H | -3.34007800 | 1.18153500  | 3.62008100  |
| Fe | 0.59808600  | 2.36041100  | -1.14976200 | H | -7.18152600 | -0.70594100 | 3.20879000  |
| C  | 4.62201000  | 1.93685100  | 0.42553200  | H | -5.23004700 | -1.04829800 | 1.68870600  |
| H  | 4.49121800  | 2.97862600  | 0.73859500  | H | 1.36037300  | 0.65844900  | 6.21191800  |
| H  | 5.41106900  | 1.92620000  | -0.34082100 | H | 2.46386000  | -1.56568800 | 6.22604100  |
| H  | -6.41468100 | 3.27327200  | 8.55520700  | H | -1.10923200 | 0.85577900  | 5.91817800  |
| H  | -5.22207900 | 2.08052200  | 8.10124700  | H | 1.13584000  | -3.64687200 | 5.96546900  |
| H  | -5.10791000 | 3.71783600  | 7.46463400  | H | -3.99747100 | -3.19389900 | 5.36808500  |
| H  | -1.91624700 | 5.98937500  | 6.99653500  | H | -3.40490600 | -0.75481900 | 5.45035500  |
| H  | -3.28439300 | 6.76816800  | 6.23882100  | H | -0.99841900 | -5.45123100 | 4.89356600  |
| H  | -3.26234500 | 5.02043100  | 6.42898800  | H | -2.61329000 | -5.57372400 | 5.63085900  |
| H  | -0.74772700 | -8.22878700 | -4.22913800 | H | -3.88554400 | 3.03648000  | -6.20335600 |
| H  | 0.27289500  | -6.88209400 | -4.66692400 | H | -4.61862600 | 1.91245700  | -7.32193800 |
| H  | -1.37657200 | -6.96297700 | -5.29248100 | H | -2.30379700 | -0.16719500 | -5.45799600 |
| H  | 2.30054100  | 8.35919900  | -2.78549100 | H | -3.83298200 | 0.51515600  | -5.24061600 |
| H  | 3.53571600  | 7.12844300  | -2.89830800 | H | -1.56491900 | 4.22113200  | -6.28240400 |
| H  | 3.96882800  | 8.76979100  | -2.44811200 | H | -0.05632400 | 4.16749200  | -7.16794900 |
| H  | -0.78701200 | 6.36217900  | -5.13325200 | H | 0.52700100  | 4.85470700  | -3.32662500 |
| H  | 0.66544300  | 6.28834100  | -6.10172600 | H | -0.22697500 | 1.74319700  | -6.06757900 |
| H  | -0.88190200 | 6.47763200  | -6.86017500 | H | 0.67293800  | 0.68339000  | -3.88214200 |
| H  | -3.24232900 | 2.81178500  | -9.19409000 | H | 3.95981300  | 7.32751700  | -0.42209200 |
| H  | -4.06338000 | 4.11721800  | -8.37254300 | H | 2.65105200  | 8.49135700  | -0.29913000 |
| H  | -2.34455100 | 3.85469600  | -8.12907000 | H | 0.27395900  | 7.47439200  | 0.00821100  |
| H  | -5.14327600 | 3.30251100  | -1.68401700 | H | 3.05655400  | 4.60737200  | -1.28757000 |
| H  | -3.78930900 | 4.40368900  | -1.76203200 | H | -0.93775300 | 5.24818600  | -0.15615500 |
| H  | -3.65485100 | 2.77556700  | -2.37100300 | H | -5.77633100 | -2.50990200 | -2.82320300 |
| H  | 4.85196100  | -2.34661600 | -3.09170000 | H | -4.29081600 | -3.09295800 | -2.06281400 |
| H  | 6.20757500  | -2.42552200 | -4.16393100 | H | -1.37915800 | -0.32546400 | 0.48331500  |
| H  | 4.88645600  | -0.47136800 | -1.45767900 | H | -5.37348700 | -0.37975300 | -1.13759100 |
| H  | 6.39974600  | -0.37097800 | -0.60406800 | H | -5.41382600 | -3.00607000 | 0.07377500  |
| H  | 8.31281500  | -1.97969300 | -3.12037400 | H | -2.01224900 | -2.10094800 | 2.02601200  |
| H  | 8.81273400  | -0.10076000 | -1.04583600 | H | -2.88996200 | -2.15770800 | 0.48429500  |
| H  | 9.59895200  | -0.10848100 | -2.65691800 | H | -1.53273500 | -3.29821300 | 0.77207500  |
| H  | 8.92266200  | 1.02958200  | 2.30064000  | H | -0.15335200 | -0.39582800 | -1.44372600 |
| H  | 10.67250500 | 1.36048300  | 2.25625000  | H | -0.21832600 | -2.35729500 | -1.36507500 |



|    |             |             |             |   |             |             |             |
|----|-------------|-------------|-------------|---|-------------|-------------|-------------|
| H  | -1.74972700 | -1.38157100 | -1.63463000 | C | 0.41830400  | 6.17275000  | -1.88830000 |
| H  | 0.78124200  | -2.30514700 | 1.03347700  | N | -1.74280900 | 6.48328500  | -1.32119300 |
| H  | 1.00585900  | -0.58501500 | 0.58292000  | C | -0.92849100 | 5.85273500  | -2.23118900 |
| H  | 0.18623700  | -1.01458200 | 2.12399200  | C | 1.46334900  | 5.65433300  | -2.68122800 |
| H  | -3.63916300 | 3.67656200  | 0.55573000  | C | -1.24572100 | 5.04729300  | -3.33602700 |
| H  | -4.32501000 | 2.10824200  | 0.17820700  | C | 1.15211200  | 4.85114700  | -3.77499900 |
| H  | -2.71221800 | 5.68916500  | 4.05959600  | C | -0.19100700 | 4.55418200  | -4.10092400 |
| H  | -1.46932000 | 6.78381000  | 4.63423300  | C | 3.25301600  | 1.39756500  | 8.00712900  |
| H  | -0.18581700 | 4.79999300  | 5.57831700  | C | 2.48432400  | 2.10427800  | 6.88147100  |
| H  | -1.37625000 | 3.72462300  | 4.85697400  | C | 1.62980200  | 1.23009900  | 5.96173300  |
| H  | 1.18389900  | 3.60026900  | 2.34622800  | O | 1.66395800  | 1.39505100  | 4.74314400  |
| H  | 0.58831100  | 2.81800900  | 3.77300500  | N | 0.83849000  | 0.31562400  | 6.56644300  |
| H  | 4.71819800  | 1.53903600  | 2.57474100  | C | -4.50484900 | -7.18969200 | 1.54113600  |
| H  | 4.56878200  | 0.07827100  | 1.57382100  | C | -3.69514700 | -6.38821500 | 2.55482900  |
| O  | 3.38265800  | 0.37749800  | -0.91573000 | C | -2.74558700 | -5.37324600 | 2.00142500  |
| H  | 11.79219500 | -2.88534100 | 2.82329900  | N | -1.92378300 | -4.64344100 | 2.84019900  |
| H  | 8.08026700  | 0.76362700  | -2.40270300 | C | -2.54995800 | -4.84679800 | 0.74976500  |
| H  | -1.19484800 | -5.27758300 | 6.63127400  | C | -1.29732500 | -3.70752500 | 2.11799700  |
| H  | -2.25063300 | -6.79963100 | -2.92741100 | N | -1.64482100 | -3.80390200 | 0.83513300  |
| H  | -0.60130300 | -6.83888900 | -2.29556800 | C | -5.74788200 | -0.95186000 | 1.32885000  |
| H  | -2.83294900 | -4.83208700 | -4.24461800 | C | -5.05929600 | 0.12450300  | 0.47048700  |
| H  | -2.24341500 | -3.28624800 | -3.71923400 | C | -3.60256100 | -0.10085500 | 0.04656400  |
| O  | 0.32708200  | 0.65782600  | -1.41743600 | O | -3.24323500 | -1.32121400 | -0.18429200 |
| C  | 3.50102400  | -6.17552600 | -1.22771600 | O | -2.85156700 | 0.86926200  | -0.09593300 |
| C  | 4.84454400  | -5.83800800 | -0.62085400 | C | -5.89890800 | 2.43959100  | -6.25818500 |
| C  | 4.98010100  | -4.79952200 | 0.31884400  | C | -5.32735100 | 1.22305400  | -5.51700900 |
| C  | 5.99915700  | -6.56955800 | -0.93928600 | C | -3.82291600 | 1.31997000  | -5.25174500 |
| C  | 6.20425000  | -4.50340100 | 0.91981000  | C | -3.20576000 | 0.01632200  | -4.74107100 |
| C  | 7.23558400  | -6.28415200 | -0.35050700 | O | -3.74650800 | -1.06964400 | -4.88308300 |
| C  | 7.34246200  | -5.24910200 | 0.58630500  | N | -1.97994700 | 0.14602200  | -4.15834100 |
| O  | 8.53062400  | -4.92380700 | 1.18888400  | C | -5.32614200 | -5.96706000 | 5.83364300  |
| H  | 9.16741700  | -5.62781900 | 1.03223000  | C | -5.06748600 | -4.46621100 | 5.68330700  |
| H  | 8.11444800  | -6.87531700 | -0.62139200 | C | -3.60278100 | -4.04615800 | 5.57108100  |
| H  | 6.28166800  | -3.70226500 | 1.65434600  | O | -2.70012800 | -4.88589800 | 5.40330100  |
| H  | 5.94019100  | -7.38758100 | -1.66022000 | N | -3.37890900 | -2.73290300 | 5.61013900  |
| H  | 4.10466800  | -4.20932500 | 0.59874900  | C | -2.78938700 | -7.34884800 | -3.68443900 |
| H  | 2.90001400  | -6.78549900 | -0.53537200 | C | -2.70254700 | -6.04869200 | -4.50021900 |
| H  | 3.60953800  | -6.75116400 | -2.15624700 | C | -2.79995900 | -4.83348200 | -3.63151800 |
| H  | 2.91077500  | -5.27839400 | -1.45590800 | N | -3.94190900 | -4.07064700 | -3.46483500 |
|    |             |             |             | C | -1.89551700 | -4.30258300 | -2.74926200 |
|    |             |             |             | C | -3.69954300 | -3.12562700 | -2.53287600 |
|    |             |             |             | N | -2.46723000 | -3.24829000 | -2.07211800 |
|    |             |             |             | C | 6.45230700  | -5.16776600 | -1.46953900 |
|    |             |             |             | N | 6.52376600  | -4.44782400 | -0.18985500 |
| 56 |             |             |             |   |             |             |             |
| C  | 1.54935200  | 7.69450200  | -0.06647800 |   |             |             |             |
| C  | 0.37236400  | 7.03523600  | -0.72880700 |   |             |             |             |
| C  | -0.96178300 | 7.18981200  | -0.42783500 |   |             |             |             |

|    |             |             |             |   |             |             |             |
|----|-------------|-------------|-------------|---|-------------|-------------|-------------|
| C  | 5.52012300  | -3.67856000 | 0.29191900  | H | 3.86196000  | 0.61458400  | 7.60069400  |
| N  | 4.64266400  | -3.13774400 | -0.52612600 | H | 2.60019500  | 0.97449900  | 8.78266200  |
| N  | 5.43978800  | -3.48639700 | 1.62644500  | H | -3.74656500 | -7.44977900 | -3.21707600 |
| C  | 10.52846700 | -2.53871200 | -4.28019600 | H | -2.02173700 | -7.40544700 | -2.94114700 |
| N  | 9.40065200  | -3.12688600 | -4.99278200 | H | -2.66480600 | -8.21631600 | -4.34983900 |
| C  | 8.10031100  | -2.81132300 | -4.77503000 | H | -5.05264900 | -6.57961600 | 0.85355100  |
| N  | 7.74471300  | -2.02675200 | -3.76263800 | H | -3.88626100 | -7.87262800 | 0.99729700  |
| N  | 7.14647900  | -3.31383600 | -5.55992400 | H | -5.24314300 | -7.79975100 | 2.08008800  |
| C  | -6.52454300 | 6.59480400  | -4.38091900 | H | -4.96559200 | -6.32903200 | 6.77419200  |
| C  | -7.13967500 | 6.51756600  | -2.96068200 | H | -6.38537500 | -6.10816300 | 5.77991200  |
| C  | -6.29177700 | 6.06759400  | -1.78731000 | H | -4.84686400 | -6.55610800 | 5.04809300  |
| C  | -5.68436800 | 4.79996400  | -1.73099100 | H | -6.53728400 | -0.50098900 | 1.89368100  |
| C  | -6.16500000 | 6.88695100  | -0.65416100 | H | -6.13625800 | -1.78024400 | 0.77360000  |
| C  | -5.00511500 | 4.36050800  | -0.59516600 | H | -5.04263900 | -1.35308000 | 2.06968600  |
| C  | -5.49646700 | 6.46086700  | 0.49867500  | H | 4.83450900  | -2.76853000 | 2.00036800  |
| C  | -4.92653600 | 5.18183200  | 0.54212600  | H | 5.89907700  | -4.10214300 | 2.28129200  |
| O  | -4.29298000 | 4.68482300  | 1.63483600  | H | 3.74161100  | -2.74025800 | -0.22222000 |
| C  | 1.34701200  | -2.44061000 | -1.60060500 | H | 4.87670800  | -2.93161700 | -1.53400000 |
| C  | 2.96589500  | -1.76821800 | -3.49181300 | H | 7.29902900  | -4.63898500 | 0.42946800  |
| C  | 4.34611900  | -2.22839300 | -3.97322900 | H | 6.62617300  | -4.50825900 | -2.32509700 |
| O  | 0.08293100  | -2.38074600 | -1.77346600 | H | 7.19623500  | -5.97034600 | -1.45795300 |
| O  | 5.20862100  | -2.45292200 | -3.04633200 | H | 6.15113800  | -2.97544300 | -5.45969900 |
| O  | 4.58977200  | -2.35545700 | -5.18210300 | H | 7.37507900  | -3.96854000 | -6.29297300 |
| C  | -2.61135600 | 0.32641100  | 5.65732100  | H | 8.42744100  | -1.55049900 | -3.19428000 |
| N  | -1.67306400 | 3.75227300  | 4.78730400  | H | 6.73985100  | -2.07326900 | -3.45062400 |
| O  | -1.64385500 | -0.49108100 | 5.61241300  | H | 9.61374600  | -3.55330000 | -5.88515000 |
| C  | -2.29923100 | 1.76675800  | 6.17741400  | H | 11.38303200 | -3.22157700 | -4.35041100 |
| N  | -0.64133400 | 1.72196300  | 1.33856600  | H | 10.29904400 | -2.41425100 | -3.21699600 |
| O  | -3.78967800 | 0.10929900  | 5.32811100  | H | -7.52895500 | 7.51667100  | -2.71544300 |
| C  | -2.46353000 | 2.80059700  | 5.09867200  | H | -8.03292200 | 5.87109200  | -3.00955500 |
| C  | 0.74656900  | 1.82829100  | 0.80965600  | H | -6.61945200 | 7.88009700  | -0.65451600 |
| C  | -1.27923500 | 3.07520200  | 1.48393300  | H | -5.75859900 | 4.12562100  | -2.58559200 |
| C  | -0.70994500 | 0.94821900  | 2.56902300  | H | -4.54108200 | 3.37693000  | -0.56714700 |
| Fe | -1.49024700 | -2.17447300 | -0.43932300 | H | -5.43770800 | 7.12016800  | 1.36829400  |
| C  | 2.16372800  | -2.90927200 | -2.81114000 | H | -4.28796500 | 5.32151900  | 2.35622900  |
| H  | 1.49899700  | -3.38263800 | -3.54249100 | H | -0.40521700 | 3.94209200  | -4.97917800 |
| H  | 2.84818200  | -3.68632300 | -2.44298800 | H | 1.95342200  | 4.45526500  | -4.40165700 |
| H  | -7.20829900 | 7.23392100  | -4.90190300 | H | -2.28237800 | 4.83241300  | -3.59379800 |
| H  | -5.55099700 | 7.03849300  | -4.38597200 | H | 2.50419100  | 5.88671300  | -2.44953300 |
| H  | -6.47520600 | 5.62224900  | -4.88077200 | H | -1.42533200 | 7.76900100  | 0.36631400  |
| H  | -5.34292400 | 2.60023600  | -7.15843000 | H | -2.75027500 | 6.42510900  | -1.29362500 |
| H  | -6.92530500 | 2.25975000  | -6.50066500 | H | 2.25248300  | 6.95947300  | 0.35450500  |
| H  | -5.83811700 | 3.35375500  | -5.65581400 | H | 1.23606200  | 8.36479900  | 0.74373600  |
| H  | 3.88583300  | 2.12998500  | 8.46679300  | H | -5.57201200 | -4.08133000 | 4.78036800  |

|   |             |             |             |                                |             |             |             |
|---|-------------|-------------|-------------|--------------------------------|-------------|-------------|-------------|
| H | -5.52718800 | -3.91913700 | 6.52136600  | H                              | 0.00025000  | -0.07132200 | 6.08238100  |
| H | -2.45504400 | -2.29370400 | 5.53324000  | O                              | -0.40404100 | -1.15367800 | 0.64326400  |
| H | -4.10947500 | -2.02568000 | 5.64554100  | C                              | 5.71261100  | 1.78634700  | 3.14354200  |
| H | -4.38409000 | -5.84170500 | 3.21162800  | C                              | 6.67153900  | 1.24159200  | 2.10895800  |
| H | -3.14246300 | -7.07224900 | 3.21588700  | C                              | 6.25470000  | 0.99230500  | 0.78825000  |
| H | -3.00815200 | -5.12816200 | -0.19007300 | C                              | 8.02073100  | 1.00103700  | 2.41097500  |
| H | -1.95665700 | -4.72363900 | 3.88176700  | C                              | 7.13741700  | 0.53104600  | -0.18921900 |
| H | -0.63874600 | -2.94994800 | 2.52904200  | C                              | 8.91881600  | 0.53466700  | 1.44530200  |
| H | -1.74906900 | -6.01402200 | -5.04724300 | C                              | 8.48071400  | 0.29959900  | 0.13634800  |
| H | -3.49100000 | -6.02725100 | -5.26680600 | O                              | 9.31748100  | -0.15959100 | -0.84655100 |
| H | -4.77467800 | -4.11359300 | -4.03742600 | H                              | 10.22488700 | -0.12122500 | -0.52892900 |
| H | -0.87716600 | -4.61523900 | -2.55583000 | H                              | 9.96375200  | 0.36089000  | 1.71558100  |
| H | -4.41715800 | -2.37752100 | -2.22132900 | H                              | 6.79172300  | 0.35735100  | -1.20778100 |
| H | -3.04426300 | 1.97437600  | 6.96126800  | H                              | 8.39014400  | 1.18391600  | 3.42214100  |
| H | -1.30065300 | 1.83618700  | 6.62616600  | H                              | 5.21378800  | 1.17179100  | 0.51006200  |
| H | -1.23293700 | 1.20577300  | 0.64647800  | H                              | 5.55033300  | 2.86570300  | 2.99740300  |
| H | -3.38634100 | 2.70309200  | 4.50859800  | H                              | 6.09799600  | 1.65006700  | 4.16205900  |
| H | -0.84939500 | 3.74338400  | 5.39846900  | H                              | 4.72781400  | 1.30421000  | 3.09050600  |
| H | -1.17885200 | 3.60871400  | 0.53626900  |                                |             |             |             |
| H | -2.33459200 | 2.93600700  | 1.71264600  | <sup>5</sup> TS <sub>6-7</sub> |             |             |             |
| H | -0.79938400 | 3.61861700  | 2.30229000  | C                              | -1.69658300 | 7.30210300  | -2.02175500 |
| H | 0.53134600  | -1.39056600 | 0.49045300  | C                              | -2.05983300 | 6.05885000  | -2.78448900 |
| H | 0.10084300  | 1.04738700  | 3.29202100  | C                              | -3.29251500 | 5.45360600  | -2.88718200 |
| H | -1.66466400 | 0.48382700  | 2.78562500  | C                              | -1.17435300 | 5.29551000  | -3.63457000 |
| H | 1.35993000  | 2.37789500  | 1.53099100  | N                              | -3.22931200 | 4.37112300  | -3.74177300 |
| H | 1.13867800  | 0.82066200  | 0.66638800  | C                              | -1.94658100 | 4.24992200  | -4.22122200 |
| H | 0.72248700  | 2.36172800  | -0.14582300 | C                              | 0.19157100  | 5.40386500  | -3.96948600 |
| H | -5.62533700 | 0.30015400  | -0.46022500 | C                              | -1.39188200 | 3.33123800  | -5.12630200 |
| H | -5.06735300 | 1.08269600  | 1.00393300  | C                              | 0.74551800  | 4.49225300  | -4.86380300 |
| H | -5.85681800 | 1.07308400  | -4.56252200 | C                              | -0.04120200 | 3.46825600  | -5.43934000 |
| H | -5.51319300 | 0.31340000  | -6.10557300 | C                              | -0.84876300 | 3.72215200  | 7.68402500  |
| H | -3.29077000 | 1.57049900  | -6.18608900 | C                              | -1.30624900 | 3.79299200  | 6.21374400  |
| H | -3.59715000 | 2.13687600  | -4.54948000 | C                              | -1.13037900 | 2.49618800  | 5.41374000  |
| H | -1.52353000 | -0.67951700 | -3.79440500 | O                              | -0.15122800 | 2.31780400  | 4.69559800  |
| H | -1.57881900 | 1.04593000  | -3.94120600 | N                              | -2.11888200 | 1.58411700  | 5.57241900  |
| H | 2.40050200  | -1.35642600 | -4.33622700 | C                              | -0.23836700 | -8.25848800 | 2.04255500  |
| H | 3.14127700  | -0.95648800 | -2.77085500 | C                              | -0.39997200 | -7.07007000 | 2.98249300  |
| O | 1.94050100  | -2.15617700 | -0.53996800 | C                              | 0.15081800  | -5.76426000 | 2.50708000  |
| H | 10.79711900 | -1.60037400 | -4.71883500 | N                              | 0.12791800  | -4.64692700 | 3.32031100  |
| H | 5.47038800  | -5.58793000 | -1.53610000 | C                              | 0.61296400  | -5.32317500 | 1.29393600  |
| H | 2.07409000  | 8.27065800  | -0.79977800 | C                              | 0.52426400  | -3.58857300 | 2.60435400  |
| H | 1.81631700  | 2.87128200  | 7.30902600  | N                              | 0.83796400  | -3.95961100 | 1.36314100  |
| H | 3.18474900  | 2.63936000  | 6.22787100  | C                              | -3.99828000 | -3.74543800 | -0.40615400 |
| H | 0.78396800  | 0.31352600  | 7.57530700  | C                              | -3.55014400 | -2.57409500 | -1.29526200 |

|   |             |             |             |    |             |             |             |
|---|-------------|-------------|-------------|----|-------------|-------------|-------------|
| C | -2.11454200 | -2.06684400 | -1.13926300 | O  | 7.12843000  | 0.43755900  | -0.57229000 |
| O | -1.24228300 | -2.87775600 | -0.65305700 | O  | 7.51278800  | 0.04163800  | -2.72826100 |
| O | -1.82822900 | -0.91587900 | -1.50959700 | C  | -4.04955300 | -0.71836200 | 3.51497400  |
| C | -2.49638800 | -1.70315200 | -8.32204000 | N  | -5.27346500 | 1.79269500  | 1.02005100  |
| C | -1.79834400 | -2.34785600 | -7.11740700 | O  | -2.89963100 | -0.67771100 | 4.02624800  |
| C | -0.76465100 | -1.43504400 | -6.45608100 | C  | -4.72648900 | 0.65245200  | 3.17481400  |
| C | 0.03871700  | -2.12208700 | -5.35212100 | N  | -0.78880100 | 1.18966900  | -0.20182100 |
| O | -0.09471700 | -3.30330400 | -5.07467100 | O  | -4.73203400 | -1.72654500 | 3.24785000  |
| N | 0.94284700  | -1.32388300 | -4.71364800 | C  | -5.14731600 | 0.74109100  | 1.73863400  |
| C | -3.24593400 | -7.28352400 | 5.29815800  | C  | 0.47356800  | 1.54868900  | -0.90408800 |
| C | -3.66497900 | -5.89682500 | 4.79526100  | C  | -1.84128600 | 2.24275600  | -0.38434100 |
| C | -2.64567100 | -4.77790900 | 5.00479100  | C  | -0.57594500 | 0.86524500  | 1.19894800  |
| O | -1.50087800 | -5.02008400 | 5.42789200  | Fe | 0.66531100  | -2.62322500 | -0.22040400 |
| N | -3.04558900 | -3.55049800 | 4.66400700  | C  | 4.81795400  | -1.48820900 | -1.15859600 |
| C | 3.36925200  | -7.94741600 | -2.10028200 | H  | 4.78904500  | -2.33004900 | -1.85909200 |
| C | 3.16848800  | -6.87326000 | -3.18252800 | H  | 5.55008400  | -1.73869800 | -0.37855800 |
| C | 2.17634300  | -5.83704600 | -2.75405500 | H  | -6.30066900 | 1.71501500  | -8.94105800 |
| N | 0.84359500  | -5.82287500 | -3.12594900 | H  | -5.13152500 | 2.49922400  | -7.90706400 |
| C | 2.29108400  | -4.82301600 | -1.83833300 | H  | -4.99674200 | 0.76707100  | -8.22172700 |
| C | 0.21829100  | -4.82964900 | -2.46076600 | H  | -1.75802900 | -1.35124300 | -9.01222200 |
| N | 1.06991500  | -4.21055800 | -1.66292200 | H  | -3.11401300 | -2.43281700 | -8.80241400 |
| C | 8.65795900  | -0.90558200 | 2.08468700  | H  | -3.12131100 | -0.85157100 | -8.03110000 |
| N | 7.84329500  | -0.13535000 | 3.03364300  | H  | -0.88484500 | 4.71978100  | 8.07341300  |
| C | 6.50477400  | 0.01998800  | 2.91576200  | H  | 0.15900500  | 3.36107500  | 7.73959800  |
| N | 5.92043000  | -0.11313200 | 1.74458500  | H  | -1.49139700 | 3.07369000  | 8.29462100  |
| N | 5.79009900  | 0.30967600  | 4.02511700  | H  | 2.47141300  | -8.50750600 | -1.94220500 |
| C | 11.81130600 | 3.23904700  | 0.00977700  | H  | 3.68348000  | -7.50886700 | -1.17621000 |
| N | 11.51197000 | 2.07358700  | -0.81218200 | H  | 4.14611100  | -8.66087600 | -2.41259800 |
| C | 10.26473400 | 1.62713400  | -1.10043200 | H  | -0.65941600 | -8.11051100 | 1.06999600  |
| N | 9.18991100  | 2.15334900  | -0.52352500 | H  | 0.78846200  | -8.54361800 | 1.94696300  |
| N | 10.10159700 | 0.61275000  | -1.95225700 | H  | -0.75858000 | -9.12384900 | 2.47726900  |
| C | -5.69002200 | 1.60104300  | -8.06839600 | H  | -3.19187400 | -7.30241900 | 6.36697600  |
| C | -6.68534700 | 1.35845500  | -6.90960000 | H  | -3.98631500 | -7.98108000 | 4.96646200  |
| C | -6.14307300 | 1.33805500  | -5.49244700 | H  | -2.27125900 | -7.59082500 | 4.91219700  |
| C | -5.08997600 | 0.48373200  | -5.11807200 | H  | -5.06040300 | -3.74476600 | -0.27436300 |
| C | -6.72108600 | 2.11511900  | -4.47598800 | H  | -3.68673100 | -4.69944600 | -0.77786000 |
| C | -4.64166700 | 0.40307000  | -3.80379500 | H  | -3.57563700 | -3.63487400 | 0.60063900  |
| C | -6.29405000 | 2.03750800  | -3.14207600 | H  | 4.82561900  | 0.60205000  | 3.94621100  |
| C | -5.25097000 | 1.16531600  | -2.78787000 | H  | 6.14566800  | 0.11676200  | 4.95012600  |
| O | -4.77340600 | 1.00393200  | -1.54460900 | H  | 4.90314100  | -0.21141400 | 1.61470800  |
| C | 3.46091700  | -1.35738400 | -0.45741600 | H  | 6.44096100  | 0.04943400  | 0.84206500  |
| C | 5.25436700  | -0.20026200 | -1.90706700 | H  | 8.27768800  | 0.20441500  | 3.88034500  |
| C | 6.74978300  | 0.10215300  | -1.75315600 | H  | 8.86127800  | -0.34999600 | 1.16414800  |
| O | 2.48630600  | -1.97843900 | -0.99946500 | H  | 9.59907800  | -1.17351300 | 2.57516200  |

|   |             |             |             |    |             |             |             |
|---|-------------|-------------|-------------|----|-------------|-------------|-------------|
| H | 9.13410300  | 0.35362500  | -2.28236800 | H  | 1.55252600  | -0.75911600 | 1.00253200  |
| H | 10.90011600 | 0.12575600  | -2.33112600 | H  | 0.10134500  | 1.50842600  | 1.75497200  |
| H | 9.21239700  | 3.00903300  | 0.01561900  | H  | -1.39122900 | 0.36156000  | 1.70661100  |
| H | 8.30888300  | 1.58259700  | -0.55482500 | H  | 0.87658600  | 2.47634800  | -0.48216500 |
| H | 12.24745800 | 1.77424100  | -1.43920500 | H  | 1.18070500  | 0.73057700  | -0.76261300 |
| H | 12.81917100 | 3.13002700  | 0.42679600  | H  | 0.26095500  | 1.69064800  | -1.96673700 |
| H | 11.11393300 | 3.30893300  | 0.85042100  | H  | -3.66916200 | -2.82424600 | -2.36261900 |
| H | -7.46611900 | 2.13182900  | -6.96691300 | H  | -4.18593600 | -1.69517600 | -1.13803300 |
| H | -7.21030500 | 0.40498600  | -7.09526300 | H  | -2.53817600 | -2.66448000 | -6.36714000 |
| H | -7.54346400 | 2.79238200  | -4.71983000 | H  | -1.29309200 | -3.26994100 | -7.44004200 |
| H | -4.61663500 | -0.14851400 | -5.86931700 | H  | -0.04536600 | -1.06440900 | -7.20678400 |
| H | -3.82085600 | -0.25561600 | -3.52624700 | H  | -1.24780300 | -0.53852900 | -6.03681000 |
| H | -6.78541900 | 2.63946800  | -2.37484900 | H  | 1.47761400  | -1.70638100 | -3.94583900 |
| H | -5.22617700 | 1.47997500  | -0.80694300 | H  | 1.00081300  | -0.33259100 | -4.89094600 |
| H | 0.41441100  | 2.78282500  | -6.15677000 | H  | 5.00519400  | -0.27429400 | -2.97234800 |
| H | 1.79864900  | 4.57676400  | -5.13840700 | H  | 4.72234900  | 0.66929500  | -1.49388100 |
| H | -2.00178400 | 2.54971300  | -5.57713000 | O  | 3.37852900  | -0.66599800 | 0.58022500  |
| H | 0.80624400  | 6.19838900  | -3.54290400 | H  | 11.77258900 | 4.12727200  | -0.58571700 |
| H | -4.23443200 | 5.72380500  | -2.41686400 | H  | 8.11212200  | -1.79534100 | 1.84905200  |
| H | -4.00303700 | 3.75841800  | -3.96115800 | H  | -1.24437900 | 7.99948100  | -2.69570600 |
| H | -0.97498800 | 7.09720000  | -1.21561400 | H  | -2.35778800 | 4.11977600  | 6.16882400  |
| H | -2.57871800 | 7.77554600  | -1.57210300 | H  | -0.71260100 | 4.55395700  | 5.68961300  |
| H | -3.87751900 | -5.92952700 | 3.71303700  | H  | -2.92041200 | 1.80815500  | 6.14379500  |
| H | -4.61609200 | -5.59531900 | 5.26150500  | H  | -2.20282500 | 0.73406800  | 4.99043500  |
| H | -2.43229300 | -2.74077400 | 4.73066000  | O  | 0.65142400  | -1.11977400 | 0.88014900  |
| H | -3.92397200 | -3.30078600 | 4.19892200  | C  | 3.19687200  | 5.09511500  | 3.75612500  |
| H | -1.46856500 | -6.90778400 | 3.17439200  | C  | 4.57554800  | 5.00356900  | 3.14057500  |
| H | 0.04157600  | -7.30986400 | 3.96114900  | C  | 4.78984900  | 4.31298800  | 1.93306200  |
| H | 0.77292300  | -5.88150100 | 0.38044200  | C  | 5.68621300  | 5.63260400  | 3.72368200  |
| H | -0.31238100 | -4.64016700 | 4.26766400  | C  | 6.04581500  | 4.25521400  | 1.32744500  |
| H | 0.53646300  | -2.56765900 | 2.97048800  | C  | 6.95441900  | 5.57949600  | 3.13492600  |
| H | 4.12565400  | -6.37719900 | -3.39909400 | C  | 7.13790100  | 4.89234200  | 1.93003000  |
| H | 2.84662400  | -7.33647800 | -4.12706300 | O  | 8.36316200  | 4.81054500  | 1.31237900  |
| H | 0.42459000  | -6.37321500 | -3.86403200 | H  | 8.95419300  | 5.46320400  | 1.70035200  |
| H | 3.16916100  | -4.50708600 | -1.28877300 | H  | 7.79742800  | 6.08002600  | 3.61842100  |
| H | -0.82761200 | -4.58242300 | -2.58577600 | H  | 6.18279000  | 3.72811300  | 0.38437000  |
| H | -5.63971200 | 0.70156100  | 3.79029900  | H  | 5.56707500  | 6.18199700  | 4.65956300  |
| H | -4.10004200 | 1.51215600  | 3.45004300  | H  | 3.95040400  | 3.81463200  | 1.44294000  |
| H | -1.15437000 | 0.30833500  | -0.67764000 | H  | 2.54676700  | 5.75440600  | 3.16011900  |
| H | -5.35893700 | -0.22127200 | 1.25341400  | H  | 3.23565400  | 5.50721800  | 4.77226800  |
| H | -5.08033300 | 2.64312800  | 1.55759900  | H  | 2.69864400  | 4.11762600  | 3.81091000  |
| H | -1.98347800 | 2.41785300  | -1.45178400 |    |             |             |             |
| H | -2.77719400 | 1.88237300  | 0.04480600  | 57 |             |             |             |
| H | -1.51544600 | 3.16274100  | 0.11244800  | C  | 1.54953300  | 7.69424700  | -0.06641300 |

|   |             |             |             |    |             |             |             |
|---|-------------|-------------|-------------|----|-------------|-------------|-------------|
| C | 0.39138500  | 7.01669100  | -0.74328100 | C  | 6.45231000  | -5.16776500 | -1.46954000 |
| C | -0.94444800 | 7.10435200  | -0.42515900 | N  | 6.54606300  | -4.55068100 | -0.13760100 |
| C | 0.46015900  | 6.21144200  | -1.94261000 | C  | 5.52589600  | -3.84974300 | 0.41569200  |
| N | -1.70570800 | 6.41289800  | -1.34694300 | N  | 4.65766100  | -3.22625200 | -0.34668400 |
| C | -0.87601100 | 5.85886500  | -2.29179800 | N  | 5.42661200  | -3.81129600 | 1.76329600  |
| C | 1.51672500  | 5.77303600  | -2.76724900 | C  | 10.52850800 | -2.53872800 | -4.28018600 |
| C | -1.17308700 | 5.10381100  | -3.43701900 | N  | 9.33631100  | -3.07333900 | -4.92975500 |
| C | 1.22608000  | 5.01716000  | -3.89930800 | C  | 8.06148900  | -2.71212200 | -4.63528000 |
| C | -0.10768600 | 4.69054000  | -4.23360500 | N  | 7.78439000  | -1.96167600 | -3.57415200 |
| C | 3.25455200  | 1.39768700  | 8.00618500  | N  | 7.05143200  | -3.13884800 | -5.39461200 |
| C | 2.37208500  | 2.07867300  | 6.94576100  | C  | -6.52429500 | 6.59443900  | -4.38150500 |
| C | 1.17356500  | 1.22584000  | 6.54438200  | C  | -7.12323500 | 6.47319000  | -2.95778000 |
| O | 1.25711000  | 0.43068400  | 5.59748700  | C  | -6.23550600 | 6.05014600  | -1.80133300 |
| N | 0.07079800  | 1.39517900  | 7.28782200  | C  | -5.54073300 | 4.82708700  | -1.77585100 |
| C | -4.50487600 | -7.18982500 | 1.54113000  | C  | -6.14470400 | 6.85707100  | -0.65538000 |
| C | -3.67485200 | -6.33224800 | 2.49673000  | C  | -4.80576600 | 4.42034300  | -0.66003900 |
| C | -2.80971000 | -5.26171000 | 1.89235900  | C  | -5.42305100 | 6.46238100  | 0.47519000  |
| N | -1.93934300 | -4.54977800 | 2.69541300  | C  | -4.75760900 | 5.22968500  | 0.48581300  |
| C | -2.71049000 | -4.67098800 | 0.65338900  | O  | -4.05484000 | 4.78109400  | 1.56349300  |
| C | -1.36917400 | -3.57652900 | 1.96319700  | C  | 1.44423800  | -2.20082500 | -1.22490300 |
| N | -1.81249000 | -3.61672500 | 0.71216000  | C  | 3.03544100  | -1.46176900 | -3.12728500 |
| C | -5.74789600 | -0.95185900 | 1.32901800  | C  | 4.37321800  | -1.97374700 | -3.67395200 |
| C | -4.98974000 | 0.09610200  | 0.49039000  | O  | 0.23967200  | -1.77739100 | -1.37086400 |
| C | -3.54697600 | -0.34045100 | 0.25884600  | O  | 5.25468600  | -2.27879900 | -2.78994800 |
| O | -3.31933700 | -1.06045200 | -0.76549500 | O  | 4.56746300  | -2.07046200 | -4.89621500 |
| O | -2.65158300 | -0.05784100 | 1.08135500  | C  | -3.36213800 | -0.15310100 | 8.09626500  |
| C | -5.89900500 | 2.43966400  | -6.25808100 | N  | -1.45357600 | 2.12387800  | 9.94303900  |
| C | -5.26158000 | 1.25168500  | -5.52648900 | O  | -2.46603100 | 0.16257100  | 7.26177500  |
| C | -3.75839700 | 1.45437800  | -5.29903600 | C  | -3.44222900 | 0.70507200  | 9.40239600  |
| C | -2.99909000 | 0.17211000  | -4.95678800 | N  | -2.15261500 | 0.84258000  | 3.56439900  |
| O | -3.39275700 | -0.93198100 | -5.30133400 | O  | -4.17882700 | -1.08439100 | 8.00215100  |
| N | -1.82448700 | 0.35080600  | -4.29108800 | C  | -2.56212400 | 1.91974800  | 9.34589900  |
| C | -5.32610400 | -5.96740400 | 5.83346200  | C  | -1.12493500 | 1.91147200  | 3.51460600  |
| C | -4.95036000 | -4.48123700 | 5.73114800  | C  | -3.41938400 | 1.30339800  | 4.18654400  |
| C | -3.44408400 | -4.25095500 | 5.85732100  | C  | -1.67442300 | -0.44723600 | 4.26729100  |
| O | -2.63651800 | -5.00589400 | 5.29137700  | Fe | -1.58145800 | -2.10807500 | -0.75239900 |
| N | -3.04230000 | -3.19911100 | 6.57945000  | C  | 2.16794400  | -2.60224100 | -2.52187800 |
| C | -2.78941100 | -7.34854400 | -3.68412400 | H  | 1.43230700  | -2.93277700 | -3.26443900 |
| C | -2.66692300 | -6.14168800 | -4.61823800 | H  | 2.79707700  | -3.47005700 | -2.28142500 |
| C | -2.69372500 | -4.84810100 | -3.87498300 | H  | -7.20837100 | 7.23401600  | -4.90169100 |
| N | -3.72420500 | -3.93132800 | -3.92804700 | H  | -5.55107800 | 7.03867300  | -4.38569800 |
| C | -1.83543800 | -4.35814100 | -2.92392400 | H  | -6.46781900 | 5.63114200  | -4.89908400 |
| C | -3.46667700 | -2.94147400 | -3.04734100 | H  | -5.34291800 | 2.60027500  | -7.15842000 |
| N | -2.33112900 | -3.18025100 | -2.41789500 | H  | -6.92529200 | 2.25970600  | -6.50068400 |

|   |             |             |             |   |             |             |             |
|---|-------------|-------------|-------------|---|-------------|-------------|-------------|
| H | -5.84505000 | 3.36020800  | -5.66405700 | H | 1.21790600  | 8.36640000  | 0.73507900  |
| H | 3.88508200  | 2.13028200  | 8.46735600  | H | -5.25418800 | -4.06434700 | 4.75586100  |
| H | 3.86154500  | 0.61405800  | 7.60108800  | H | -5.48526500 | -3.89574000 | 6.49185800  |
| H | 2.63758300  | 0.96517900  | 8.80689000  | H | -2.04330300 | -3.04460000 | 6.63920300  |
| H | -3.74662100 | -7.44990200 | -3.21721700 | H | -3.63675900 | -2.48855800 | 7.05004200  |
| H | -2.02164800 | -7.40560100 | -2.94125100 | H | -4.34957400 | -5.82209100 | 3.19631400  |
| H | -2.67342400 | -8.26509400 | -4.28672600 | H | -3.04534000 | -6.97578100 | 3.12857600  |
| H | -5.05265100 | -6.57954700 | 0.85361200  | H | -3.22704100 | -4.92132600 | -0.26624200 |
| H | -3.88624900 | -7.87259600 | 0.99727000  | H | -1.90020400 | -4.68395200 | 3.72067700  |
| H | -5.22718100 | -7.78556900 | 2.11418700  | H | -0.66338400 | -2.85360400 | 2.36211500  |
| H | -4.96558300 | -6.32912000 | 6.77415500  | H | -1.72611600 | -6.21262100 | -5.18490600 |
| H | -6.38541800 | -6.10792100 | 5.78012400  | H | -3.47123300 | -6.16289900 | -5.36771400 |
| H | -4.84766100 | -6.56287100 | 5.05090600  | H | -4.48726100 | -3.92882900 | -4.59169900 |
| H | -6.53733800 | -0.50097100 | 1.89359100  | H | -0.91112900 | -4.79430500 | -2.56115400 |
| H | -6.13618600 | -1.78024600 | 0.77355200  | H | -4.10894900 | -2.08629300 | -2.88193200 |
| H | -5.07065900 | -1.38314800 | 2.08078100  | H | -4.49484800 | 0.98795600  | 9.55256200  |
| H | 4.78103300  | -3.16708800 | 2.19919700  | H | -3.16515000 | 0.05115200  | 10.24434000 |
| H | 5.84977100  | -4.51908100 | 2.34533700  | H | -2.37059500 | 0.56297200  | 2.56968300  |
| H | 3.73162300  | -2.87697200 | -0.02603000 | H | -2.89985800 | 2.71338700  | 8.66007300  |
| H | 4.91229800  | -2.91523000 | -1.31846800 | H | -1.22850200 | 1.32684200  | 10.55079500 |
| H | 7.31347300  | -4.81027500 | 0.46615600  | H | -3.79673900 | 2.17255800  | 3.64162400  |
| H | 6.59619200  | -4.43975300 | -2.27336400 | H | -4.15548600 | 0.49640700  | 4.14032500  |
| H | 7.20284100  | -5.96115400 | -1.54144300 | H | -3.23594600 | 1.54377500  | 5.23751600  |
| H | 6.07665500  | -2.75589200 | -5.23960000 | H | 0.22679900  | -0.40363600 | 4.56034200  |
| H | 7.22080500  | -3.75703800 | -6.17393300 | H | -1.82309400 | -0.27895500 | 5.34481000  |
| H | 8.51089100  | -1.54458700 | -3.01412500 | H | -2.38847300 | -1.20414300 | 3.92420400  |
| H | 6.78779300  | -1.97090500 | -3.22592500 | H | -0.91566300 | 2.26607000  | 4.52891500  |
| H | 9.48066500  | -3.47399100 | -5.84747000 | H | -0.21631600 | 1.50347900  | 3.06645200  |
| H | 11.35215300 | -3.24860500 | -4.41744600 | H | -1.50338200 | 2.73310400  | 2.89753800  |
| H | 10.37151600 | -2.42617400 | -3.20233500 | H | -5.48701500 | 0.25684300  | -0.47511400 |
| H | -7.55574400 | 7.44895000  | -2.69296000 | H | -4.97894700 | 1.05384000  | 1.02433700  |
| H | -7.98446600 | 5.78467600  | -3.00322700 | H | -5.76097600 | 1.06751700  | -4.56151400 |
| H | -6.66316900 | 7.81786000  | -0.63076600 | H | -5.39752200 | 0.33584800  | -6.11876700 |
| H | -5.58296500 | 4.16286500  | -2.63996700 | H | -3.29251400 | 1.83783400  | -6.22361500 |
| H | -4.27211700 | 3.47089400  | -0.65924700 | H | -3.57508500 | 2.22158000  | -4.53237100 |
| H | -5.39020400 | 7.11352100  | 1.35250500  | H | -1.27755300 | -0.45982400 | -4.03418300 |
| H | -4.12852800 | 5.41735900  | 2.28184000  | H | -1.52375000 | 1.25098300  | -3.94854400 |
| H | -0.30581200 | 4.11715700  | -5.14129000 | H | 2.48647400  | -0.94847300 | -3.92573100 |
| H | 2.03618700  | 4.67974200  | -4.54823100 | H | 3.27536800  | -0.71957100 | -2.35240200 |
| H | -2.20358700 | 4.86934900  | -3.70280500 | O | 2.03448300  | -2.28600400 | -0.14081900 |
| H | 2.55072200  | 6.02676600  | -2.52793200 | H | 10.79707700 | -1.60036500 | -4.71884100 |
| H | -1.42302000 | 7.63093000  | 0.39624500  | H | 5.47038700  | -5.58792800 | -1.53609800 |
| H | -2.70974700 | 6.31413200  | -1.31682400 | H | 2.07385400  | 8.27081700  | -0.79982200 |
| H | 2.25834400  | 6.97118600  | 0.36612100  | H | 2.01338500  | 3.04253200  | 7.33654700  |

|                                     |             |             |             |   |             |             |             |
|-------------------------------------|-------------|-------------|-------------|---|-------------|-------------|-------------|
| H                                   | 2.95160600  | 2.28901800  | 6.03788500  | C | -4.38258000 | -2.78518200 | 2.92441600  |
| H                                   | 0.06107600  | 2.02963300  | 8.07988900  | C | -4.07681100 | -2.14222600 | 1.55982700  |
| H                                   | -0.78716600 | 0.82643800  | 7.20255300  | C | -2.69319400 | -2.56236400 | 1.07111700  |
| O                                   | -0.40769900 | -0.79351400 | 3.90775100  | O | -1.69738500 | -1.80527400 | 1.47742600  |
| C                                   | 5.51958900  | 0.83984200  | 3.36724700  | O | -2.52783800 | -3.56543500 | 0.39489200  |
| C                                   | 6.58529900  | 0.56566800  | 2.32936500  | C | -3.37415700 | -7.75505700 | -3.14983900 |
| C                                   | 6.31986500  | 0.72518700  | 0.95670500  | C | -2.59578700 | -7.23249600 | -1.92627600 |
| C                                   | 7.88305900  | 0.17468000  | 2.69202500  | C | -1.34049000 | -6.43746500 | -2.29949600 |
| C                                   | 7.29873900  | 0.50584300  | -0.01217800 | C | -0.32422300 | -6.29228000 | -1.16800500 |
| C                                   | 8.87544800  | -0.05593100 | 1.73291900  | O | -0.27861200 | -7.04900600 | -0.20700900 |
| C                                   | 8.58685800  | 0.10876000  | 0.37262100  | N | 0.58781000  | -5.29216500 | -1.34220000 |
| O                                   | 9.51286400  | -0.11828300 | -0.60998400 | C | -3.73116700 | 0.98944600  | 8.70837300  |
| H                                   | 10.38394000 | -0.20289000 | -0.21026700 | C | -3.98018600 | 1.34583100  | 7.24205600  |
| H                                   | 9.87624700  | -0.36065500 | 2.05066400  | C | -2.80746500 | 2.05258900  | 6.56154000  |
| H                                   | 7.07339400  | 0.64496000  | -1.06916000 | O | -1.68173200 | 2.08872500  | 7.09129400  |
| H                                   | 8.13437400  | 0.04529600  | 3.74694200  | N | -3.05105700 | 2.58542000  | 5.36203400  |
| H                                   | 5.32312100  | 1.03206300  | 0.63264100  | C | 2.31222600  | -6.29978300 | 5.66228600  |
| H                                   | 5.38770000  | 1.92218200  | 3.52021900  | C | 2.12280000  | -6.61327000 | 4.16430400  |
| H                                   | 5.77798700  | 0.40193900  | 4.34003600  | C | 1.31124500  | -5.58255900 | 3.42369800  |
| H                                   | 4.54184000  | 0.43753600  | 3.06672400  | N | 0.34621600  | -5.89024100 | 2.48060000  |
|                                     |             |             |             | C | 1.31558700  | -4.20689900 | 3.47265700  |
|                                     |             |             |             | C | -0.19163700 | -4.74596000 | 2.01426600  |
|                                     |             |             |             | N | 0.37058900  | -3.70167600 | 2.60106400  |
|                                     |             |             |             | C | 8.45222000  | 0.37567600  | 2.08317500  |
|                                     |             |             |             | N | 7.79738900  | 1.68665300  | 1.96637200  |
|                                     |             |             |             | C | 6.46413300  | 1.83080300  | 1.78819700  |
|                                     |             |             |             | N | 5.76650900  | 0.88143700  | 1.20145200  |
|                                     |             |             |             | N | 5.87125900  | 2.96054900  | 2.23023300  |
|                                     |             |             |             | C | 11.81505800 | 0.44762900  | -2.40157600 |
|                                     |             |             |             | N | 11.31392000 | -0.80463600 | -1.84803200 |
|                                     |             |             |             | C | 10.00410200 | -1.11649000 | -1.68954300 |
|                                     |             |             |             | N | 9.04979500  | -0.21630100 | -1.90632700 |
|                                     |             |             |             | N | 9.65168900  | -2.33422900 | -1.27602200 |
|                                     |             |             |             | C | -6.24443500 | -5.50509700 | -5.95676100 |
|                                     |             |             |             | C | -7.10564900 | -4.54502100 | -5.10925800 |
|                                     |             |             |             | C | -6.32436100 | -3.56360400 | -4.25639800 |
|                                     |             |             |             | C | -5.52053500 | -4.01748500 | -3.19416200 |
|                                     |             |             |             | C | -6.37182200 | -2.17892500 | -4.47112900 |
|                                     |             |             |             | C | -4.77521700 | -3.14709800 | -2.40634800 |
|                                     |             |             |             | C | -5.64223000 | -1.28118400 | -3.67627200 |
|                                     |             |             |             | C | -4.82121000 | -1.76027200 | -2.64073100 |
|                                     |             |             |             | O | -4.05910400 | -0.97466400 | -1.85825800 |
|                                     |             |             |             | C | 3.05542300  | -1.39189900 | 1.04796700  |
|                                     |             |             |             | C | 4.77686700  | -2.10724100 | -0.72345500 |
| <b><sup>5</sup>TS<sub>6-8</sub></b> |             |             |             |   |             |             |             |
| C                                   | -1.38980700 | 2.18508300  | -7.47223100 |   |             |             |             |
| C                                   | -1.69928000 | 0.92526600  | -6.71298000 |   |             |             |             |
| C                                   | -2.93232400 | 0.47470100  | -6.29660000 |   |             |             |             |
| C                                   | -0.75771300 | -0.10783900 | -6.34324400 |   |             |             |             |
| N                                   | -2.81865100 | -0.76356700 | -5.69945700 |   |             |             |             |
| C                                   | -1.50051200 | -1.14975500 | -5.71297600 |   |             |             |             |
| C                                   | 0.63633100  | -0.26279500 | -6.49355200 |   |             |             |             |
| C                                   | -0.89022200 | -2.32312700 | -5.24268400 |   |             |             |             |
| C                                   | 1.24513800  | -1.42372400 | -6.02500900 |   |             |             |             |
| C                                   | 0.48737500  | -2.44565800 | -5.40786200 |   |             |             |             |
| C                                   | -0.23573700 | 8.48361800  | 0.69671200  |   |             |             |             |
| C                                   | -0.79760200 | 7.30571600  | -0.11852900 |   |             |             |             |
| C                                   | -0.75614100 | 5.96723300  | 0.62175100  |   |             |             |             |
| O                                   | 0.17917400  | 5.18316300  | 0.46534800  |   |             |             |             |
| N                                   | -1.79190600 | 5.72558800  | 1.45502100  |   |             |             |             |
| C                                   | -1.03534300 | -2.58190600 | 7.95263200  |   |             |             |             |
| C                                   | -1.05452400 | -1.14792800 | 7.43424200  |   |             |             |             |
| C                                   | -0.50271600 | -0.92097000 | 6.06366100  |   |             |             |             |
| N                                   | -0.27769500 | 0.35473100  | 5.58073600  |   |             |             |             |
| C                                   | -0.25088300 | -1.75954700 | 5.00995100  |   |             |             |             |
| C                                   | 0.06465900  | 0.27024100  | 4.28877300  |   |             |             |             |
| N                                   | 0.10810500  | -1.00462100 | 3.90671600  |   |             |             |             |



|    |             |             |             |   |             |             |             |
|----|-------------|-------------|-------------|---|-------------|-------------|-------------|
| C  | 6.29529200  | -1.97490100 | -0.88806100 | H | 8.59259000  | -0.10501800 | 1.11046000  |
| O  | 1.99334200  | -2.08704200 | 1.17223000  | H | 9.41927400  | 0.51214900  | 2.57713800  |
| O  | 6.78784200  | -0.82286700 | -0.60220000 | H | 8.63233700  | -2.61385100 | -1.26896200 |
| O  | 6.97338200  | -2.93606300 | -1.28088400 | H | 10.35358100 | -3.01838700 | -1.03590100 |
| C  | -3.72231900 | 2.84413700  | 2.22467200  | H | 9.24877400  | 0.68441000  | -2.31282600 |
| N  | -4.14880200 | 1.70942000  | -1.39317300 | H | 8.10210700  | -0.40664000 | -1.48889200 |
| O  | -2.53065600 | 3.19243900  | 2.48583200  | H | 11.95946500 | -1.58346400 | -1.85993200 |
| C  | -4.18307100 | 2.99486900  | 0.74788100  | H | 12.84226200 | 0.60077900  | -2.05114100 |
| N  | -0.61360000 | 1.58896400  | -0.79334200 | H | 11.22081500 | 1.29660200  | -2.04834400 |
| O  | -4.56023000 | 2.38808000  | 3.01792400  | H | -7.77690500 | -3.98538100 | -5.77809000 |
| C  | -3.70860700 | 1.87558400  | -0.16643900 | H | -7.76528300 | -5.14166200 | -4.45705000 |
| C  | 0.65321600  | 2.32220300  | -1.12261500 | H | -7.00119700 | -1.77830300 | -5.26974100 |
| C  | -0.99227600 | 0.64678000  | -1.88581100 | H | -5.48534100 | -5.08365500 | -2.96757400 |
| C  | -1.64979300 | 2.55816700  | -0.43409000 | H | -4.15407600 | -3.51661100 | -1.59149200 |
| Fe | 0.12735100  | -1.61156000 | 1.92176500  | H | -5.72279900 | -0.20700100 | -3.85360300 |
| C  | 4.34318900  | -2.17125000 | 0.76714500  | H | -4.23359300 | -0.00373400 | -1.93123700 |
| H  | 4.21352400  | -3.21477800 | 1.07598500  | H | 0.99060000  | -3.35359900 | -5.06938600 |
| H  | 5.12093900  | -1.73567100 | 1.40919600  | H | 2.32137300  | -1.55809800 | -6.14827900 |
| H  | -6.89794000 | -6.12604200 | -6.53629600 | H | -1.47989800 | -3.11295800 | -4.77794500 |
| H  | -5.60106100 | -4.95870300 | -6.61379900 | H | 1.23123000  | 0.51238500  | -6.97981700 |
| H  | -5.62346000 | -6.15598000 | -5.32988100 | H | -3.90602400 | 0.94671400  | -6.39767300 |
| H  | -2.65373100 | -8.23256100 | -3.78101000 | H | -3.58374100 | -1.27699000 | -5.27957800 |
| H  | -4.08254900 | -8.47944500 | -2.80631900 | H | -0.70179700 | 2.84292500  | -6.91870700 |
| H  | -3.87715100 | -6.96389500 | -3.71370200 | H | -2.30022500 | 2.75783800  | -7.69081900 |
| H  | -0.15997000 | 9.33547800  | 0.05110400  | H | -4.19349200 | 0.44089800  | 6.64734700  |
| H  | 0.73801800  | 8.24261000  | 1.07413900  | H | -4.88026200 | 1.97144900  | 7.14158200  |
| H  | -0.88168300 | 8.74336700  | 1.54633600  | H | -2.29155600 | 2.98214900  | 4.81724300  |
| H  | 1.38105500  | -6.36612700 | 6.18506200  | H | -3.87867100 | 2.41971400  | 4.77073200  |
| H  | 2.72220400  | -5.31929600 | 5.78674300  | H | -2.09239900 | -0.79160000 | 7.41591400  |
| H  | 3.00806400  | -7.02000200 | 6.11327800  | H | -0.53291400 | -0.48858500 | 8.14273200  |
| H  | -1.50344100 | -3.28869600 | 7.29964900  | H | -0.33764700 | -2.83702900 | 4.96253400  |
| H  | -0.04551200 | -2.91397000 | 8.18676600  | H | -0.55634500 | 1.20822100  | 6.11036600  |
| H  | -1.59791000 | -2.61722200 | 8.89665000  | H | 0.23362700  | 1.12051900  | 3.63776200  |
| H  | -3.61064200 | 1.88186800  | 9.28707700  | H | 3.10948700  | -6.70692800 | 3.68040800  |
| H  | -4.54943500 | 0.42048400  | 9.09754500  | H | 1.64113200  | -7.59534500 | 4.04701500  |
| H  | -2.81477700 | 0.40791600  | 8.83753700  | H | 0.14345700  | -6.79283400 | 2.05957000  |
| H  | -5.41941800 | -2.72398500 | 3.18269200  | H | 1.93884000  | -3.55591900 | 4.07588100  |
| H  | -4.07850200 | -3.81133200 | 2.91539700  | H | -0.97616200 | -4.69300000 | 1.26216300  |
| H  | -3.81525800 | -2.28375700 | 3.72067900  | H | -5.27926100 | 2.97561600  | 0.72288100  |
| H  | 4.93347500  | 3.19309000  | 1.93401800  | H | -3.86993000 | 3.96937200  | 0.34602200  |
| H  | 6.31298900  | 3.56285100  | 2.90919600  | H | -0.35852500 | 0.99135600  | 0.07331300  |
| H  | 4.73955400  | 0.79824400  | 1.25437900  | H | -3.33255500 | 0.96987700  | 0.32356900  |
| H  | 6.21285200  | 0.19677600  | 0.53677000  | H | -4.64112000 | 2.54416300  | -1.72439300 |
| H  | 8.33000800  | 2.51618400  | 2.18873200  | H | -0.14125700 | -0.01095000 | -2.08460300 |

|   |             |             |             |    |             |             |             |
|---|-------------|-------------|-------------|----|-------------|-------------|-------------|
| H | -1.85115000 | 0.04776400  | -1.57970800 | 58 |             |             |             |
| H | -1.24208900 | 1.21031000  | -2.78927400 | C  | 1.54937500  | 7.69448700  | -0.06650900 |
| H | 1.31425200  | 0.30767900  | 1.17282300  | C  | 0.57843600  | 6.79142000  | -0.77503300 |
| H | -1.81918100 | 3.30422800  | -1.21151400 | C  | -0.79606700 | 6.81091700  | -0.70065400 |
| H | -1.58715700 | 2.89807600  | 0.60436800  | C  | 0.90631800  | 5.79449100  | -1.77009700 |
| H | 0.53843400  | 2.82176000  | -2.09107200 | N  | -1.33948900 | 5.89802100  | -1.58373600 |
| H | 0.83203000  | 3.07396900  | -0.34787000 | C  | -0.32366000 | 5.26450300  | -2.25827300 |
| H | 1.47131800  | 1.59634300  | -1.16906100 | C  | 2.11648100  | 5.30604400  | -2.30528400 |
| H | -4.80158700 | -2.48248300 | 0.81181800  | C  | -0.36843300 | 4.28540400  | -3.26246900 |
| H | -4.14627000 | -1.05203200 | 1.63694600  | C  | 2.07558800  | 4.32569300  | -3.29295200 |
| H | -3.23728800 | -6.62263000 | -1.27414100 | C  | 0.84340100  | 3.82347200  | -3.77065700 |
| H | -2.27795800 | -8.09219000 | -1.31888600 | C  | 3.25319500  | 1.39755700  | 8.00701500  |
| H | -0.80018900 | -6.95148700 | -3.11435700 | C  | 2.44025200  | 2.09176300  | 6.89773200  |
| H | -1.60250500 | -5.44428000 | -2.69121200 | C  | 1.62473100  | 1.14294600  | 6.01252400  |
| H | 1.27230300  | -5.12094900 | -0.61822800 | O  | 2.10173300  | 0.67150500  | 4.98109900  |
| H | 0.45959800  | -4.57575500 | -2.04110500 | N  | 0.37331300  | 0.86365900  | 6.44037700  |
| H | 4.42726800  | -2.99796900 | -1.25877400 | C  | -4.50489400 | -7.18974500 | 1.54118100  |
| H | 4.33145600  | -1.22515500 | -1.20575200 | C  | -3.69628700 | -6.40436500 | 2.56697000  |
| O | 3.10839500  | -0.14513600 | 1.13553300  | C  | -2.71067200 | -5.41597000 | 2.03054600  |
| H | 11.81573800 | 0.40664300  | -3.47086500 | N  | -1.84834600 | -4.74415900 | 2.87725200  |
| H | 7.81693800  | -0.23117600 | 2.69413500  | C  | -2.51651100 | -4.85757700 | 0.79386800  |
| H | -0.92274200 | 1.92935000  | -8.40038600 | C  | -1.20219400 | -3.80572000 | 2.17559700  |
| H | -1.82749600 | 7.52952000  | -0.43884200 | N  | -1.57286700 | -3.85012700 | 0.89626100  |
| H | -0.19871400 | 7.17229000  | -1.02913800 | C  | -6.07476300 | -1.42224000 | 0.64588600  |
| H | -2.55351200 | 6.38499700  | 1.52201300  | C  | -5.17801900 | -0.17879500 | 0.63568400  |
| H | -1.92295800 | 4.80828800  | 1.91615400  | C  | -3.79834700 | -0.28241700 | -0.01764500 |
| O | 0.35066200  | 0.13616800  | 1.19232000  | O  | -3.23811500 | -1.46988000 | 0.01662600  |
| C | 4.16346400  | 6.46075600  | -1.37151400 | O  | -3.24472100 | 0.69083100  | -0.50737800 |
| C | 5.39391100  | 5.66709300  | -1.75252900 | C  | -5.89890900 | 2.43962000  | -6.25818500 |
| C | 5.33640700  | 4.28247600  | -1.98721400 | C  | -5.33961800 | 1.20701000  | -5.53220700 |
| C | 6.63823800  | 6.29555600  | -1.92644000 | C  | -3.84313300 | 1.29861400  | -5.22403300 |
| C | 6.46015600  | 3.55088800  | -2.38011000 | C  | -3.20957900 | -0.03857700 | -4.83478700 |
| C | 7.77312800  | 5.58026600  | -2.31686000 | O  | -3.72058000 | -1.11731400 | -5.09584100 |
| C | 7.68888400  | 4.20057200  | -2.54916000 | N  | -1.98719800 | 0.05448200  | -4.23292500 |
| O | 8.77324400  | 3.45544100  | -2.92930100 | C  | -5.32616400 | -5.96718400 | 5.83358900  |
| H | 9.48950900  | 4.04820900  | -3.17710400 | C  | -4.99111900 | -4.48161500 | 5.67695700  |
| H | 8.72562300  | 6.10151600  | -2.44356900 | C  | -3.49587700 | -4.17172200 | 5.60551100  |
| H | 6.38699900  | 2.47926700  | -2.56593500 | O  | -2.65786300 | -5.07463600 | 5.42775100  |
| H | 6.73053300  | 7.37056700  | -1.75836800 | N  | -3.15155700 | -2.88480300 | 5.70525300  |
| H | 4.38606800  | 3.75726000  | -1.87109700 | C  | -2.78939200 | -7.34883300 | -3.68441400 |
| H | 3.72824700  | 6.95479400  | -2.25446100 | C  | -2.68496100 | -6.03263300 | -4.47510000 |
| H | 4.40189900  | 7.25011200  | -0.64531900 | C  | -2.75434100 | -4.82406100 | -3.58929800 |
| H | 3.38054400  | 5.82782700  | -0.93543300 | N  | -3.82986700 | -3.95762200 | -3.53216000 |
|   |             |             |             | C  | -1.88988600 | -4.36659600 | -2.62553200 |

|    |             |             |             |   |             |             |             |
|----|-------------|-------------|-------------|---|-------------|-------------|-------------|
| C  | -3.59386900 | -3.03273400 | -2.58009100 | H | -5.34292100 | 2.60022500  | -7.15843100 |
| N  | -2.42660000 | -3.25961700 | -2.00339900 | H | -6.92530800 | 2.25974400  | -6.50064600 |
| C  | 6.45231000  | -5.16777100 | -1.46953900 | H | -5.83446400 | 3.34455000  | -5.64264100 |
| N  | 6.53883800  | -4.49635700 | -0.16360400 | H | 3.88573600  | 2.13003000  | 8.46685500  |
| C  | 5.54047700  | -3.74840000 | 0.36028500  | H | 3.86192600  | 0.61452400  | 7.60076100  |
| N  | 4.66078800  | -3.16417300 | -0.42680600 | H | 2.60235200  | 0.96305200  | 8.77807400  |
| N  | 5.46457600  | -3.62271800 | 1.70245800  | H | -3.74657000 | -7.44978100 | -3.21708600 |
| C  | 10.52847100 | -2.53871200 | -4.28019400 | H | -2.02172500 | -7.40545700 | -2.94116000 |
| N  | 9.37193700  | -3.10433600 | -4.96466900 | H | -2.66283300 | -8.20574300 | -4.36183400 |
| C  | 8.08215100  | -2.77209200 | -4.71160800 | H | -5.05261300 | -6.57960100 | 0.85353700  |
| N  | 7.76131500  | -1.99413300 | -3.68226500 | H | -3.88625600 | -7.87260800 | 0.99727700  |
| N  | 7.10286000  | -3.25333200 | -5.47822500 | H | -5.24711100 | -7.80121900 | 2.07346800  |
| C  | -6.52447100 | 6.59460400  | -4.38093000 | H | -4.96561300 | -6.32900800 | 6.77420900  |
| C  | -7.12982800 | 6.55550100  | -2.95521600 | H | -6.38537900 | -6.10814400 | 5.77994500  |
| C  | -6.53347400 | 5.65152900  | -1.89456700 | H | -4.85648300 | -6.57676600 | 5.05717500  |
| C  | -7.17474900 | 4.45252100  | -1.53689400 | H | -6.99090500 | -1.21759000 | 1.16002400  |
| C  | -5.40779200 | 6.02069200  | -1.14007000 | H | -6.29186000 | -1.76744800 | -0.34359600 |
| C  | -6.73545500 | 3.66974300  | -0.47217300 | H | -5.58147100 | -2.24804300 | 1.17612000  |
| C  | -4.94727200 | 5.24165700  | -0.07178500 | H | 4.87846400  | -2.91050100 | 2.11569100  |
| C  | -5.61558600 | 4.05590000  | 0.28529300  | H | 5.94410900  | -4.25613800 | 2.32514200  |
| O  | -5.26909900 | 3.29255900  | 1.33587200  | H | 3.76399700  | -2.78082500 | -0.09751500 |
| C  | 1.34577000  | -2.40230700 | -1.47020200 | H | 4.89301600  | -2.90920100 | -1.42443600 |
| C  | 2.97688500  | -1.67796000 | -3.32757700 | H | 7.31663100  | -4.71876300 | 0.44211100  |
| C  | 4.35038600  | -2.13647000 | -3.82913600 | H | 6.61188000  | -4.47439600 | -2.30048500 |
| O  | 0.08292600  | -2.32488500 | -1.64508500 | H | 7.19896500  | -5.96720800 | -1.49842000 |
| O  | 5.22553600  | -2.36656200 | -2.91522200 | H | 6.11545100  | -2.89867200 | -5.35400000 |
| O  | 4.57457600  | -2.26191500 | -5.04189800 | H | 7.30624700  | -3.89668100 | -6.22857800 |
| C  | -2.83593000 | 0.19591800  | 4.76762400  | H | 8.46347500  | -1.53442000 | -3.12412100 |
| N  | -2.65556100 | 3.23645500  | 2.46835300  | H | 6.76192400  | -2.02077800 | -3.35175500 |
| O  | -1.70798400 | -0.36595800 | 4.87194900  | H | 9.55450400  | -3.52701300 | -5.86554000 |
| C  | -2.84009400 | 1.69123800  | 4.30630100  | H | 11.37035900 | -3.23319900 | -4.38167700 |
| N  | -0.05790600 | 1.42500600  | 1.61522400  | H | 10.33204700 | -2.42096200 | -3.20969700 |
| O  | -3.95255600 | -0.29629700 | 5.00302000  | H | -7.12618300 | 7.58808800  | -2.56841200 |
| C  | -2.22548500 | 1.92742600  | 2.89035300  | H | -8.19445100 | 6.29396800  | -3.05524800 |
| C  | 1.42427000  | 1.40985000  | 1.77490000  | H | -4.90369000 | 6.96631000  | -1.35834100 |
| C  | -0.47960100 | 2.29525700  | 0.48381400  | H | -8.06419600 | 4.13581800  | -2.08712800 |
| C  | -0.70395500 | 1.73375400  | 2.93617500  | H | -7.26971700 | 2.76166500  | -0.19392800 |
| Fe | -1.49546400 | -2.18222500 | -0.32468900 | H | -4.09829300 | 5.57579500  | 0.52664400  |
| C  | 2.16378400  | -2.83691200 | -2.69097300 | H | -4.34997400 | 3.44836600  | 1.64552200  |
| H  | 1.49821600  | -3.28083900 | -3.43973100 | H | 0.84211100  | 3.07030900  | -4.56080600 |
| H  | 2.84070900  | -3.63077300 | -2.34533700 | H | 3.00624200  | 3.94694400  | -3.71939700 |
| H  | -7.20827800 | 7.23396900  | -4.90187100 | H | -1.32069500 | 3.91421100  | -3.64105900 |
| H  | -5.55105100 | 7.03861100  | -4.38597600 | H | 3.07390600  | 5.69729000  | -1.95695700 |
| H  | -6.49442400 | 5.61053300  | -4.85889900 | H | -1.44234100 | 7.43196500  | -0.08611300 |

|   |             |             |             |                                |             |             |             |
|---|-------------|-------------|-------------|--------------------------------|-------------|-------------|-------------|
| H | -2.32551700 | 5.71224000  | -1.69640900 | H                              | 2.07409300  | 8.27068900  | -0.79975100 |
| H | 2.29164000  | 7.13011100  | 0.51807100  | H                              | 1.78049000  | 2.85243300  | 7.34408400  |
| H | 1.03653800  | 8.38538600  | 0.61457300  | H                              | 3.12635900  | 2.62037100  | 6.22229600  |
| H | -5.44094400 | -4.07179700 | 4.75617600  | H                              | 0.00706200  | 1.30056200  | 7.27354000  |
| H | -5.43623900 | -3.89616500 | 6.49590000  | H                              | -0.28518700 | 0.30705200  | 5.87265300  |
| H | -2.18524400 | -2.60781700 | 5.56161100  | O                              | -0.40157500 | -1.10412000 | 0.78789200  |
| H | -3.78318600 | -2.07643600 | 5.60938200  | C                              | 6.34121300  | 1.33872600  | 3.74877700  |
| H | -4.38410600 | -5.83920400 | 3.20925600  | C                              | 7.18243700  | 0.89305800  | 2.57326700  |
| H | -3.17372100 | -7.09999100 | 3.23967100  | C                              | 6.61874000  | 0.71744300  | 1.29633400  |
| H | -3.00628000 | -5.08669900 | -0.14384500 | C                              | 8.56348800  | 0.67692900  | 2.69958800  |
| H | -1.87078100 | -4.86575800 | 3.91357500  | C                              | 7.38953200  | 0.34783400  | 0.19256600  |
| H | -0.51868600 | -3.07929600 | 2.60116000  | C                              | 9.35110000  | 0.30316600  | 1.60612700  |
| H | -1.73556400 | -6.00947600 | -5.03098100 | C                              | 8.76694400  | 0.13853400  | 0.34404000  |
| H | -3.47839000 | -5.97992600 | -5.23473300 | O                              | 9.49324600  | -0.22994800 | -0.75712000 |
| H | -4.59840000 | -3.91753900 | -4.18917800 | H                              | 10.43040600 | -0.18326100 | -0.54438200 |
| H | -0.92646400 | -4.77000600 | -2.33728500 | H                              | 10.42403100 | 0.14370600  | 1.74163200  |
| H | -4.27118100 | -2.22195900 | -2.34685000 | H                              | 6.93066900  | 0.22866500  | -0.78874400 |
| H | -3.87458700 | 2.04247200  | 4.28667400  | H                              | 9.04488300  | 0.80558300  | 3.67111800  |
| H | -2.29142500 | 2.29774400  | 5.04233800  | H                              | 5.54897900  | 0.88448900  | 1.15291300  |
| H | -0.32229200 | 0.42296800  | 1.34216600  | H                              | 6.18081100  | 2.42818400  | 3.72320000  |
| H | -2.66264800 | 1.18960800  | 2.20475800  | H                              | 6.82731000  | 1.10499500  | 4.70478700  |
| H | -2.13519900 | 3.94064400  | 3.00751100  | H                              | 5.34962900  | 0.86780100  | 3.75201000  |
| H | 0.09785900  | 2.01421900  | -0.40121900 |                                |             |             |             |
| H | -1.53997900 | 2.13271700  | 0.27402900  | <sup>5</sup> TS <sub>8-9</sub> |             |             |             |
| H | -0.28271200 | 3.34363600  | 0.72749700  | C                              | -6.59992400 | -2.57177800 | -2.38615200 |
| H | 0.51921400  | -1.37901200 | 0.60191800  | C                              | -5.53063400 | -1.03612800 | -3.91157200 |
| H | -0.21283100 | 2.62811800  | 3.34644300  | C                              | -5.88707500 | -1.37924700 | -2.59522700 |
| H | -0.48940300 | 0.88215300  | 3.59224400  | O                              | -5.62023500 | -0.61240900 | -1.51975600 |
| H | 1.78731400  | 2.43806000  | 1.88759300  | C                              | 2.96485700  | -1.57464700 | 1.02441800  |
| H | 1.68210300  | 0.83979300  | 2.67369700  | C                              | 4.74108400  | -2.27411900 | -0.69635200 |
| H | 1.87169800  | 0.95789400  | 0.88451600  | C                              | 6.26759800  | -2.17722500 | -0.79470400 |
| H | -5.67616800 | 0.67529500  | 0.16583800  | O                              | 1.88333500  | -2.24510400 | 1.09548700  |
| H | -4.98850400 | 0.12895700  | 1.67472800  | O                              | 6.77785400  | -1.05803000 | -0.42351600 |
| H | -5.89154600 | 1.03357700  | -4.59478100 | O                              | 6.93501600  | -3.13314300 | -1.21766200 |
| H | -5.50711900 | 0.31333600  | -6.15030100 | C                              | -3.80334200 | 2.61697100  | 2.22003100  |
| H | -3.29300800 | 1.64815200  | -6.11538000 | N                              | -3.43049100 | 1.27710500  | -1.38902000 |
| H | -3.65049700 | 2.04511100  | -4.43781800 | O                              | -2.68116500 | 3.09899600  | 2.55177300  |
| H | -1.55311700 | -0.79666900 | -3.90150100 | C                              | -4.07570800 | 2.45558200  | 0.69078200  |
| H | -1.66996600 | 0.92017900  | -3.82363300 | N                              | -0.58600800 | 1.65036800  | -0.77705500 |
| H | 2.41424600  | -1.22981400 | -4.15526300 | O                              | -4.72326700 | 2.26058400  | 2.97691500  |
| H | 3.16088400  | -0.89574000 | -2.57705100 | C                              | -2.97103500 | 1.68686300  | -0.05644400 |
| O | 1.93465300  | -2.15575200 | -0.39705600 | C                              | 0.64794700  | 2.45678800  | -1.01305200 |
| H | 10.79711600 | -1.60037300 | -4.71883600 | C                              | -1.01214700 | 0.90950000  | -1.98096500 |
| H | 5.47038600  | -5.58792600 | -1.53610200 | C                              | -1.67738400 | 2.49364700  | -0.16969300 |

|    |             |             |             |   |             |             |             |
|----|-------------|-------------|-------------|---|-------------|-------------|-------------|
| Fe | -0.01065700 | -1.73910700 | 1.76342300  | H | -5.01029100 | -0.09513400 | -4.09683200 |
| C  | 4.24153200  | -2.38137300 | 0.77048600  | H | -4.88021800 | 0.01593800  | -1.65068700 |
| H  | 4.06842600  | -3.43132500 | 1.03266600  | H | 2.13644300  | -1.91864900 | -4.20566200 |
| H  | 5.00295100  | -1.99436200 | 1.46135400  | H | 3.18553100  | 0.13272700  | -5.12732200 |
| H  | -6.80337800 | -5.34942000 | -7.37697400 | H | -0.32213300 | -2.30709600 | -4.43062400 |
| H  | -5.46459800 | -4.22991600 | -7.30560000 | H | 1.82444400  | 1.84186200  | -6.30632000 |
| H  | -5.61710900 | -5.49264600 | -6.07092000 | H | -3.27382800 | 0.99293800  | -6.76028400 |
| H  | -2.77414100 | -7.81504600 | -4.59684100 | H | -2.64674100 | -1.08533200 | -5.49198000 |
| H  | -4.25649600 | -8.07875800 | -3.71048000 | H | -0.38873200 | 3.54768900  | -6.87900400 |
| H  | -3.96046300 | -6.50909400 | -4.48692500 | H | -1.95120700 | 3.22769100  | -7.65928800 |
| H  | 0.13656800  | 9.31244600  | 0.66771400  | H | -4.49121500 | 0.12666400  | 6.36773600  |
| H  | 0.94518800  | 8.11322200  | 1.64518000  | H | -5.20679600 | 1.60801800  | 6.96129200  |
| H  | -0.67630600 | 8.64145300  | 2.07935000  | H | -2.52303400 | 2.85844200  | 4.90273700  |
| H  | 0.83191400  | -6.84801100 | 5.65725000  | H | -4.11999700 | 2.34256100  | 4.75108800  |
| H  | 2.22635500  | -5.82653800 | 5.40167300  | H | -2.50218400 | -1.25276900 | 7.13219400  |
| H  | 2.43696100  | -7.55653200 | 5.61088500  | H | -0.98890300 | -1.06255500 | 7.98443800  |
| H  | -1.99517200 | -3.75375500 | 6.86807300  | H | -0.59601900 | -3.15951700 | 4.66253600  |
| H  | -0.57018700 | -3.50182100 | 7.84728800  | H | -0.85921000 | 0.79757600  | 6.08318200  |
| H  | -2.14460400 | -3.20061700 | 8.50511200  | H | 0.11652200  | 0.87661300  | 3.68213200  |
| H  | -4.01649700 | 1.33189900  | 9.14295400  | H | 2.65722800  | -7.07461400 | 3.21078700  |
| H  | -4.99498400 | -0.07453200 | 8.80003500  | H | 1.14380500  | -7.92934400 | 3.45361600  |
| H  | -3.25043100 | -0.13343800 | 8.61438500  | H | -0.29384800 | -6.91649600 | 1.50807700  |
| H  | -5.68377800 | -2.73622600 | 2.63004300  | H | 1.64863000  | -3.92082500 | 3.74857700  |
| H  | -4.36993400 | -3.85124800 | 2.34295600  | H | -1.26922900 | -4.71196500 | 0.82369400  |
| H  | -4.09930300 | -2.40464800 | 3.27970800  | H | -5.02027300 | 1.91943100  | 0.56025300  |
| H  | 4.92751800  | 2.86943200  | 2.28246900  | H | -4.19950600 | 3.45623500  | 0.24913100  |
| H  | 6.25527200  | 3.09975200  | 3.36558000  | H | -0.30885100 | 0.92974100  | -0.01407600 |
| H  | 4.68788000  | 0.54723900  | 1.39977300  | H | -2.75066400 | 0.76491700  | 0.50063500  |
| H  | 6.17707100  | -0.07050700 | 0.73388400  | H | -3.61060600 | 2.12604800  | -1.93849400 |
| H  | 8.27357300  | 2.03140700  | 2.68614600  | H | -0.66997900 | -0.12757600 | -1.97408400 |
| H  | 8.49398000  | -0.50914100 | 1.41013400  | H | -2.38271200 | 0.86309000  | -1.87064800 |
| H  | 9.27059300  | -0.03531400 | 2.95447400  | H | -0.80213200 | 1.44267000  | -2.91155500 |
| H  | 8.60406900  | -2.86571200 | -1.11385800 | H | 1.27316300  | 0.15175300  | 1.10072800  |
| H  | 10.30118300 | -3.32528400 | -0.81239300 | H | -1.82035000 | 3.37699400  | -0.80883400 |
| H  | 9.34907800  | 0.46463000  | -1.94703700 | H | -1.34593600 | 2.82167600  | 0.81983400  |
| H  | 8.13827300  | -0.63416200 | -1.23056600 | H | 0.46991200  | 3.17031900  | -1.82513300 |
| H  | 11.98107900 | -1.88774400 | -1.49316200 | H | 0.88189200  | 3.01449900  | -0.10127100 |
| H  | 12.91334300 | 0.28631800  | -1.48907300 | H | 1.46217500  | 1.77796800  | -1.28513400 |
| H  | 11.30605400 | 1.01359300  | -1.51192800 | H | -4.89272900 | -2.35587900 | 0.30318700  |
| H  | -7.61856900 | -3.21539500 | -6.66927200 | H | -4.32085200 | -1.00010200 | 1.28423500  |
| H  | -7.94710300 | -4.52209200 | -5.55533000 | H | -3.44858000 | -6.33105700 | -2.02934000 |
| H  | -5.65085400 | -1.54524300 | -5.99970800 | H | -2.58735900 | -7.86184300 | -2.07622500 |
| H  | -7.52024900 | -4.29485300 | -3.26528900 | H | -0.90286900 | -6.70945400 | -3.70189600 |
| H  | -6.8898300  | -2.83947400 | -1.37044800 | H | -1.62130200 | -5.18627200 | -3.18385200 |



|    |             |             |             |   |             |             |             |
|----|-------------|-------------|-------------|---|-------------|-------------|-------------|
| C  | -6.55385700 | 5.64485800  | -1.88836000 | H | -4.85675300 | -6.57706200 | 5.05728800  |
| C  | -7.17327000 | 4.41954800  | -1.58231900 | H | -6.99090500 | -1.21759000 | 1.16002400  |
| C  | -5.48117200 | 6.03500200  | -1.06994500 | H | -6.29186000 | -1.76744800 | -0.34359600 |
| C  | -6.76487900 | 3.63403100  | -0.50733100 | H | -5.58189500 | -2.24791700 | 1.17671600  |
| C  | -5.05246500 | 5.25340800  | 0.01076800  | H | 4.88447900  | -2.93356100 | 2.13207800  |
| C  | -5.69965400 | 4.04122700  | 0.31701100  | H | 5.95141800  | -4.27961000 | 2.33164100  |
| O  | -5.39037900 | 3.27471100  | 1.37647800  | H | 3.76540400  | -2.79443700 | -0.07998600 |
| C  | 1.34471000  | -2.41549800 | -1.45590600 | H | 4.89466200  | -2.91081300 | -1.40817000 |
| C  | 2.97489000  | -1.67947100 | -3.30848200 | H | 7.32085400  | -4.73088700 | 0.44317600  |
| C  | 4.34942200  | -2.13331000 | -3.81173900 | H | 6.60942200  | -4.46913300 | -2.29650600 |
| O  | 0.08224900  | -2.33151800 | -1.63407900 | H | 7.19921400  | -5.96670700 | -1.50538200 |
| O  | 5.22617900  | -2.36134300 | -2.89909200 | H | 6.11154100  | -2.89309700 | -5.34153600 |
| O  | 4.57181200  | -2.25777400 | -5.02500200 | H | 7.29968600  | -3.88849000 | -6.22254000 |
| C  | -2.87547100 | 0.23054500  | 4.62842800  | H | 8.46644100  | -1.53753700 | -3.11305100 |
| N  | -2.67078500 | 3.27883500  | 2.24702900  | H | 6.76369400  | -2.01861500 | -3.33972100 |
| O  | -1.73336700 | -0.29864200 | 4.78209400  | H | 9.54808700  | -3.52432100 | -5.86310400 |
| C  | -2.91859100 | 1.70037100  | 4.11590600  | H | 11.36894000 | -3.23442700 | -4.38486200 |
| N  | -0.03432300 | 1.37286300  | 1.56700900  | H | 10.33563700 | -2.42144900 | -3.20898000 |
| O  | -3.97852900 | -0.30244900 | 4.85639200  | H | -7.12112600 | 7.58742800  | -2.56627100 |
| C  | -2.25642800 | 1.95349400  | 2.74693900  | H | -8.19906300 | 6.30470300  | -3.05962100 |
| C  | 1.44450500  | 1.37987800  | 1.77500100  | H | -4.99963700 | 7.00150900  | -1.24393900 |
| C  | -0.42490000 | 2.11278500  | 0.38970200  | H | -8.02315200 | 4.08443000  | -2.18204600 |
| C  | -0.73725200 | 1.76613700  | 2.85841600  | H | -7.28446500 | 2.70577600  | -0.27103900 |
| Fe | -1.49474900 | -2.19209900 | -0.31837100 | H | -4.25410600 | 5.61264800  | 0.66235700  |
| C  | 2.16476900  | -2.84345100 | -2.67708900 | H | -4.46803700 | 3.40446600  | 1.70360900  |
| H  | 1.50121000  | -3.28650000 | -3.42815700 | H | 0.57987600  | 3.22286500  | -4.66033900 |
| H  | 2.84376000  | -3.63636000 | -2.33353000 | H | 2.78948000  | 4.03380700  | -3.87617600 |
| H  | -7.20827800 | 7.23396900  | -4.90187100 | H | -1.53178100 | 4.07743800  | -3.63438600 |
| H  | -5.55105100 | 7.03861100  | -4.38597600 | H | 2.95753400  | 5.73046600  | -2.06962000 |
| H  | -6.49478800 | 5.61085300  | -4.85963300 | H | -1.45062900 | 7.50178700  | 0.01313400  |
| H  | -5.34292100 | 2.60022500  | -7.15843100 | H | -2.42838900 | 5.85737000  | -1.62200800 |
| H  | -6.92530800 | 2.25974400  | -6.50064600 | H | 2.28809600  | 7.09368600  | 0.48549200  |
| H  | -5.83495300 | 3.34519900  | -5.64353900 | H | 1.07866700  | 8.38611200  | 0.64370300  |
| H  | 3.88573600  | 2.13003000  | 8.46685500  | H | -5.46681400 | -4.07076300 | 4.75966300  |
| H  | 3.86192600  | 0.61452400  | 7.60076100  | H | -5.43246300 | -3.89538300 | 6.49808400  |
| H  | 2.60485300  | 0.96145300  | 8.77950700  | H | -2.19984800 | -2.59483100 | 5.48235000  |
| H  | -3.74657000 | -7.44978100 | -3.21708600 | H | -3.79385200 | -2.05094600 | 5.48900500  |
| H  | -2.02172500 | -7.40545700 | -2.94116000 | H | -4.38899900 | -5.84439700 | 3.21301300  |
| H  | -2.66284600 | -8.20528300 | -4.36240200 | H | -3.17935600 | -7.10642100 | 3.24404900  |
| H  | -5.05261300 | -6.57960100 | 0.85353700  | H | -3.00792600 | -5.09303100 | -0.13581900 |
| H  | -3.88625600 | -7.87260800 | 0.99727700  | H | -1.87863800 | -4.86620200 | 3.92450600  |
| H  | -5.24854700 | -7.80272100 | 2.06999900  | H | -0.52935500 | -3.07783100 | 2.61244200  |
| H  | -4.96561300 | -6.32900800 | 6.77420900  | H | -1.73555500 | -6.00724500 | -5.02898300 |
| H  | -6.38537900 | -6.10814400 | 5.77994500  | H | -3.47852900 | -5.97734400 | -5.23273600 |

|   |             |             |             |                                 |             |             |             |
|---|-------------|-------------|-------------|---------------------------------|-------------|-------------|-------------|
| H | -4.60332200 | -3.92256700 | -4.17367500 | H                               | 10.44106200 | -0.20550500 | -0.52301800 |
| H | -0.92397100 | -4.77402000 | -2.33572700 | H                               | 10.44093200 | 0.10665300  | 1.76500300  |
| H | -4.27446600 | -2.23361000 | -2.32515400 | H                               | 6.94118400  | 0.21168400  | -0.75565600 |
| H | -3.96462100 | 2.00822000  | 4.03953200  | H                               | 9.06753500  | 0.75712000  | 3.70237900  |
| H | -2.44174400 | 2.34339600  | 4.87315200  | H                               | 5.56518000  | 0.85603200  | 1.19411200  |
| H | -0.29319900 | 0.34257800  | 1.35353800  | H                               | 6.21283900  | 2.38281700  | 3.77881100  |
| H | -2.64576700 | 1.21714400  | 2.03236900  | H                               | 6.84929500  | 1.04305400  | 4.74407800  |
| H | -2.40904400 | 4.00400900  | 2.91458400  | H                               | 5.36950300  | 0.82881500  | 3.78929700  |
| H | -1.31208700 | 1.76152100  | -0.13796200 |                                 |             |             |             |
| H | -2.20062100 | 3.49898800  | 1.37065600  |                                 |             |             |             |
| H | 0.13320200  | 3.00993300  | 0.13298500  | <sup>5</sup> TS <sub>9-10</sub> |             |             |             |
| H | 0.52628900  | -1.41246800 | 0.62035800  | C                               | -1.11655500 | 3.64819000  | -6.95411800 |
| H | -0.25708500 | 2.68551100  | 3.22203600  | C                               | -1.30307700 | 2.27929500  | -6.36286900 |
| H | -0.53902300 | 0.94705400  | 3.56108100  | C                               | -2.48986000 | 1.60854900  | -6.17472200 |
| H | 1.79184800  | 2.41509900  | 1.87264300  | C                               | -0.26031000 | 1.35401400  | -5.97759500 |
| H | 1.67456700  | 0.83736500  | 2.69878100  | N                               | -2.25284800 | 0.33178600  | -5.70239500 |
| H | 1.92202500  | 0.90890700  | 0.91051700  | C                               | -0.89723400 | 0.14184900  | -5.57917300 |
| H | -5.67868500 | 0.67875700  | 0.17576600  | C                               | 1.14820500  | 1.42328000  | -5.94415700 |
| H | -4.98805900 | 0.12414000  | 1.67953100  | C                               | -0.16798400 | -0.98631400 | -5.17408200 |
| H | -5.89026600 | 1.03371600  | -4.59444200 | C                               | 1.87377400  | 0.30948000  | -5.52887000 |
| H | -5.50226900 | 0.31413200  | -6.14886100 | C                               | 1.22112200  | -0.88684800 | -5.15203900 |
| H | -3.29111300 | 1.65184500  | -6.11352300 | C                               | 0.16819200  | 8.12178000  | 2.32341100  |
| H | -3.65411900 | 2.05879800  | -4.43957800 | C                               | -0.45946900 | 7.17762500  | 1.27763900  |
| H | -1.52798200 | -0.76783200 | -3.90630900 | C                               | -0.55589000 | 5.70434400  | 1.68895700  |
| H | -1.62716700 | 0.95364000  | -3.88248500 | O                               | 0.31490100  | 4.89226000  | 1.36092400  |
| H | 2.41124800  | -1.22962000 | -4.13453600 | N                               | -1.63679300 | 5.36102600  | 2.41861900  |
| H | 3.15645100  | -0.89963100 | -2.55495800 | C                               | -8.40678500 | 3.12691600  | 1.32949400  |
| O | 1.93029100  | -2.17995100 | -0.37882800 | C                               | -7.76333800 | 4.36612400  | 0.74445900  |
| H | 10.79711600 | -1.60037300 | -4.71883600 | C                               | -7.05484800 | 5.27082900  | 1.55689100  |
| H | 5.47038600  | -5.58792600 | -1.53610200 | C                               | -7.81918500 | 4.64622200  | -0.62893900 |
| H | 2.07409300  | 8.27068900  | -0.79975100 | C                               | -6.42924200 | 6.40007300  | 1.02847300  |
| H | 1.77044400  | 2.84602000  | 7.35454500  | C                               | -7.19546100 | 5.77315000  | -1.17629800 |
| H | 3.11426600  | 2.62768800  | 6.22891700  | C                               | -6.49348000 | 6.65995200  | -0.34866000 |
| H | -0.03940300 | 1.38156100  | 7.19656200  | O                               | -5.86169100 | 7.77239900  | -0.81875700 |
| H | -0.31175100 | 0.36656400  | 5.80905200  | C                               | -1.25306600 | -4.12250800 | 7.20133400  |
| O | -0.39293800 | -1.13305800 | 0.81081400  | C                               | -1.17371100 | -2.61773700 | 6.97219700  |
| C | 6.36472500  | 1.29189500  | 3.79110500  | C                               | -0.50757100 | -2.16379600 | 5.71233400  |
| C | 7.20223800  | 0.85369300  | 2.61014800  | N                               | -0.27812000 | -0.82196100 | 5.47884500  |
| C | 6.63517700  | 0.68718800  | 1.33351100  | C                               | -0.14626800 | -2.80106800 | 4.55242800  |
| C | 8.58349200  | 0.63538000  | 2.73127900  | C                               | 0.15965000  | -0.67714400 | 4.21998700  |
| C | 7.40271000  | 0.32411600  | 0.22521400  | N                               | 0.26426500  | -1.86194000 | 3.62176900  |
| C | 9.36781300  | 0.26809600  | 1.63330400  | C                               | -4.51457900 | -3.15678300 | 2.20532900  |
| C | 8.78025000  | 0.11231700  | 0.37164900  | C                               | -4.22329100 | -2.22298700 | 1.02718900  |
| O | 9.50334200  | -0.24989800 | -0.73377300 | C                               | -2.78083700 | -2.08176400 | 0.54183600  |
|   |             |             |             | O                               | -1.85339700 | -2.40180600 | 1.38969300  |



|   |             |             |             |    |             |             |             |
|---|-------------|-------------|-------------|----|-------------|-------------|-------------|
| O | -2.55028200 | -1.64682900 | -0.58827000 | C  | -3.58506300 | 2.22708600  | 2.45372300  |
| C | -3.61817600 | -6.85139900 | -4.73422100 | N  | -3.63757900 | 1.53490800  | -1.34487700 |
| C | -2.90505000 | -6.54409600 | -3.40888300 | O  | -2.43552800 | 2.66167300  | 2.77483900  |
| C | -1.76817900 | -5.52601300 | -3.53104100 | C  | -3.99279900 | 2.36606700  | 0.95691200  |
| C | -0.82393500 | -5.51580300 | -2.32652400 | N  | -0.39029900 | 1.86076400  | -0.24908500 |
| O | -0.65294300 | -6.49091500 | -1.61144300 | O  | -4.42123100 | 1.70185400  | 3.20908600  |
| N | -0.11786900 | -4.35850500 | -2.15165600 | C  | -2.99308500 | 1.73249300  | -0.03449900 |
| C | -3.80089900 | -0.65175000 | 8.63531000  | C  | 0.65710700  | 2.78323500  | -0.78640300 |
| C | -4.02071400 | -0.00087500 | 7.26406500  | C  | -0.39098500 | 0.54159800  | -0.86919000 |
| C | -2.81188800 | 0.76276200  | 6.72003500  | C  | -1.71862300 | 2.59650500  | -0.07831500 |
| O | -1.69317000 | 0.65937800  | 7.25379900  | Fe | 0.06955800  | -2.11403800 | 1.55136300  |
| N | -3.01130400 | 1.51120700  | 5.63025900  | C  | 4.20572700  | -2.32130500 | 0.23635000  |
| C | 1.96700100  | -7.45998500 | 4.24033400  | H  | 4.06255400  | -3.40396100 | 0.32471900  |
| C | 1.81513800  | -7.49366500 | 2.71053200  | H  | 4.96999900  | -2.03216500 | 0.97021800  |
| C | 1.00290100  | -6.34432100 | 2.19416300  | H  | -7.00434800 | -4.41290000 | -7.75537500 |
| N | -0.27616200 | -6.45404400 | 1.68385600  | H  | -5.65569300 | -3.31615600 | -7.58509300 |
| C | 1.25787700  | -4.99472700 | 2.19795300  | H  | -5.78203000 | -4.72167200 | -6.50883700 |
| C | -0.73761600 | -5.21815800 | 1.39712400  | H  | -2.90839500 | -7.22625900 | -5.44207000 |
| N | 0.16784000  | -4.30898100 | 1.70824200  | H  | -4.36415500 | -7.59571200 | -4.54942000 |
| C | 8.46104800  | -0.49992500 | 2.12925200  | H  | -4.10144600 | -5.96334700 | -5.15784600 |
| N | 7.89060700  | 0.84672300  | 2.30269800  | H  | 0.29334800  | 9.08103400  | 1.86270900  |
| C | 6.57845400  | 1.13716400  | 2.14939800  | H  | 1.12326800  | 7.76432200  | 2.65324600  |
| N | 5.81632700  | 0.40475900  | 1.36143500  | H  | -0.47524200 | 8.23679900  | 3.20679000  |
| N | 6.06926400  | 2.18925300  | 2.82513100  | H  | 1.02447000  | -7.58565500 | 4.73086300  |
| C | 11.90426500 | 0.31009200  | -2.21988000 | H  | 2.41777700  | -6.54467900 | 4.56276500  |
| N | 11.31125200 | -0.98927400 | -1.93123900 | H  | 2.61766300  | -8.28294500 | 4.57172700  |
| C | 9.97968200  | -1.22998100 | -1.85519800 | H  | -1.74015400 | -4.66129500 | 6.41547100  |
| N | 9.09766700  | -0.23613700 | -1.90372800 | H  | -0.28333400 | -4.54099400 | 7.37261200  |
| N | 9.53071300  | -2.47486600 | -1.69224400 | H  | -1.83462100 | -4.30897200 | 8.11345600  |
| C | -6.33472000 | -3.95254000 | -7.05721700 | H  | -3.65125200 | 0.09993900  | 9.38247100  |
| C | -7.28771200 | -3.13695100 | -6.14539500 | H  | -4.65045000 | -1.24802100 | 8.89494100  |
| C | -6.76473700 | -2.42806800 | -4.90752200 | H  | -2.91427800 | -1.29128400 | 8.64491300  |
| C | -7.10890500 | -2.88923000 | -3.62359300 | H  | -5.55214000 | -3.09965200 | 2.46172500  |
| C | -6.05170300 | -1.21846400 | -4.97283000 | H  | -4.25627900 | -4.17346400 | 1.99316200  |
| C | -6.79001500 | -2.17706700 | -2.46860200 | H  | -3.94055900 | -2.85320500 | 3.08851200  |
| C | -5.71778200 | -0.49377400 | -3.82128600 | H  | 5.16619700  | 2.56816600  | 2.57607400  |
| C | -6.09623800 | -0.95581300 | -2.54671900 | H  | 6.54366400  | 2.59157400  | 3.62026100  |
| O | -5.87061600 | -0.27897700 | -1.40754300 | H  | 4.79047300  | 0.43890200  | 1.37984400  |
| C | 2.91363500  | -1.60321300 | 0.63287400  | H  | 6.22070700  | -0.14180500 | 0.55190000  |
| C | 4.67503900  | -1.96480900 | -1.19785600 | H  | 8.47506500  | 1.56414200  | 2.70930400  |
| C | 6.20127500  | -1.92306100 | -1.30783500 | H  | 8.57755500  | -0.76374900 | 1.07403800  |
| O | 1.86048300  | -2.32561800 | 0.63257600  | H  | 9.43058200  | -0.53102400 | 2.63446900  |
| O | 6.77036800  | -0.90443000 | -0.76460400 | H  | 8.49473500  | -2.66980600 | -1.76720000 |
| O | 6.81954700  | -2.82679800 | -1.88866700 | H  | 10.17524200 | -3.24357300 | -1.58262600 |

|   |             |             |             |   |             |             |             |
|---|-------------|-------------|-------------|---|-------------|-------------|-------------|
| H | 9.36892900  | 0.70678200  | -2.13365300 | H | -2.74283100 | 0.73744700  | 0.34969800  |
| H | 8.12987600  | -0.42929500 | -1.53737300 | H | -3.92076300 | 2.43267700  | -1.73687200 |
| H | 11.90266300 | -1.79356100 | -2.09541500 | H | -1.29864700 | -0.06829700 | -0.90720700 |
| H | 12.93209500 | 0.32096500  | -1.83995600 | H | -2.99438300 | 1.11064400  | -2.01019400 |
| H | 11.35999000 | 1.11056100  | -1.70734700 | H | 0.47588900  | 0.31157400  | -1.48272100 |
| H | -6.05174200 | 7.87725200  | -1.75551800 | H | 0.95397600  | -0.04841900 | 1.06845900  |
| H | -7.26651300 | 5.96380000  | -2.25070200 | H | -1.77443900 | 3.33649000  | -0.88674300 |
| H | -5.89364800 | 7.09820700  | 1.67302400  | H | -1.61154800 | 3.10430100  | 0.88451700  |
| H | -8.36485300 | 3.97406300  | -1.29474600 | H | 0.43951600  | 2.99654300  | -1.83888900 |
| H | -6.98734400 | 5.08798000  | 2.63132200  | H | 0.63596800  | 3.69528600  | -0.17626200 |
| H | -7.66740600 | 2.32185300  | 1.44782400  | H | 1.63162400  | 2.29251700  | -0.70018500 |
| H | -9.20661600 | 2.74766100  | 0.68067600  | H | -4.82635300 | -2.47453700 | 0.14754400  |
| H | -7.78689900 | -2.38630700 | -6.78101400 | H | -4.53098500 | -1.20322200 | 1.30201900  |
| H | -8.09288200 | -3.81388500 | -5.82194500 | H | -3.63196200 | -6.18274200 | -2.66369900 |
| H | -5.79121800 | -0.79764700 | -5.94833100 | H | -2.48603800 | -7.47373300 | -2.99768600 |
| H | -7.67122500 | -3.82090100 | -3.52345900 | H | -1.13499100 | -5.76600600 | -4.40332800 |
| H | -7.09585200 | -2.54344400 | -1.48861400 | H | -2.16683600 | -4.51610600 | -3.71428000 |
| H | -5.20790400 | 0.46639100  | -3.90752300 | H | 0.47901300  | -4.29066000 | -1.33764700 |
| H | -5.12563100 | 0.36622700  | -1.46561700 | H | -0.44644300 | -3.48923000 | -2.54416100 |
| H | 1.81504000  | -1.75245600 | -4.85210600 | H | 4.27259300  | -2.68489500 | -1.92019200 |
| H | 2.96447500  | 0.35144500  | -5.50947000 | H | 4.30819700  | -0.96491900 | -1.47042700 |
| H | -0.67362900 | -1.91354100 | -4.90673900 | O | 2.94047800  | -0.38817300 | 0.92087700  |
| H | 1.66544100  | 2.33394600  | -6.25100700 | H | 11.92246000 | 0.48408500  | -3.27555600 |
| H | -3.50626100 | 1.94460900  | -6.36229800 | H | 7.78848300  | -1.18620200 | 2.60022500  |
| H | -2.96479400 | -0.35142900 | -5.49024900 | H | -0.64466900 | 3.56174600  | -7.91058700 |
| H | -0.48687000 | 4.29020200  | -6.32058500 | H | -8.82351800 | 3.32227300  | 2.29547200  |
| H | -2.07870600 | 4.15698300  | -7.09614500 | H | -1.45913200 | 7.55309900  | 1.00771400  |
| H | -4.28219100 | -0.75974900 | 6.50673000  | H | 0.14635100  | 7.19410200  | 0.36161100  |
| H | -4.88468700 | 0.68085900  | 7.29256300  | H | -2.35530600 | 6.04290800  | 2.61475400  |
| H | -2.21719700 | 1.97343200  | 5.20019300  | H | -1.84544200 | 4.37183600  | 2.64819100  |
| H | -3.81827600 | 1.48868200  | 4.98841400  | O | -0.01334100 | -0.22413700 | 1.12149300  |
| H | -2.19092500 | -2.20525300 | 6.95444600  | C | 4.52555800  | 6.40888500  | -0.06824700 |
| H | -0.67915600 | -2.13966000 | 7.83051400  | C | 5.73134700  | 5.66379400  | -0.59722200 |
| H | -0.18774800 | -3.85674800 | 4.31566000  | C | 5.63596200  | 4.34040000  | -1.06058100 |
| H | -0.58526000 | -0.07552300 | 6.13799900  | C | 6.98857400  | 6.28444100  | -0.68582700 |
| H | 0.34455900  | 0.28243000  | 3.75128900  | C | 6.73530300  | 3.66009000  | -1.59052800 |
| H | 2.80860000  | -7.46594600 | 2.23821800  | C | 8.10003600  | 5.61914500  | -1.20975700 |
| H | 1.35821500  | -8.44239800 | 2.39348800  | C | 7.97859100  | 4.29991100  | -1.66828600 |
| H | -0.74292100 | -7.31402800 | 1.42601200  | O | 9.03848300  | 3.60362800  | -2.18427700 |
| H | 2.15059700  | -4.47972600 | 2.53452200  | H | 9.77285900  | 4.20929400  | -2.32404700 |
| H | -1.71203900 | -5.02206300 | 0.96935300  | H | 9.06320800  | 6.13333200  | -1.26364800 |
| H | -4.96687300 | 1.88901000  | 0.81852600  | H | 6.63138200  | 2.63756300  | -1.95313800 |
| H | -4.11688600 | 3.43649700  | 0.72661400  | H | 7.11017700  | 7.31375400  | -0.34190200 |
| H | -0.09316900 | 1.59573300  | 0.70755200  | H | 4.67416600  | 3.82487800  | -1.01965600 |

|            |             |             |             |    |             |             |             |
|------------|-------------|-------------|-------------|----|-------------|-------------|-------------|
| H          | 4.07825200  | 7.03707800  | -0.85473100 | C  | 1.83911800  | -7.57069100 | 2.71457400  |
| H          | 4.79538500  | 7.07649500  | 0.76154900  | C  | 1.01176300  | -6.46844700 | 2.13300500  |
| H          | 3.74137100  | 5.72797300  | 0.28647800  | N  | -0.23690000 | -6.62661700 | 1.56408500  |
| <b>510</b> |             |             |             | C  | 1.22825800  | -5.11427000 | 2.12317800  |
| C          | -1.11658900 | 3.64819900  | -6.95412500 | C  | -0.71677500 | -5.40448500 | 1.23439800  |
| C          | -1.12174800 | 2.29250300  | -6.30247300 | N  | 0.14957600  | -4.46798900 | 1.56855000  |
| C          | -2.18943400 | 1.43476000  | -6.16980100 | C  | 8.46104700  | -0.49992500 | 2.12925100  |
| C          | 0.03004200  | 1.57092300  | -5.80672500 | N  | 7.84909600  | 0.83383100  | 2.21541700  |
| N          | -1.77985000 | 0.23729500  | -5.61139200 | C  | 6.53618900  | 1.07124300  | 1.98945800  |
| C          | -0.42201300 | 0.28479200  | -5.38959800 | N  | 5.83259000  | 0.26757900  | 1.22176300  |
| C          | 1.40144700  | 1.87952100  | -5.69100400 | N  | 5.96715100  | 2.14749400  | 2.57538400  |
| C          | 0.45150900  | -0.68392500 | -4.87165400 | C  | 11.90426600 | 0.31009100  | -2.21988000 |
| C          | 2.27111700  | 0.92062100  | -5.17949700 | N  | 11.39277900 | -1.02358100 | -1.93185800 |
| C          | 1.79979100  | -0.34965100 | -4.77587400 | C  | 10.07798000 | -1.34781100 | -1.86016900 |
| C          | 0.16814900  | 8.12178200  | 2.32344600  | N  | 9.13606500  | -0.41039300 | -1.91747300 |
| C          | -0.47892700 | 7.11609100  | 1.36343800  | N  | 9.70870500  | -2.61811400 | -1.70013100 |
| C          | -0.41642200 | 5.70698200  | 1.94726100  | C  | -6.33471400 | -3.95253900 | -7.05720400 |
| O          | 0.63890200  | 5.09204800  | 2.01718600  | C  | -7.31711900 | -3.17091600 | -6.15151500 |
| N          | -1.58665400 | 5.19628000  | 2.41645600  | C  | -6.81090700 | -2.31409400 | -5.00906000 |
| C          | -1.25306500 | -4.12250600 | 7.20132500  | C  | -7.13078000 | -2.62950200 | -3.67664900 |
| C          | -1.16157300 | -2.62232400 | 6.93997200  | C  | -6.13699900 | -1.10298400 | -5.23324500 |
| C          | -0.47396800 | -2.20492800 | 5.67680300  | C  | -6.81298300 | -1.77939800 | -2.61880000 |
| N          | -0.21188200 | -0.87279900 | 5.41973800  | C  | -5.81037400 | -0.23955600 | -4.18353400 |
| C          | -0.10036100 | -2.86674400 | 4.53293700  | C  | -6.15005400 | -0.56383200 | -2.85641100 |
| C          | 0.26494700  | -0.76668400 | 4.16532100  | O  | -5.89659300 | 0.24810200  | -1.81245900 |
| N          | 0.35262600  | -1.95903000 | 3.59414600  | C  | 3.06468900  | -1.84990900 | 0.63343900  |
| C          | -4.51455500 | -3.15677300 | 2.20535300  | C  | 4.84354900  | -2.38535500 | -1.13745400 |
| C          | -4.22444500 | -2.26410600 | 0.98967100  | C  | 6.36657700  | -2.27634700 | -1.24656200 |
| C          | -2.76104900 | -2.13748700 | 0.54684200  | O  | 1.99363900  | -2.51968900 | 0.63685000  |
| O          | -1.87769100 | -2.22531500 | 1.47559400  | O  | 6.88723500  | -1.21845000 | -0.73156100 |
| O          | -2.49672200 | -1.91771000 | -0.64518600 | O  | 7.02778600  | -3.15575800 | -1.81811500 |
| C          | -3.61816400 | -6.85135700 | -4.73426500 | C  | -3.11999100 | 2.12612200  | 1.59193300  |
| C          | -2.89690600 | -6.47990000 | -3.43054600 | N  | -3.58787400 | 1.82292100  | -2.22161200 |
| C          | -1.95780400 | -5.27163800 | -3.57441400 | O  | -1.84577900 | 1.98087100  | 1.93651700  |
| C          | -0.86324200 | -5.21781300 | -2.50691900 | C  | -3.45062500 | 2.42316300  | 0.12788600  |
| O          | -0.19814000 | -6.20245000 | -2.22107200 | N  | -0.33340200 | 1.73374400  | -0.26093800 |
| N          | -0.62132700 | -3.99275100 | -1.95436100 | O  | -3.99059700 | 2.11143500  | 2.43443500  |
| C          | -3.80088300 | -0.65176500 | 8.63531400  | C  | -2.75689400 | 1.65331800  | -1.01667600 |
| C          | -4.06924100 | -0.01021200 | 7.27156800  | C  | 0.86204600  | 2.58247300  | -0.29617500 |
| C          | -2.89951200 | 0.76531700  | 6.67241000  | C  | 0.01653000  | 0.30799900  | -0.29476200 |
| O          | -1.75954600 | 0.70776800  | 7.13598200  | C  | -1.30194400 | 2.08541500  | -1.31066800 |
| N          | -3.18876400 | 1.49859300  | 5.57434100  | Fe | 0.10791600  | -2.29534200 | 1.49652300  |
| C          | 1.96698000  | -7.45995400 | 4.24032500  | C  | 4.35773900  | -2.60454900 | 0.32058500  |
|            |             |             |             | H  | 4.20359300  | -3.67413800 | 0.50167000  |

|   |             |             |             |   |             |             |             |
|---|-------------|-------------|-------------|---|-------------|-------------|-------------|
| H | 5.11755500  | -2.25566600 | 1.03252600  | H | 3.33622700  | 1.14510000  | -5.09686200 |
| H | -7.00434900 | -4.41290100 | -7.75537300 | H | 0.09287600  | -1.66446300 | -4.55908200 |
| H | -5.65570500 | -3.31614500 | -7.58509600 | H | 1.78059300  | 2.85192700  | -6.00962300 |
| H | -5.77519300 | -4.71887400 | -6.51143400 | H | -3.22807200 | 1.58216400  | -6.45206000 |
| H | -2.90840900 | -7.22627400 | -5.44207600 | H | -2.37338000 | -0.56423400 | -5.45587800 |
| H | -4.36413300 | -7.59572800 | -4.54939600 | H | -0.56224600 | 4.38977400  | -6.36134800 |
| H | -4.11878000 | -5.98111500 | -5.17698100 | H | -2.13465400 | 4.02873000  | -7.10788200 |
| H | 0.29337700  | 9.08102500  | 1.86269900  | H | -4.34360600 | -0.78029700 | 6.52989600  |
| H | 1.12327900  | 7.76433100  | 2.65322400  | H | -4.94310000 | 0.65840700  | 7.32916000  |
| H | -0.45644100 | 8.26159500  | 3.21781700  | H | -2.43483100 | 1.92913000  | 5.05673600  |
| H | 1.02447400  | -7.58567100 | 4.73086600  | H | -4.07559500 | 1.44886600  | 5.09173400  |
| H | 2.41779000  | -6.54468700 | 4.56276900  | H | -2.17657100 | -2.20350600 | 6.90365900  |
| H | 2.61610100  | -8.27001700 | 4.60833700  | H | -0.67037100 | -2.13006900 | 7.79290800  |
| H | -1.74015800 | -4.66129700 | 6.41547500  | H | -0.15738800 | -3.92676200 | 4.31552000  |
| H | -0.28333300 | -4.54099100 | 7.37261300  | H | -0.49940900 | -0.10802200 | 6.04439000  |
| H | -1.83805600 | -4.29308600 | 8.11580000  | H | 0.49779300  | 0.17900400  | 3.68866900  |
| H | -3.65125900 | 0.09994600  | 9.38246600  | H | 2.83792300  | -7.55037900 | 2.25296300  |
| H | -4.65045600 | -1.24801300 | 8.89493800  | H | 1.40491000  | -8.54492800 | 2.44654300  |
| H | -2.91295300 | -1.28867600 | 8.62345600  | H | -0.68259100 | -7.50708700 | 1.34201000  |
| H | -5.55214300 | -3.09966300 | 2.46171400  | H | 2.09177600  | -4.56972300 | 2.48659100  |
| H | -4.25629800 | -4.17346700 | 1.99315400  | H | -1.67648900 | -5.24766100 | 0.75759900  |
| H | -3.92760300 | -2.83500500 | 3.07513900  | H | -4.52919100 | 2.26783100  | 0.03797200  |
| H | 5.06829700  | 2.48410100  | 2.25933900  | H | -3.28329100 | 3.50519900  | -0.00397200 |
| H | 6.39962700  | 2.62160700  | 3.35420400  | H | -1.21991100 | 1.92556600  | 1.14039400  |
| H | 4.80165700  | 0.23779100  | 1.20682600  | H | -2.77749400 | 0.57808600  | -0.78979600 |
| H | 6.28363300  | -0.34435000 | 0.48944500  | H | -3.66341400 | 2.80809300  | -2.47386200 |
| H | 8.39736600  | 1.59174900  | 2.59753100  | H | -0.88500400 | -0.27580800 | -0.51518400 |
| H | 8.63140800  | -0.81036100 | 1.09409500  | H | -3.14619000 | 1.36192400  | -3.01379300 |
| H | 9.40909700  | -0.48139100 | 2.67584000  | H | 0.75588900  | 0.11033000  | -1.09120500 |
| H | 8.68398200  | -2.87935300 | -1.74646200 | H | 1.51502600  | -0.13630800 | 0.93100900  |
| H | 10.40059000 | -3.34229100 | -1.57724200 | H | -0.99363800 | 1.66040500  | -2.28220600 |
| H | 9.36241200  | 0.55156800  | -2.11457400 | H | -1.27873300 | 3.17852700  | -1.43532400 |
| H | 8.18615100  | -0.66032200 | -1.53429300 | H | 1.39665000  | 2.49939500  | -1.25934800 |
| H | 12.03440500 | -1.78938900 | -2.09082900 | H | 0.59334600  | 3.62767800  | -0.11953800 |
| H | 12.92612300 | 0.38704100  | -1.83044900 | H | 1.54085700  | 2.28821900  | 0.51099900  |
| H | 11.30687700 | 1.07530500  | -1.71433200 | H | -4.79800100 | -2.59068600 | 0.11408800  |
| H | -7.92169500 | -2.52343300 | -6.80977200 | H | -4.56320100 | -1.23639500 | 1.19444500  |
| H | -8.03245600 | -3.89862300 | -5.73855700 | H | -3.63263600 | -6.26940300 | -2.63686100 |
| H | -5.89910500 | -0.80095300 | -6.25668400 | H | -2.30321900 | -7.34006000 | -3.08765400 |
| H | -7.66565700 | -3.55760700 | -3.46046700 | H | -1.41344600 | -5.34362300 | -4.53137500 |
| H | -7.08712600 | -2.03454000 | -1.59544900 | H | -2.52942000 | -4.33225700 | -3.61122900 |
| H | -5.33592200 | 0.71921900  | -4.39514400 | H | 0.09512400  | -3.96887400 | -1.23876200 |
| H | -5.17853400 | 0.88931200  | -2.02681700 | H | -1.33041900 | -3.26568300 | -1.89346500 |
| H | 2.50530000  | -1.08740600 | -4.39052300 | H | 4.48414700  | -3.19409400 | -1.78408900 |

|                                                       |             |             |             |   |             |             |             |
|-------------------------------------------------------|-------------|-------------|-------------|---|-------------|-------------|-------------|
| H                                                     | 4.44011600  | -1.43871200 | -1.52592500 | C | -1.15411300 | -1.07074000 | 7.38251900  |
| O                                                     | 3.12780700  | -0.60900300 | 0.85462900  | C | -0.51817900 | -0.87757100 | 6.04384200  |
| H                                                     | 11.92245800 | 0.48408500  | -3.27555600 | N | -0.28242800 | 0.38904900  | 5.54149700  |
| H                                                     | 7.78848300  | -1.18620200 | 2.60022500  | C | -0.19489800 | -1.74010100 | 5.02995000  |
| H                                                     | -0.64463800 | 3.56170000  | -7.91056700 | C | 0.12468200  | 0.27901900  | 4.27314500  |
| H                                                     | -1.51007800 | 7.41485100  | 1.12264400  | N | 0.20465300  | -1.00666200 | 3.92509300  |
| H                                                     | 0.08095600  | 7.08795100  | 0.41759700  | C | -4.53737300 | -2.51888900 | 2.83179200  |
| H                                                     | -2.46677600 | 5.68312500  | 2.33707200  | C | -4.22727500 | -1.85576900 | 1.48296400  |
| H                                                     | -1.59268700 | 4.24751100  | 2.77152100  | C | -2.80337100 | -1.96890600 | 0.94398200  |
| O                                                     | 0.52061600  | -0.11924600 | 0.94753100  | O | -1.84348300 | -1.81174600 | 1.83762800  |
| C                                                     | 4.25506700  | 6.22218100  | -0.47186300 | O | -2.56053700 | -2.15072300 | -0.23788300 |
| C                                                     | 5.54890500  | 5.51727800  | -0.81501200 | C | -3.74885200 | -7.54784400 | -3.22617300 |
| C                                                     | 5.54605900  | 4.24517200  | -1.41847800 | C | -3.00257100 | -6.98520000 | -2.00680800 |
| C                                                     | 6.79730700  | 6.10855100  | -0.57200600 | C | -1.82053800 | -6.08564300 | -2.37811100 |
| C                                                     | 6.72834600  | 3.59176200  | -1.76723200 | C | -0.83996100 | -5.83863400 | -1.23098400 |
| C                                                     | 7.99322600  | 5.46703600  | -0.91266400 | O | -0.83217700 | -6.50095400 | -0.20386300 |
| C                                                     | 7.96427500  | 4.20481100  | -1.51728400 | N | 0.08161800  | -4.85707900 | -1.46126700 |
| O                                                     | 9.10437100  | 3.53517200  | -1.87239300 | C | -3.73488300 | 1.22049200  | 8.61990100  |
| H                                                     | 9.85286300  | 4.13623700  | -1.80823100 | C | -3.96127200 | 1.57712300  | 7.14737700  |
| H                                                     | 8.94828100  | 5.96028400  | -0.71339800 | C | -2.75018700 | 2.19187300  | 6.44486100  |
| H                                                     | 6.70066300  | 2.61276200  | -2.24613000 | O | -1.62849900 | 2.20162800  | 6.98908600  |
| H                                                     | 6.84810000  | 7.09701400  | -0.11103700 | N | -2.95427500 | 2.67645200  | 5.21836900  |
| H                                                     | 4.59507800  | 3.75405300  | -1.63518300 | C | 1.91069900  | -6.41122300 | 5.64990500  |
| H                                                     | 3.67089100  | 6.43478200  | -1.38011700 | C | 1.72894200  | -6.72351500 | 4.15298000  |
| H                                                     | 4.43907800  | 7.17931900  | 0.03221900  | C | 0.93784100  | -5.66945900 | 3.43305100  |
| H                                                     | 3.61802900  | 5.61613900  | 0.18744900  | N | -0.31539800 | -5.87185300 | 2.88490700  |
|                                                       |             |             |             | C | 1.19745800  | -4.33813800 | 3.21780300  |
|                                                       |             |             |             | C | -0.76038300 | -4.70961200 | 2.36887700  |
|                                                       |             |             |             | N | 0.13281000  | -3.75410900 | 2.56325500  |
|                                                       |             |             |             | C | 8.46783800  | -0.10798000 | 2.13638500  |
|                                                       |             |             |             | N | 7.90595600  | 1.24614900  | 2.02279900  |
|                                                       |             |             |             | C | 6.59204100  | 1.49620000  | 1.82472100  |
|                                                       |             |             |             | N | 5.82491500  | 0.59901000  | 1.23841300  |
|                                                       |             |             |             | N | 6.08550300  | 2.67211100  | 2.25084300  |
|                                                       |             |             |             | C | 11.88047000 | -0.23767200 | -2.30928000 |
|                                                       |             |             |             | N | 11.28547800 | -1.45139300 | -1.76183100 |
|                                                       |             |             |             | C | 9.95556600  | -1.66923700 | -1.61680900 |
|                                                       |             |             |             | N | 9.07019900  | -0.70144200 | -1.83593700 |
|                                                       |             |             |             | N | 9.51195400  | -2.86075600 | -1.21371800 |
|                                                       |             |             |             | C | -6.45174000 | -5.13997900 | -6.06798200 |
|                                                       |             |             |             | C | -7.39719700 | -4.15148000 | -5.33864800 |
|                                                       |             |             |             | C | -6.85531100 | -3.19599500 | -4.29212000 |
|                                                       |             |             |             | C | -7.06044500 | -3.44621700 | -2.92334500 |
|                                                       |             |             |             | C | -6.25664800 | -1.97103400 | -4.62960800 |
| <b><sup>5</sup>TS<sub>9-10</sub>(dehydrogenation)</b> |             |             |             |   |             |             |             |
| C                                                     | -1.14238300 | 2.25418200  | -7.53360800 |   |             |             |             |
| C                                                     | -1.46974700 | 1.00642500  | -6.76115100 |   |             |             |             |
| C                                                     | -2.70773400 | 0.57159900  | -6.34537400 |   |             |             |             |
| C                                                     | -0.54038600 | -0.03963900 | -6.39466200 |   |             |             |             |
| N                                                     | -2.60707700 | -0.67003600 | -5.74697800 |   |             |             |             |
| C                                                     | -1.29459500 | -1.07601500 | -5.77098300 |   |             |             |             |
| C                                                     | 0.85096600  | -0.21202500 | -6.54892800 |   |             |             |             |
| C                                                     | -0.70124700 | -2.26505600 | -5.32027900 |   |             |             |             |
| C                                                     | 1.44461600  | -1.38645300 | -6.09421300 |   |             |             |             |
| C                                                     | 0.67422000  | -2.40591100 | -5.48932300 |   |             |             |             |
| C                                                     | 0.28074500  | 8.48759900  | 0.64290300  |   |             |             |             |
| C                                                     | -0.36445900 | 7.34102900  | -0.16007800 |   |             |             |             |
| C                                                     | -0.38858600 | 5.98843100  | 0.56650800  |   |             |             |             |
| O                                                     | 0.59281500  | 5.24742900  | 0.55468200  |   |             |             |             |
| N                                                     | -1.54061500 | 5.68243300  | 1.20533300  |   |             |             |             |
| C                                                     | -1.24196500 | -2.50223000 | 7.89836500  |   |             |             |             |

|    |             |             |             |   |             |             |             |
|----|-------------|-------------|-------------|---|-------------|-------------|-------------|
| C  | -6.70480700 | -2.52430200 | -1.94223900 | H | -3.95464100 | -2.04926300 | 3.63543100  |
| C  | -5.88625800 | -1.03533800 | -3.65503000 | H | 5.18909600  | 2.99558300  | 1.91362700  |
| C  | -6.11330800 | -1.29603700 | -2.28990400 | H | 6.58217500  | 3.26179200  | 2.90238000  |
| O  | -5.84032500 | -0.42443200 | -1.30522300 | H | 4.79882900  | 0.62597000  | 1.26593200  |
| C  | 2.94689000  | -1.52282100 | 1.04398300  | H | 6.22055300  | -0.11587100 | 0.57051500  |
| C  | 4.65400800  | -2.28598700 | -0.72225200 | H | 8.49917000  | 2.03364400  | 2.24476400  |
| C  | 6.18035000  | -2.26509000 | -0.86709500 | H | 8.58196600  | -0.59083800 | 1.16152600  |
| O  | 1.86470500  | -2.18016700 | 1.22231000  | H | 9.43859400  | -0.03855200 | 2.63687700  |
| O  | 6.75222700  | -1.15583000 | -0.55915300 | H | 8.47632600  | -3.06714300 | -1.22257200 |
| O  | 6.79121800  | -3.26832900 | -1.26333600 | H | 10.16025300 | -3.59853100 | -0.98182900 |
| C  | -3.49760800 | 2.60290500  | 2.03660200  | H | 9.34046300  | 0.18775400  | -2.22657500 |
| N  | -3.70216600 | 1.40738800  | -1.64623800 | H | 8.10732400  | -0.82532300 | -1.43036300 |
| O  | -2.36863300 | 3.11487000  | 2.29945500  | H | 11.87376700 | -2.27438300 | -1.76922600 |
| C  | -3.90739200 | 2.50517600  | 0.53874200  | H | 12.91103600 | -0.15529700 | -1.94524500 |
| N  | -0.48894800 | 1.33098900  | -0.86888500 | H | 11.34203700 | 0.65120400  | -1.96470300 |
| O  | -4.33171700 | 2.17932500  | 2.86239200  | H | -7.91015400 | -3.55737300 | -6.11307100 |
| C  | -3.00991200 | 1.62907100  | -0.35848400 | H | -8.19308100 | -4.74515200 | -4.86327600 |
| C  | 0.70587800  | 2.13094300  | -1.24149700 | H | -6.11888900 | -1.71665000 | -5.68428800 |
| C  | -0.78561500 | 0.29903800  | -1.81184200 | H | -7.54098800 | -4.37820700 | -2.61571500 |
| C  | -1.62044500 | 2.26349000  | -0.49744200 | H | -6.90458000 | -2.72956400 | -0.89083100 |
| Fe | 0.03267900  | -1.65234600 | 1.97963000  | H | -5.47459900 | -0.06931000 | -3.95143000 |
| C  | 4.20090000  | -2.35316300 | 0.76126400  | H | -5.15369900 | 0.24721800  | -1.54182800 |
| H  | 4.02621900  | -3.39512900 | 1.05207400  | H | 1.16474100  | -3.32510000 | -5.16323400 |
| H  | 4.98829100  | -1.95813500 | 1.41812900  | H | 2.51876600  | -1.53347200 | -6.22002600 |
| H  | -7.13319600 | -5.72245600 | -6.65458200 | H | -1.30276500 | -3.05514500 | -4.87071500 |
| H  | -5.77002600 | -4.63227800 | -6.71776600 | H | 1.45571800  | 0.55991000  | -7.02776600 |
| H  | -5.90232800 | -5.79012700 | -5.37984500 | H | -3.67620200 | 1.05364000  | -6.44967000 |
| H  | -3.05012200 | -8.06723200 | -3.84856500 | H | -3.37721200 | -1.19746000 | -5.36163700 |
| H  | -4.50194700 | -8.22947200 | -2.89021300 | H | -0.44322200 | 2.90719600  | -6.98922800 |
| H  | -4.22472000 | -6.75736700 | -3.81801400 | H | -2.04349400 | 2.83753100  | -7.76139500 |
| H  | 0.41312800  | 9.33255900  | -0.00253700 | H | -4.24467800 | 0.68284000  | 6.56611800  |
| H  | 1.23446400  | 8.19102200  | 1.03174700  | H | -4.81426600 | 2.26500500  | 7.04274500  |
| H  | -0.35182200 | 8.79146400  | 1.48871100  | H | -2.16895600 | 3.02556700  | 4.67659700  |
| H  | 0.97127200  | -6.42268700 | 6.16188100  | H | -3.75316300 | 2.46978300  | 4.59343500  |
| H  | 2.37532000  | -5.45591700 | 5.77822100  | H | -2.16707500 | -0.65491200 | 7.30680100  |
| H  | 2.55630200  | -7.16697600 | 6.11899800  | H | -0.63476500 | -0.44105300 | 8.11955000  |
| H  | -1.74264300 | -3.18166300 | 7.24047600  | H | -0.25279700 | -2.82069300 | 5.00894000  |
| H  | -0.27577500 | -2.89072300 | 8.14411800  | H | -0.57303100 | 1.25830500  | 6.04864100  |
| H  | -1.81779100 | -2.50020600 | 8.83481300  | H | 0.30548200  | 1.11791700  | 3.61040200  |
| H  | -3.56941800 | 2.10521600  | 9.19918000  | H | 2.71425700  | -6.81834200 | 3.67155700  |
| H  | -4.58908300 | 0.70033900  | 8.99998700  | H | 1.23884500  | -7.69959200 | 4.02494400  |
| H  | -2.85609300 | 0.58471500  | 8.75669100  | H | -0.76860400 | -6.76591200 | 2.74420900  |
| H  | -5.57178200 | -2.39720800 | 3.07821800  | H | 2.07527500  | -3.76731700 | 3.49714800  |
| H  | -4.29319800 | -3.56087500 | 2.82725300  | H | -1.70578000 | -4.60539000 | 1.85323100  |



|    |             |             |             |   |             |             |             |
|----|-------------|-------------|-------------|---|-------------|-------------|-------------|
| N  | -2.90670200 | -3.07381200 | 5.54431500  | C | 2.30127200  | -2.64363700 | -2.27310500 |
| C  | -2.78939000 | -7.34884000 | -3.68443400 | H | 1.60858900  | -3.06165500 | -3.01229900 |
| C  | -2.66077600 | -6.02450300 | -4.46019200 | H | 2.98899500  | -3.44740400 | -1.98066600 |
| C  | -2.68038300 | -4.81902900 | -3.56465300 | H | -7.20828000 | 7.23396300  | -4.90187500 |
| N  | -3.71249100 | -3.90340800 | -3.52594600 | H | -5.55104700 | 7.03860200  | -4.38597400 |
| C  | -1.80917100 | -4.39553200 | -2.58610000 | H | -6.49176900 | 5.61197300  | -4.86179000 |
| C  | -3.44211000 | -2.98644300 | -2.57008900 | H | -5.34292000 | 2.60022700  | -7.15843000 |
| N  | -2.29641400 | -3.26112200 | -1.97537400 | H | -6.92530900 | 2.25974500  | -6.50064400 |
| C  | 6.45231000  | -5.16777100 | -1.46953800 | H | -5.83689300 | 3.34545100  | -5.64343700 |
| N  | 6.59428300  | -4.62038000 | -0.10997700 | H | 3.88576100  | 2.13002300  | 8.46683200  |
| C  | 5.63570000  | -3.88956700 | 0.50735900  | H | 3.86195300  | 0.61454600  | 7.60076000  |
| N  | 4.78921200  | -3.16365600 | -0.19025200 | H | 2.59330600  | 0.96319800  | 8.76969900  |
| N  | 5.57484100  | -3.92060500 | 1.85712100  | H | -3.74656500 | -7.44977900 | -3.21707600 |
| C  | 10.52847000 | -2.53871200 | -4.28019600 | H | -2.02173300 | -7.40545300 | -2.94115200 |
| N  | 9.32254600  | -3.06363700 | -4.90817900 | H | -2.66338100 | -8.20094300 | -4.36783700 |
| C  | 8.06179600  | -2.67543700 | -4.59325900 | H | -5.05261300 | -6.57960700 | 0.85353100  |
| N  | 7.82599100  | -1.89448600 | -3.54370700 | H | -3.88625100 | -7.87259800 | 0.99727000  |
| N  | 7.02697800  | -3.10023800 | -5.31856400 | H | -5.25856700 | -7.80566600 | 2.05438100  |
| C  | -6.52447700 | 6.59462400  | -4.38093100 | H | -4.96562400 | -6.32900000 | 6.77421600  |
| C  | -7.12727300 | 6.54800000  | -2.95393200 | H | -6.38538000 | -6.10814200 | 5.77996800  |
| C  | -6.50558900 | 5.67782100  | -1.87710600 | H | -4.87484400 | -6.60946000 | 5.07142700  |
| C  | -7.09055600 | 4.44812100  | -1.52439700 | H | -6.99092500 | -1.21758100 | 1.15998500  |
| C  | -5.42516800 | 6.11273200  | -1.09198400 | H | -6.29188000 | -1.76743700 | -0.34359500 |
| C  | -6.64451900 | 3.70148700  | -0.43648300 | H | -5.57765900 | -2.24413000 | 1.17784400  |
| C  | -4.96054700 | 5.37191800  | 0.00282200  | H | 5.00572200  | -3.24838900 | 2.35285000  |
| C  | -5.57448600 | 4.15520000  | 0.35650900  | H | 5.98675700  | -4.67258500 | 2.38984600  |
| O  | -5.22929300 | 3.42861000  | 1.43351700  | H | 3.89126300  | -2.80199200 | 0.17862200  |
| C  | 1.51361400  | -2.22678000 | -1.02312400 | H | 5.02160900  | -2.83342100 | -1.16297000 |
| C  | 3.08591300  | -1.46500600 | -2.91019500 | H | 7.35537400  | -4.95633900 | 0.46382300  |
| C  | 4.42352100  | -1.92144100 | -3.49603600 | H | 6.57396400  | -4.39654500 | -2.23589400 |
| O  | 0.28796900  | -1.95492600 | -1.21790200 | H | 7.20194700  | -5.95316400 | -1.60554100 |
| O  | 5.34054400  | -2.18847800 | -2.63376900 | H | 6.06228000  | -2.70579300 | -5.13574000 |
| O  | 4.58306500  | -2.02019000 | -4.72203800 | H | 7.16550400  | -3.73855100 | -6.08772300 |
| C  | -2.40196200 | 0.18348500  | 4.21481300  | H | 8.57796000  | -1.49942500 | -3.00156400 |
| N  | -2.48980100 | 3.55426000  | 2.27251000  | H | 6.84461700  | -1.89473700 | -3.15505600 |
| O  | -1.26894100 | -0.35335200 | 3.94688200  | H | 9.44538700  | -3.48130000 | -5.82139700 |
| C  | -2.57579700 | 1.70079500  | 3.91296100  | H | 11.34530800 | -3.25237400 | -4.43737400 |
| N  | 0.30247000  | 2.07085000  | 1.39875000  | H | 10.39376600 | -2.43352000 | -3.19866200 |
| O  | -3.36940000 | -0.37527500 | 4.74427100  | H | -7.15765300 | 7.58389000  | -2.57765300 |
| C  | -1.97273100 | 2.21174200  | 2.59287300  | H | -8.18299200 | 6.25155600  | -3.05143700 |
| C  | 1.71345100  | 2.47264000  | 1.50856200  | H | -4.96443400 | 7.08181800  | -1.30339500 |
| C  | -0.17238600 | 1.54087700  | 0.33156100  | H | -7.94394600 | 4.07731900  | -2.09738100 |
| C  | -0.44239500 | 2.14850100  | 2.67754800  | H | -7.13756900 | 2.76876900  | -0.16482200 |
| Fe | -1.44038200 | -2.24360800 | -0.18875800 | H | -4.16115700 | 5.77007700  | 0.63000000  |



|   |             |             |             |   |             |             |             |
|---|-------------|-------------|-------------|---|-------------|-------------|-------------|
| H | -4.30682300 | 3.59319600  | 1.73922900  | H | -2.11587800 | 0.86394300  | -3.25856900 |
| H | 0.82428500  | 2.83246100  | -4.30874700 | H | 2.48274600  | -0.98280800 | -3.68865300 |
| H | 2.99443100  | 3.75030700  | -3.52301000 | H | 3.31961600  | -0.71253300 | -2.14269600 |
| H | -1.33058800 | 3.74200800  | -3.44777700 | O | 2.10178800  | -2.15431600 | 0.07982700  |
| H | 3.07017400  | 5.59911300  | -1.86419400 | H | 10.79711800 | -1.60037300 | -4.71883400 |
| H | -1.43904600 | 7.47584100  | -0.11623700 | H | 5.47038600  | -5.58792600 | -1.53610300 |
| H | -2.33268800 | 5.69565000  | -1.65230200 | H | 2.07409500  | 8.27068600  | -0.79975200 |
| H | 2.29634600  | 7.14394500  | 0.52531100  | H | 1.69349700  | 2.76132500  | 7.32861300  |
| H | 1.03456000  | 8.39030200  | 0.60840600  | H | 3.14850600  | 2.76621000  | 6.32801400  |
| H | -5.32540200 | -4.08392400 | 4.71454200  | H | 0.20181700  | 0.79270800  | 7.02786500  |
| H | -5.28693100 | -3.87171500 | 6.45090600  | H | 0.11963000  | 0.11129500  | 5.42908700  |
| H | -1.90696100 | -2.96515800 | 5.43392600  | O | -0.38798900 | -1.02846000 | 1.42958400  |
| H | -3.42263800 | -2.20702500 | 5.35120500  | C | 6.74469100  | 1.06239100  | 4.15531400  |
| H | -4.40058100 | -5.80613800 | 3.17761400  | C | 7.54549700  | 0.64589700  | 2.94135900  |
| H | -3.27663800 | -7.14237100 | 3.30807200  | C | 6.94405300  | 0.47454400  | 1.68306600  |
| H | -2.99406600 | -5.00324700 | -0.03786000 | C | 8.93427600  | 0.44859400  | 3.02107800  |
| H | -1.63701600 | -5.22836400 | 3.93139100  | C | 7.68529100  | 0.12793600  | 0.55027000  |
| H | -0.09924200 | -3.58877300 | 2.66285800  | C | 9.69087600  | 0.09809400  | 1.90021600  |
| H | -1.71893700 | -6.02614200 | -5.02997900 | C | 9.06861600  | -0.06278900 | 0.65442700  |
| H | -3.46171400 | -5.93912600 | -5.20932300 | O | 9.76394100  | -0.40945500 | -0.47249100 |
| H | -4.47547500 | -3.83893400 | -4.18700600 | H | 10.70637000 | -0.37938900 | -0.28154600 |
| H | -0.87413300 | -4.84906500 | -2.27620300 | H | 10.76964000 | -0.04827300 | 1.99976500  |
| H | -4.09704500 | -2.15652200 | -2.33637900 | H | 7.19570300  | 0.00843600  | -0.41571900 |
| H | -3.64761700 | 1.91940900  | 3.91157200  | H | 9.44399500  | 0.57347300  | 3.97870300  |
| H | -2.14487400 | 2.25521300  | 4.76351500  | H | 5.86713800  | 0.62273900  | 1.57665200  |
| H | -0.69647800 | -0.89045600 | 2.36146100  | H | 6.88447900  | 2.13433800  | 4.36627400  |
| H | -2.33107500 | 1.54807700  | 1.79611100  | H | 7.06037200  | 0.51417700  | 5.05423600  |
| H | -2.29994900 | 4.20519000  | 3.03395500  | H | 5.66991500  | 0.89444900  | 4.01710000  |
| H | -1.21715900 | 1.20117800  | 0.24714100  |   |             |             |             |
| H | -2.03038500 | 3.92921000  | 1.44543800  |   |             |             |             |
| H | 0.48834400  | 1.43646700  | -0.52762000 |   |             |             |             |
| H | 0.53901900  | -1.31138200 | 1.42694700  |   |             |             |             |
| H | -0.04705900 | 3.01704300  | 3.22026700  |   |             |             |             |
| H | -0.16729700 | 1.23760300  | 3.23074200  |   |             |             |             |
| H | 1.76351200  | 3.55825000  | 1.65147700  |   |             |             |             |
| H | 2.14489500  | 1.97144000  | 2.38368500  |   |             |             |             |
| H | 2.25378500  | 2.19855400  | 0.59890000  |   |             |             |             |
| H | -5.59708800 | 0.62094100  | 0.01778500  |   |             |             |             |
| H | -5.12011100 | 0.24009700  | 1.65015700  |   |             |             |             |
| H | -5.91623400 | 1.01429200  | -4.61226200 |   |             |             |             |
| H | -5.46245000 | 0.32161100  | -6.16566000 |   |             |             |             |
| H | -3.28572600 | 1.69227700  | -6.04538100 |   |             |             |             |
| H | -3.70232500 | 2.07684600  | -4.37717600 |   |             |             |             |
| H | -1.77121300 | -0.79162600 | -3.56474600 |   |             |             |             |
